# Supplementary material for: New Megastigmane and Polyphenolic Components of Henna Leaves and Their Tumor-Specific Cytotoxicity on Human Oral Squamous Carcinoma Cell Lines
Source: MDPI journal article supplement (doi:10.3390/antiox12111951), 2023-11-01
Supplement: s1 [file s1]

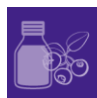

## Supplementary materials

# New Megastigmane and Polyphenolic Components of Henna Leaves and Their Tumor-Specific Cytotoxicity on Human Oral Squamous Carcinoma Cell Lines

Mohamed A. A. Orabi<sup>1,\*</sup>, Esam A Orabi<sup>2,\*</sup>, Ahmed Abdullah Al Awadh<sup>3</sup>, Mohammed Merae Alshahrani<sup>3</sup>, Basel A. Abdel-Wahab<sup>4</sup>, Hiroshi Sakagami<sup>5</sup> and Tsutomu Hatano<sup>6</sup>

<sup>1</sup> Department of Pharmacognosy, College of Pharmacy, Najran University, Najran 66454, Saudi Arabia; mohamedorabi@azhar.edu.eg; maorabi@nu.edu.sa.

<sup>2</sup> Department of Chemistry and Biochemistry, Concordia University, 7141 Sherbrooke Street West, Montréal, Québec H4B 1R6, Canada; e\_orabi@live.concordia.ca.

<sup>3</sup> Department of Clinical Laboratory Sciences, Faculty of Applied Medical Sciences, Najran University, Najran 66454, Saudi Arabia; aaalawadh@nu.edu.sa (AAAA), mmalshahrani@nu.edu.sa (MMA)

<sup>4</sup> Department of Pharmacology, College of Pharmacy, Najran University, Najran 64462, Saudi Arabia; babdelnaem@nu.edu.sa

<sup>5</sup> Meikai University Research Institute of Odontology (M-RIO), 1-1 Keyakidai, Sakado, Saitama 350-0283, Japan; sakagami@dent.meikai.ac.jp

<sup>6</sup> Graduate School of Medicine, Dentistry and Pharmaceutical Sciences, Okayama University, Tsushima, Okayama 700-8530, Japan; hatano-t@cc.okayama-u.ac.jp

\* Correspondence: mohamedorabi@azhar.edu.eg (M.A.A.O.; e\_orabi@live.concordia.ca (E.A.O.))

## Table of content

| List of content                                                                                                                           | Page |
|-------------------------------------------------------------------------------------------------------------------------------------------|------|
| Figure S1: Positive mode HRESIMS spectrum of compound <b>1</b>                                                                            | S4   |
| Figure S2: Negative mode HRESIMS spectrum of compound <b>1</b>                                                                            | S5   |
| Figure S3: $^1\text{H}$ NMR spectrum of compound <b>1</b> [600 MHz, acetone- $d_6$ + $\text{D}_2\text{O}$ (9+1)]                          | S6   |
| Figure S4: Expanded $^1\text{H}$ NMR spectrum of compound <b>1</b> [600 MHz, acetone- $d_6$ + $\text{D}_2\text{O}$ (9+1)]                 | S7   |
| Figure S5: Expanded $^1\text{H}$ NMR spectrum of compound <b>1</b> [600 MHz, acetone- $d_6$ + $\text{D}_2\text{O}$ (9+1)]                 | S8   |
| Figure S6: $^1\text{H}$ - $^1\text{H}$ COSY spectrum of compound <b>1</b> [600 MHz, acetone- $d_6$ + $\text{D}_2\text{O}$ (9+1)]          | S9   |
| Figure S7: Expanded $^1\text{H}$ - $^1\text{H}$ COSY spectrum of compound <b>1</b> [600 MHz, acetone- $d_6$ + $\text{D}_2\text{O}$ (9+1)] | S10  |
| Figure S8: Expanded $^1\text{H}$ - $^1\text{H}$ COSY spectrum of compound <b>1</b> [600 MHz, acetone- $d_6$ + $\text{D}_2\text{O}$ (9+1)] | S11  |
| Figure S9: $^{13}\text{C}$ NMR spectrum of compound <b>1</b> [151 MHz, acetone- $d_6$ + $\text{D}_2\text{O}$ (9+1)]                       | S12  |
| Figure S10: HSQC spectrum of compound <b>1</b> [600 MHz, acetone- $d_6$ + $\text{D}_2\text{O}$ (9+1)]                                     | S13  |
| Figure S11: Expanded HSQC spectrum of compound <b>1</b> [600 MHz, acetone- $d_6$ + $\text{D}_2\text{O}$ (9+1)]                            | S14  |
| Figure S12: Expanded HSQC spectrum of compound <b>1</b> [600 MHz, acetone- $d_6$ + $\text{D}_2\text{O}$ (9+1)]                            | S15  |
| Figure S13: HMBC spectrum of compound <b>1</b> [600 MHz, acetone- $d_6$ + $\text{D}_2\text{O}$ (9+1)]                                     | S16  |
| Figure S14: Expanded HMBC spectrum of compound <b>1</b> [600 MHz, acetone- $d_6$ + $\text{D}_2\text{O}$ (9+1)]                            | S17  |
| Figure S15: NOESY spectrum of compound <b>1</b> [600 MHz, acetone- $d_6$ + $\text{D}_2\text{O}$ (9+1)]                                    | S18  |
| Figure S16: Expanded NOESY spectrum of compound <b>1</b> [600 MHz, acetone- $d_6$ + $\text{D}_2\text{O}$ (9+1)]                           | S19  |
| Figure S17: Expanded NOESY spectrum of compound <b>1</b> [600 MHz, acetone- $d_6$ + $\text{D}_2\text{O}$ (9+1)]                           | S20  |
| Figure S18: $^1\text{H}$ NMR spectrum of compound <b>2</b> (600 MHz, $\text{DMSO}-d_6$ )                                                  | S21  |
| Figure S19: $^1\text{H}$ - $^1\text{H}$ COSY spectrum of compound <b>2</b> (600 MHz, $\text{DMSO}-d_6$ )                                  | S22  |
| Figure S20: $^{13}\text{C}$ NMR spectrum of compound <b>2</b> (151 MHz, $\text{DMSO}-d_6$ )                                               | S23  |
| Figure S21: HSQC spectrum of compound <b>2</b> (600 MHz, $\text{DMSO}-d_6$ )                                                              | S24  |
| Figure S22: $^1\text{H}$ NMR spectrum of compound <b>3</b> [600 MHz, acetone- $d_6$ + $\text{D}_2\text{O}$ (9+1)]                         | S25  |
| Figure S23: $^1\text{H}$ - $^1\text{H}$ COSY spectrum of compound <b>3</b> [600 MHz, acetone- $d_6$ + $\text{D}_2\text{O}$ (9+1)]         | S26  |
| Figure S24: $^{13}\text{C}$ spectrum of compound <b>3</b> [151 MHz, acetone- $d_6$ + $\text{D}_2\text{O}$ (9+1)]                          | S27  |
| Figure S25: HSQC spectrum of compound <b>3</b> [600 MHz, acetone- $d_6$ + $\text{D}_2\text{O}$ (9+1)]                                     | S28  |

---

|                                                                                                                                                   |     |
|---------------------------------------------------------------------------------------------------------------------------------------------------|-----|
| Figure S26: HMBC spectrum of compound <b>3</b> [600 MHz, acetone- <i>d</i> <sub>6</sub> + D <sub>2</sub> O (9+1)]                                 | S29 |
| Figure S27: <sup>1</sup> H NMR spectrum of compound <b>4</b> (600 MHz, DMSO- <i>d</i> <sub>6</sub> )                                              | S30 |
| Figure S28: <sup>13</sup> C NMR spectrum of compound <b>4</b> (151 MHz, DMSO- <i>d</i> <sub>6</sub> )                                             | S31 |
| Figure S29: <sup>1</sup> H NMR spectrum of compound <b>5</b> [600 MHz, acetone- <i>d</i> <sub>6</sub> + D <sub>2</sub> O (9+1)]                   | S32 |
| Figure S30: <sup>1</sup> H- <sup>1</sup> H COSY spectrum of compound <b>5</b> [600 MHz, acetone- <i>d</i> <sub>6</sub> + D <sub>2</sub> O (9+1)]  | S33 |
| Figure S31: <sup>1</sup> H NMR spectrum of compound <b>6</b> [600 MHz, acetone- <i>d</i> <sub>6</sub> + D <sub>2</sub> O (9+1)]                   | S34 |
| Figure S32: <sup>1</sup> H- <sup>1</sup> H COSY spectrum of compound <b>6</b> [600 MHz, acetone- <i>d</i> <sub>6</sub> + D <sub>2</sub> O (9+1)]  | S35 |
| Figure S33: <sup>1</sup> H NMR spectrum of compound <b>7</b> [600 MHz, acetone- <i>d</i> <sub>6</sub> + D <sub>2</sub> O (9+1)]                   | S36 |
| Figure S34: <sup>1</sup> H- <sup>1</sup> H COSY spectrum of compound <b>7</b> [600 MHz, acetone- <i>d</i> <sub>6</sub> + D <sub>2</sub> O (9+1)]  | S37 |
| Figure S35: <sup>1</sup> H NMR spectrum of compound <b>8</b> [600 MHz, acetone- <i>d</i> <sub>6</sub> + D <sub>2</sub> O (9+1)]                   | S38 |
| Figure S36: <sup>1</sup> H- <sup>1</sup> H COSY spectrum of compound <b>8</b> [600 MHz, acetone- <i>d</i> <sub>6</sub> + D <sub>2</sub> O (9+1)]  | S39 |
| Figure S37: <sup>1</sup> H NMR spectrum of compound <b>9</b> [600 MHz, acetone- <i>d</i> <sub>6</sub> + D <sub>2</sub> O (9+1)]                   | S40 |
| Figure S38: <sup>1</sup> H- <sup>1</sup> H COSY spectrum of compound <b>9</b> [600 MHz, acetone- <i>d</i> <sub>6</sub> + D <sub>2</sub> O (9+1)]  | S41 |
| Figure S39: <sup>1</sup> H NMR spectrum of compound <b>10</b> [600 MHz, acetone- <i>d</i> <sub>6</sub> + D <sub>2</sub> O (9+1)]                  | S42 |
| Figure S40: <sup>1</sup> H- <sup>1</sup> H COSY spectrum of compound <b>10</b> [600 MHz, acetone- <i>d</i> <sub>6</sub> + D <sub>2</sub> O (9+1)] | S43 |
| Experimental procedures of TD-DFT calculation of the ECD spectrum of <b>1</b>                                                                     | S44 |
| Figure S41: 3D structures of possible stereoisomers of compound <b>1</b>                                                                          | S45 |
| Figure S42: Calculated (A) and practically measured (B) ECD spectra of compound <b>1</b>                                                          | S46 |

---

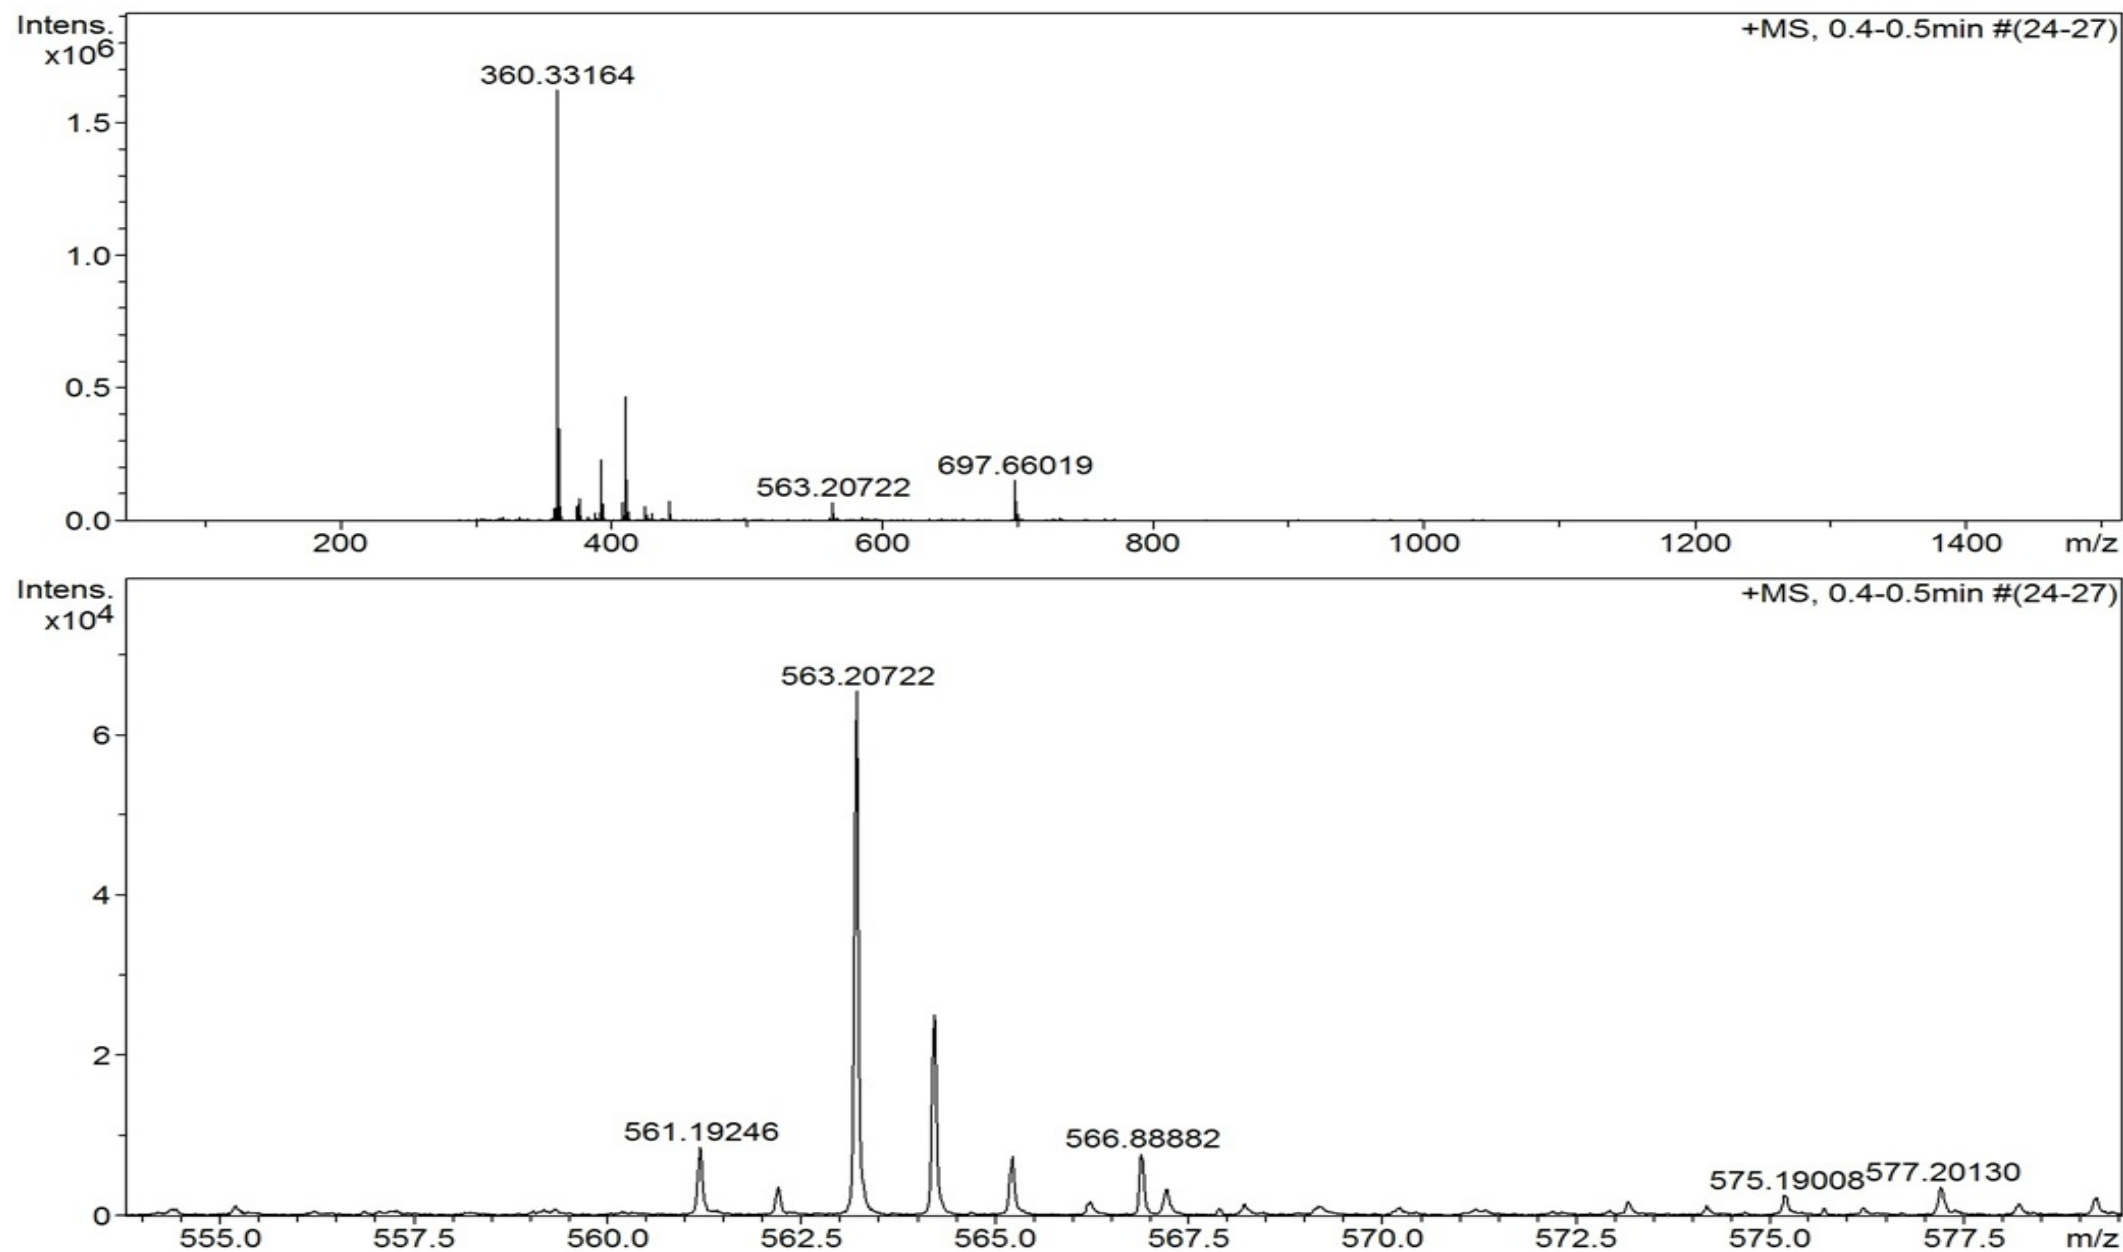

**Figure S1.** Positive mode HRESIMS spectrum of compound **1**



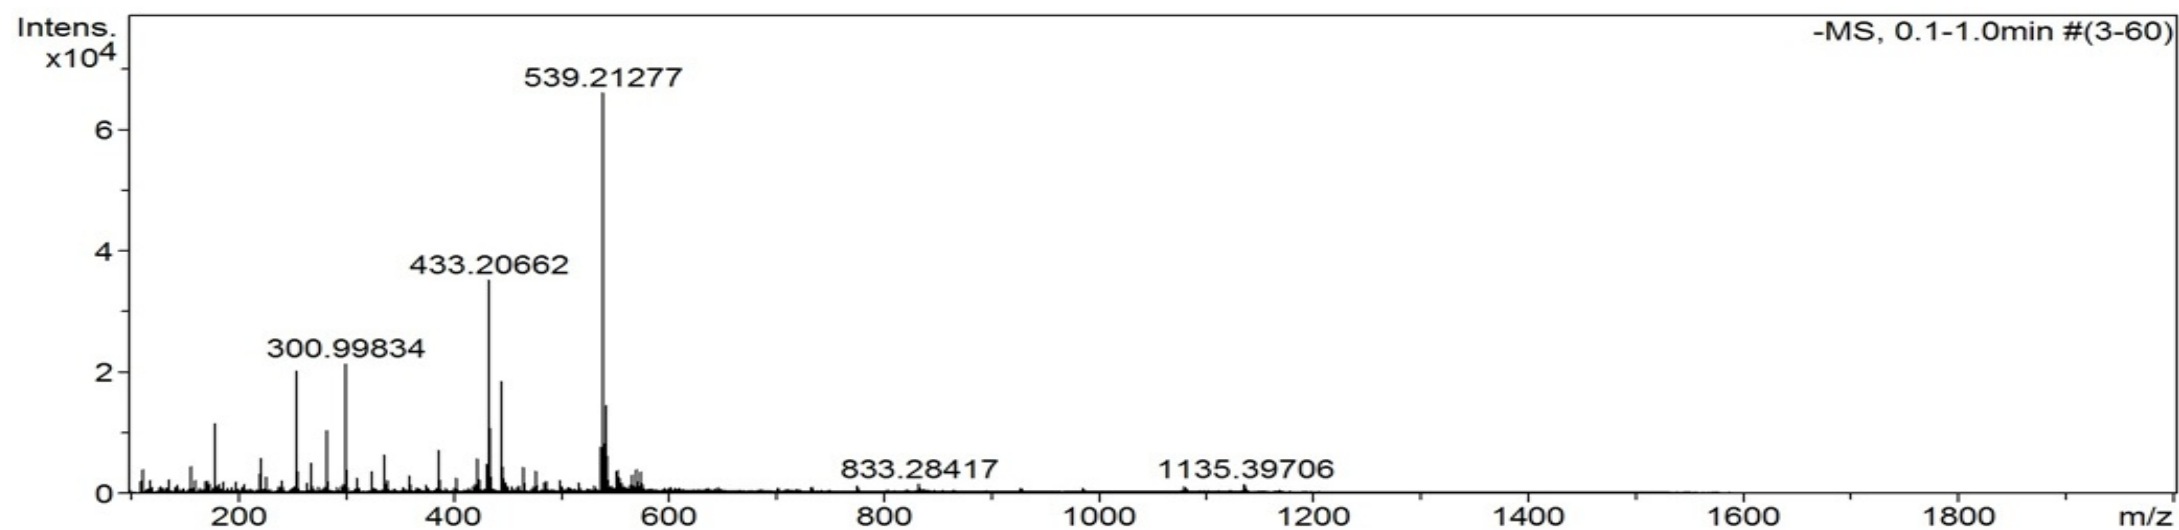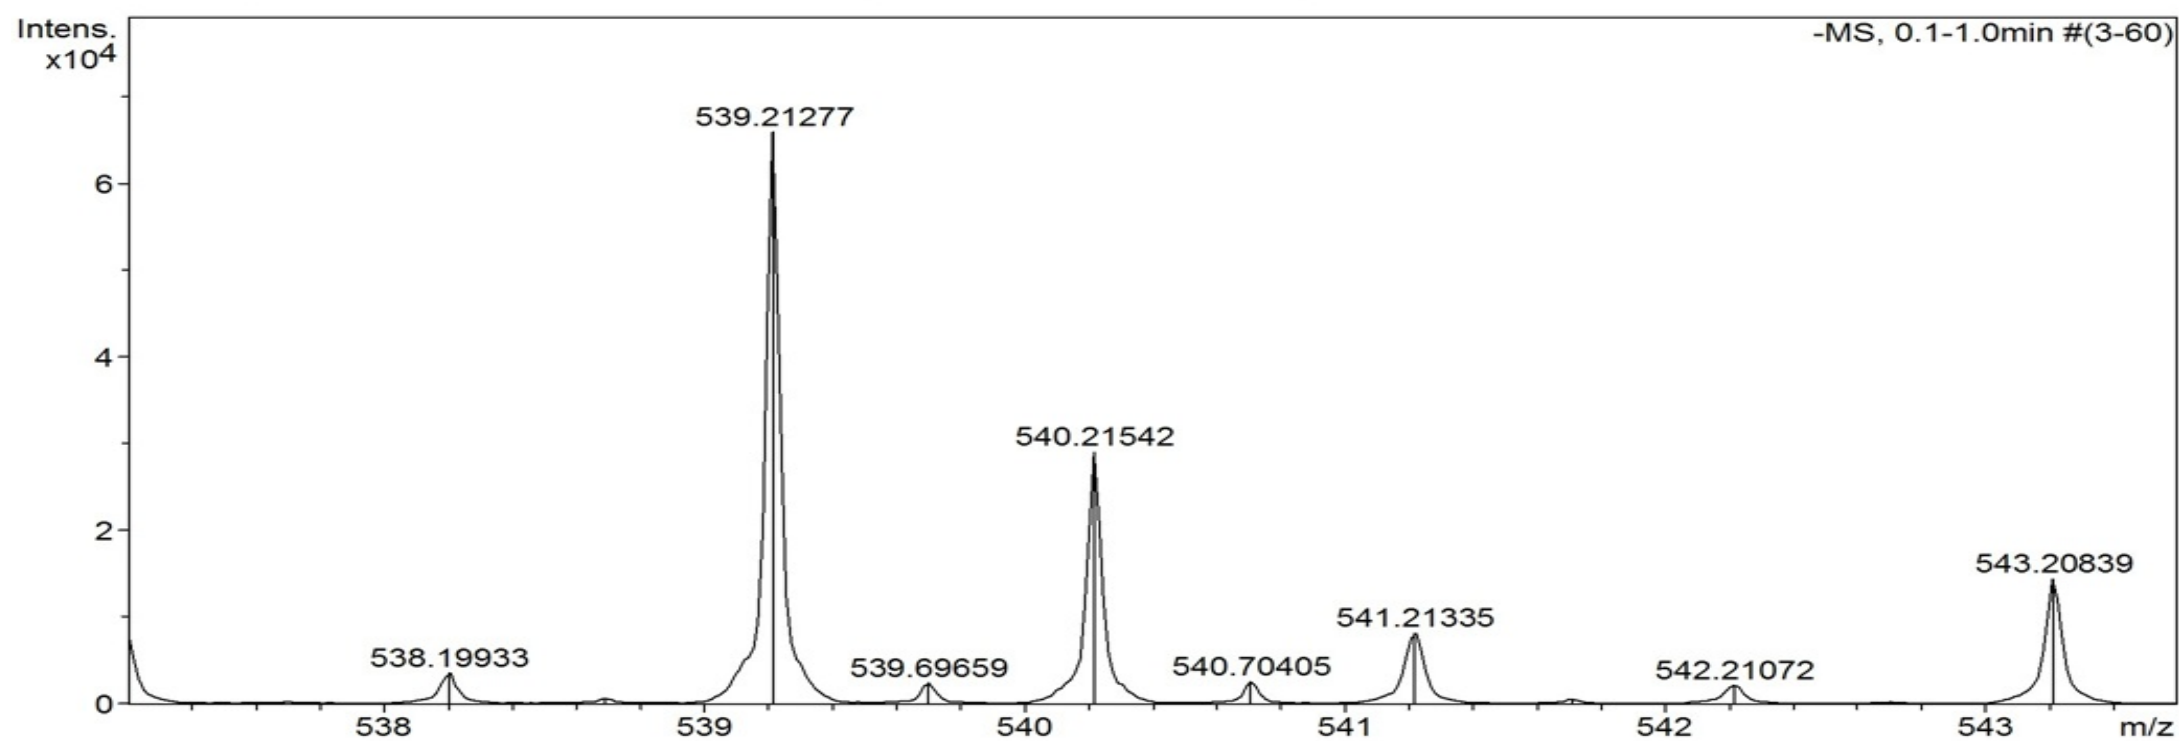

**Figure S2.** Negative mode HRESIMS spectrum of compound **1**

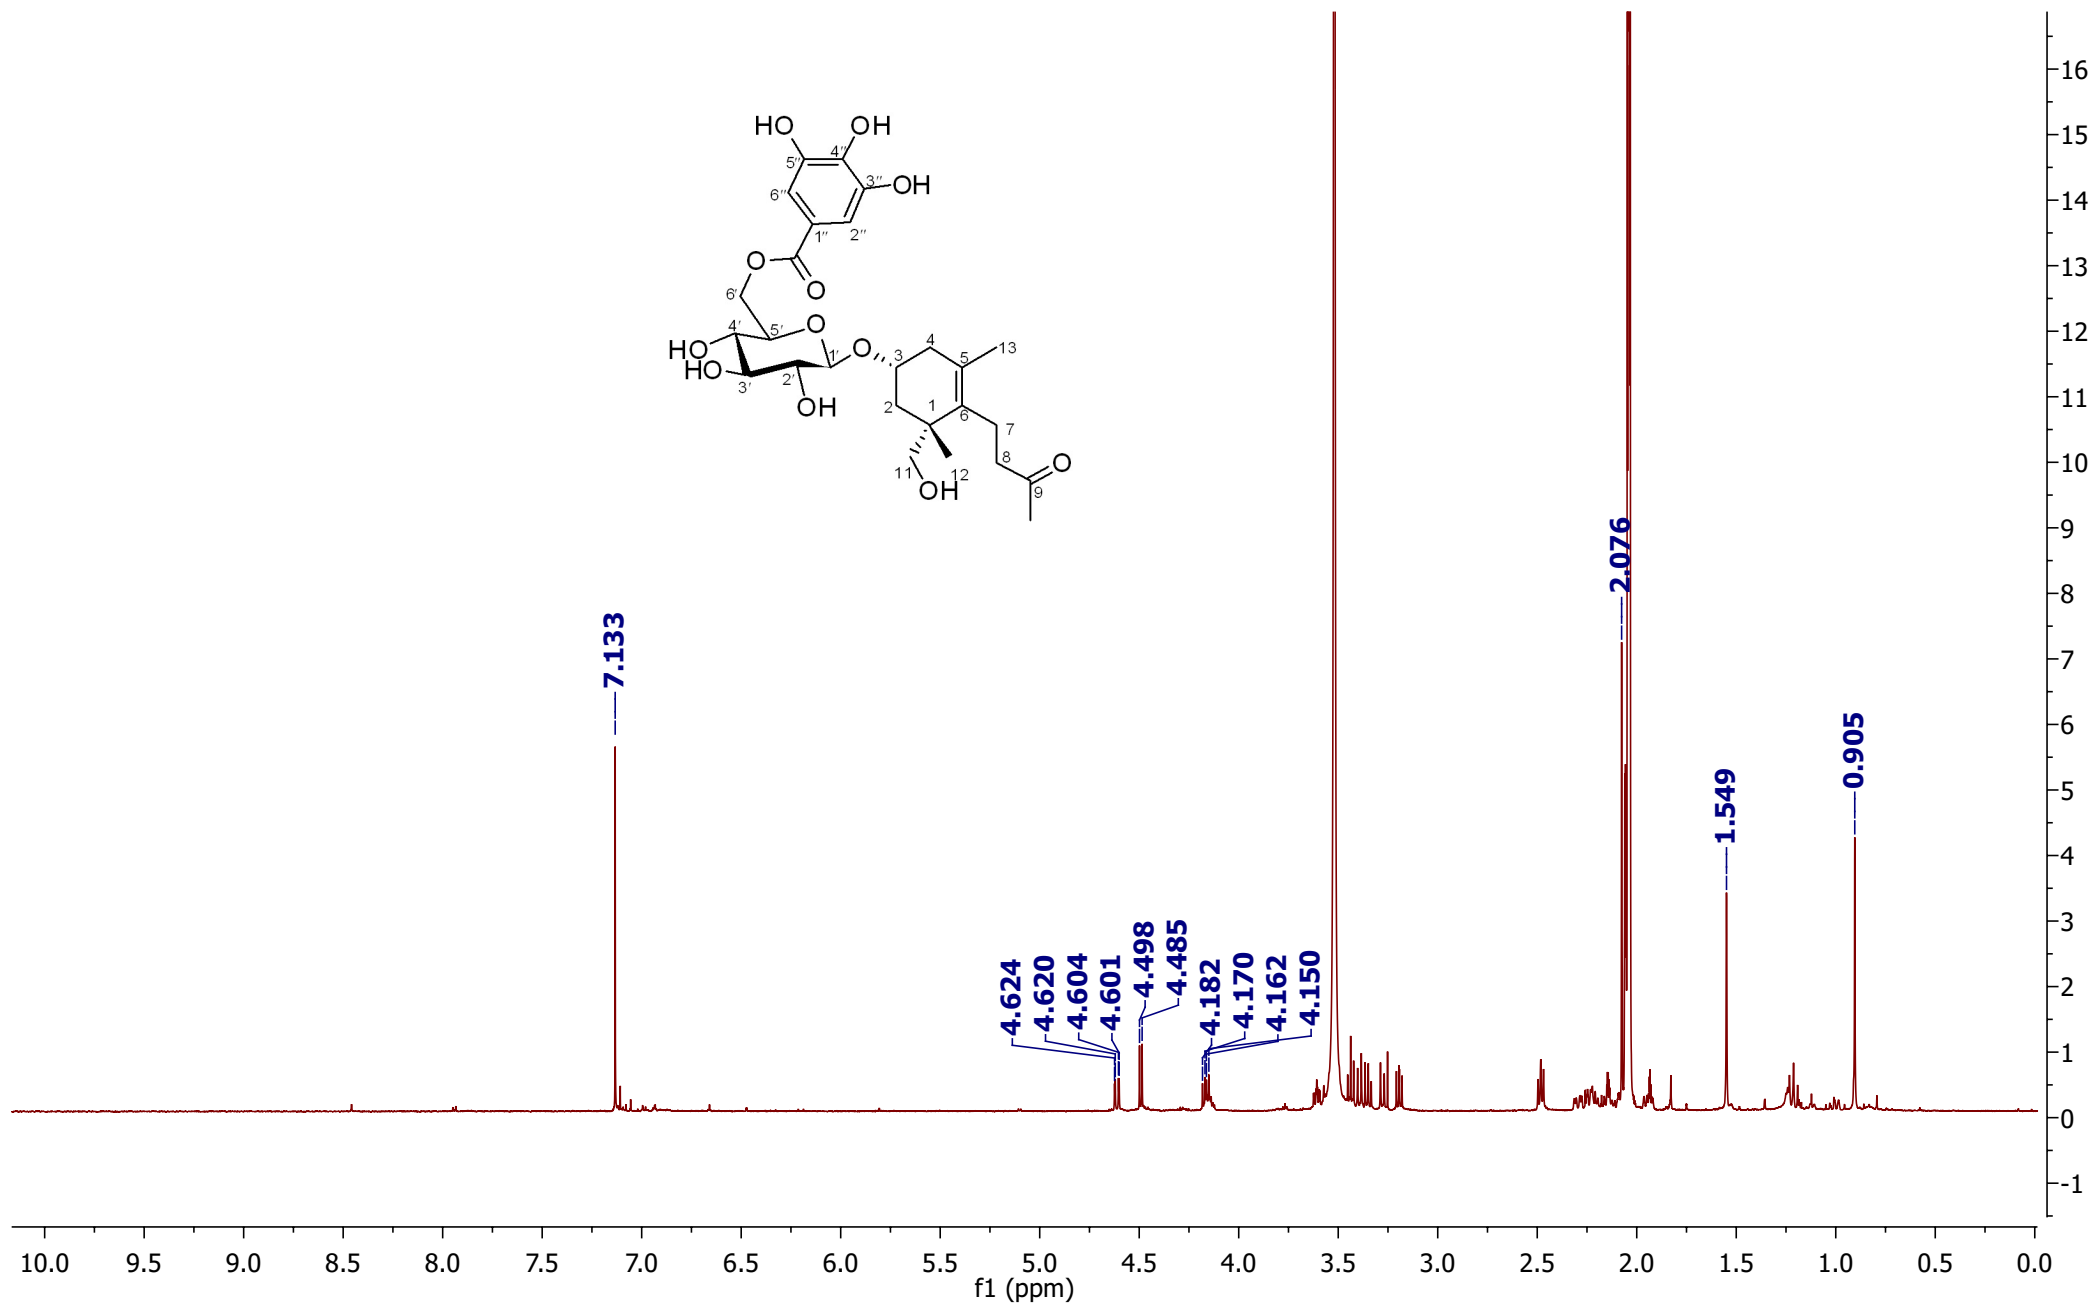

**Figure S3.**  $^1\text{H}$  NMR spectrum of compound **1** [600 MHz, acetone- $d_6$  +  $\text{D}_2\text{O}$  (9+1)]

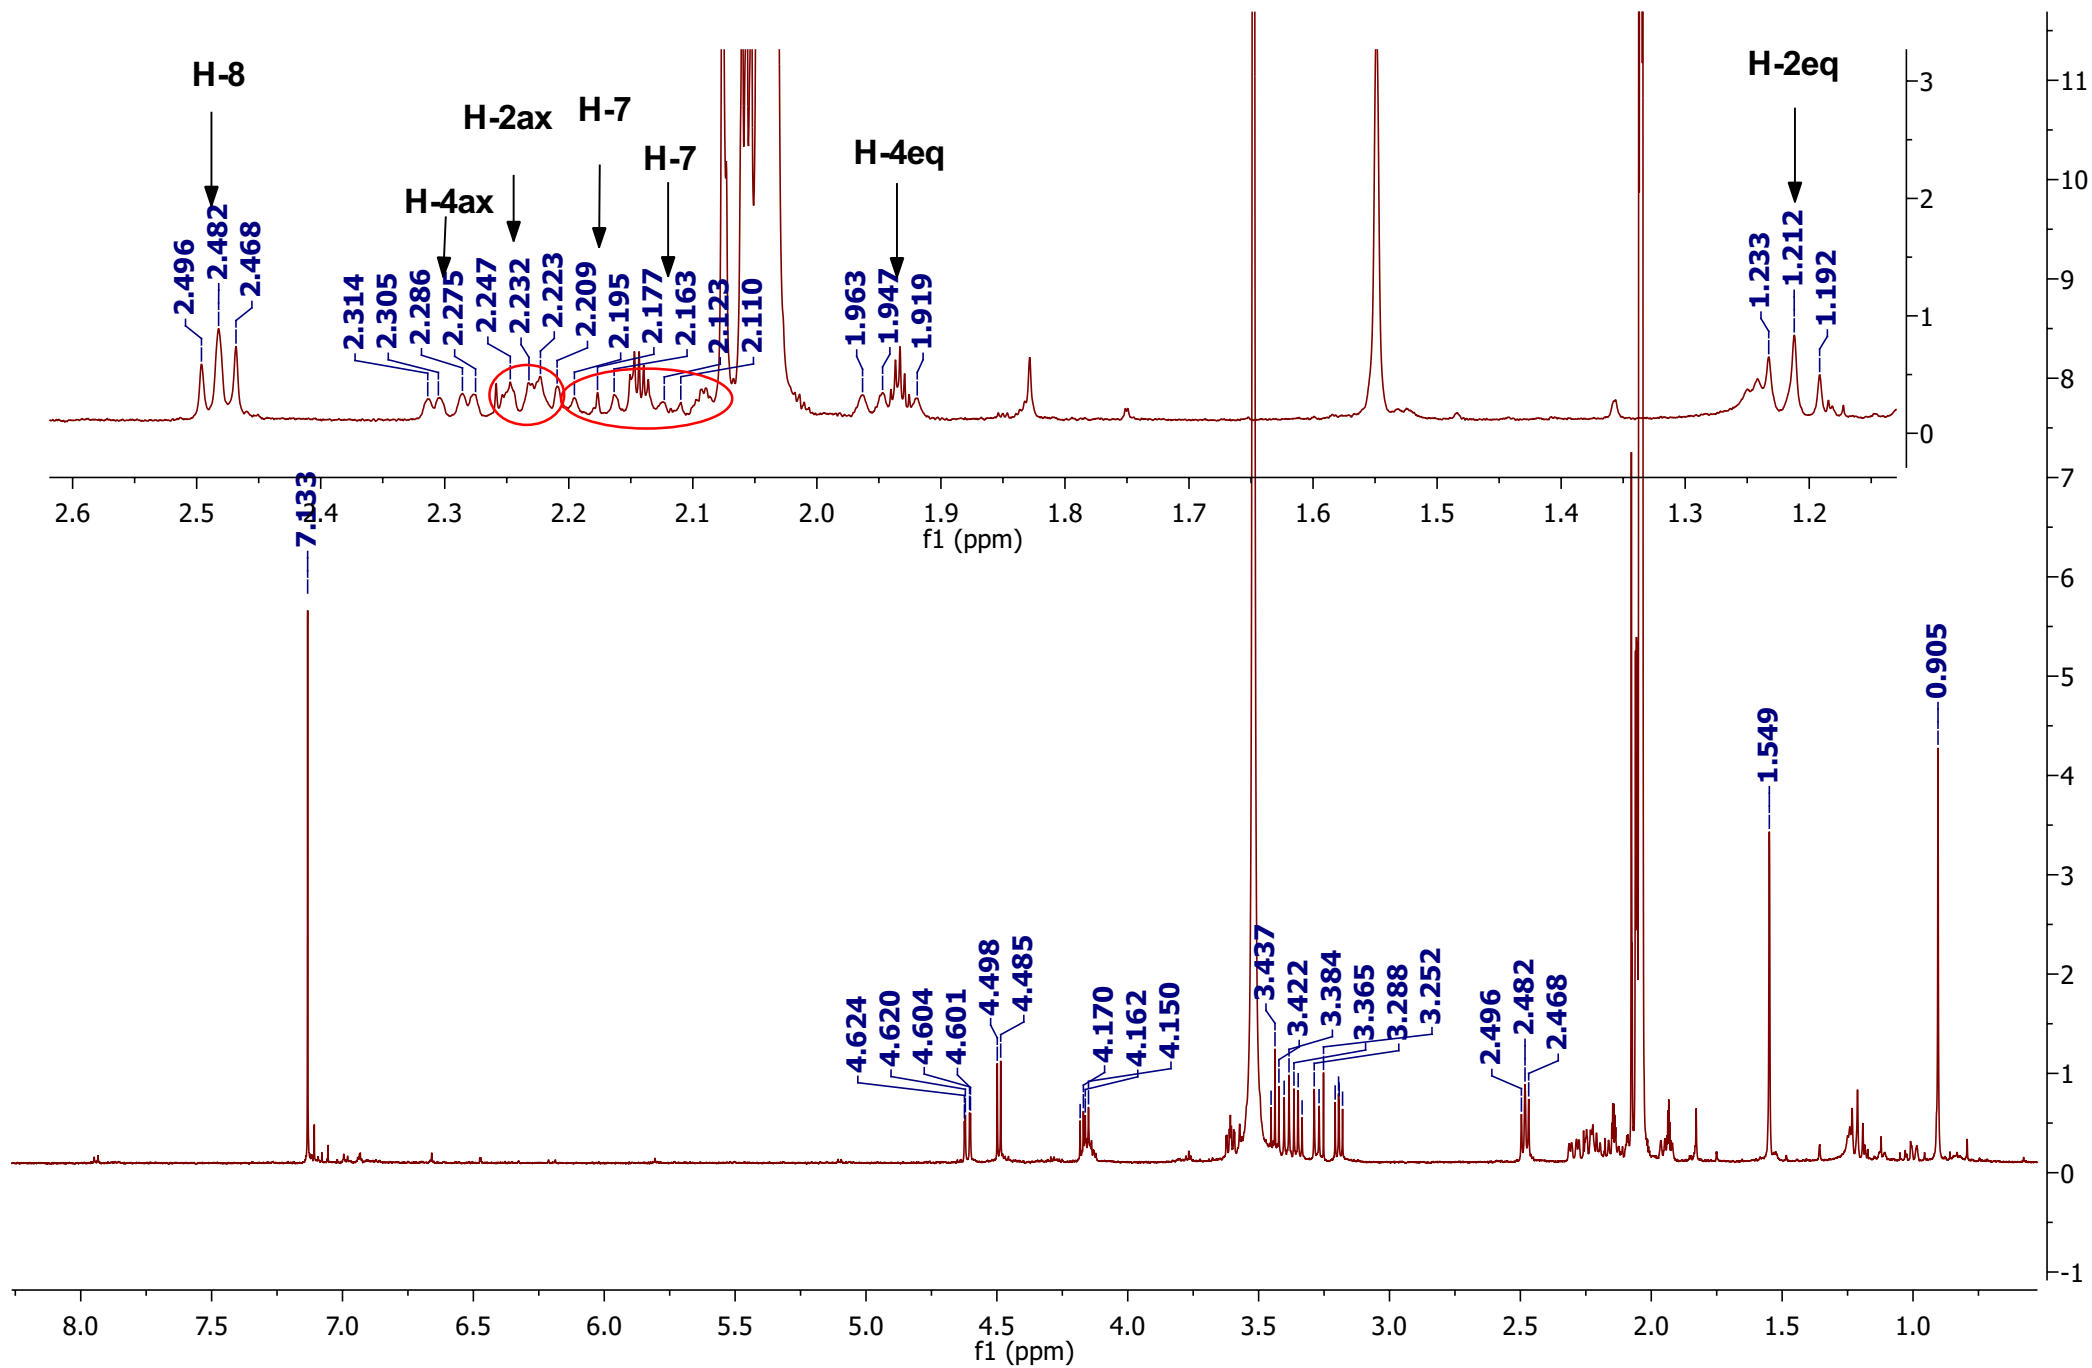

**Figure S4.** Expanded  $^1\text{H}$  NMR spectrum of compound **1** [600 MHz, acetone- $d_6$  +  $\text{D}_2\text{O}$  (9+1)]

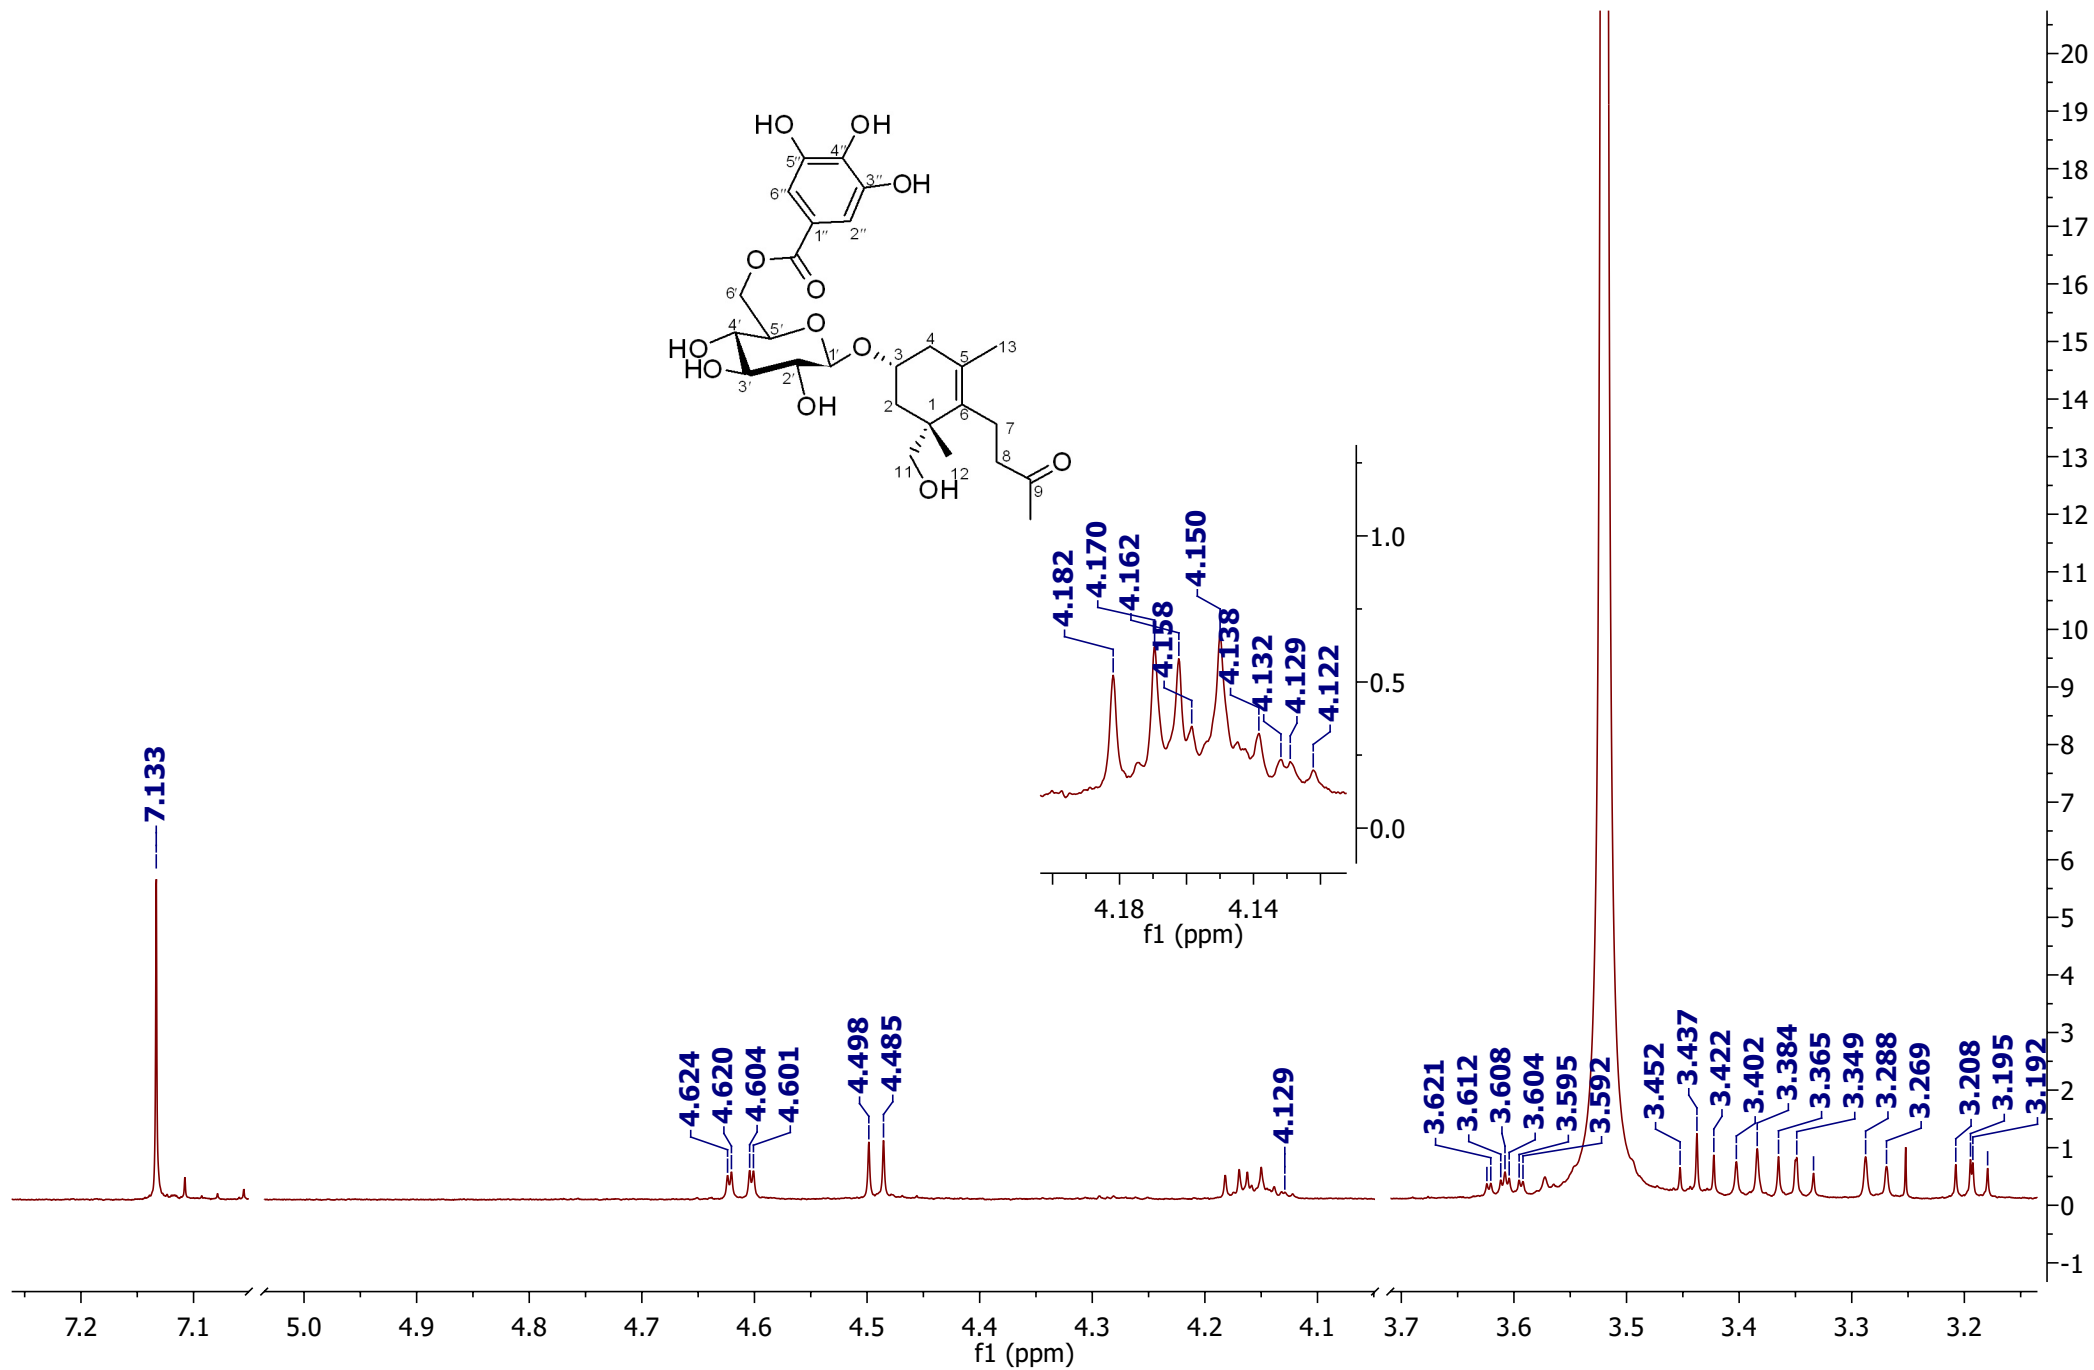

**Figure S5.** Expanded <sup>1</sup>H NMR spectrum of compound 1 [600 MHz, acetone-d<sub>6</sub> + D<sub>2</sub>O (9+1)]

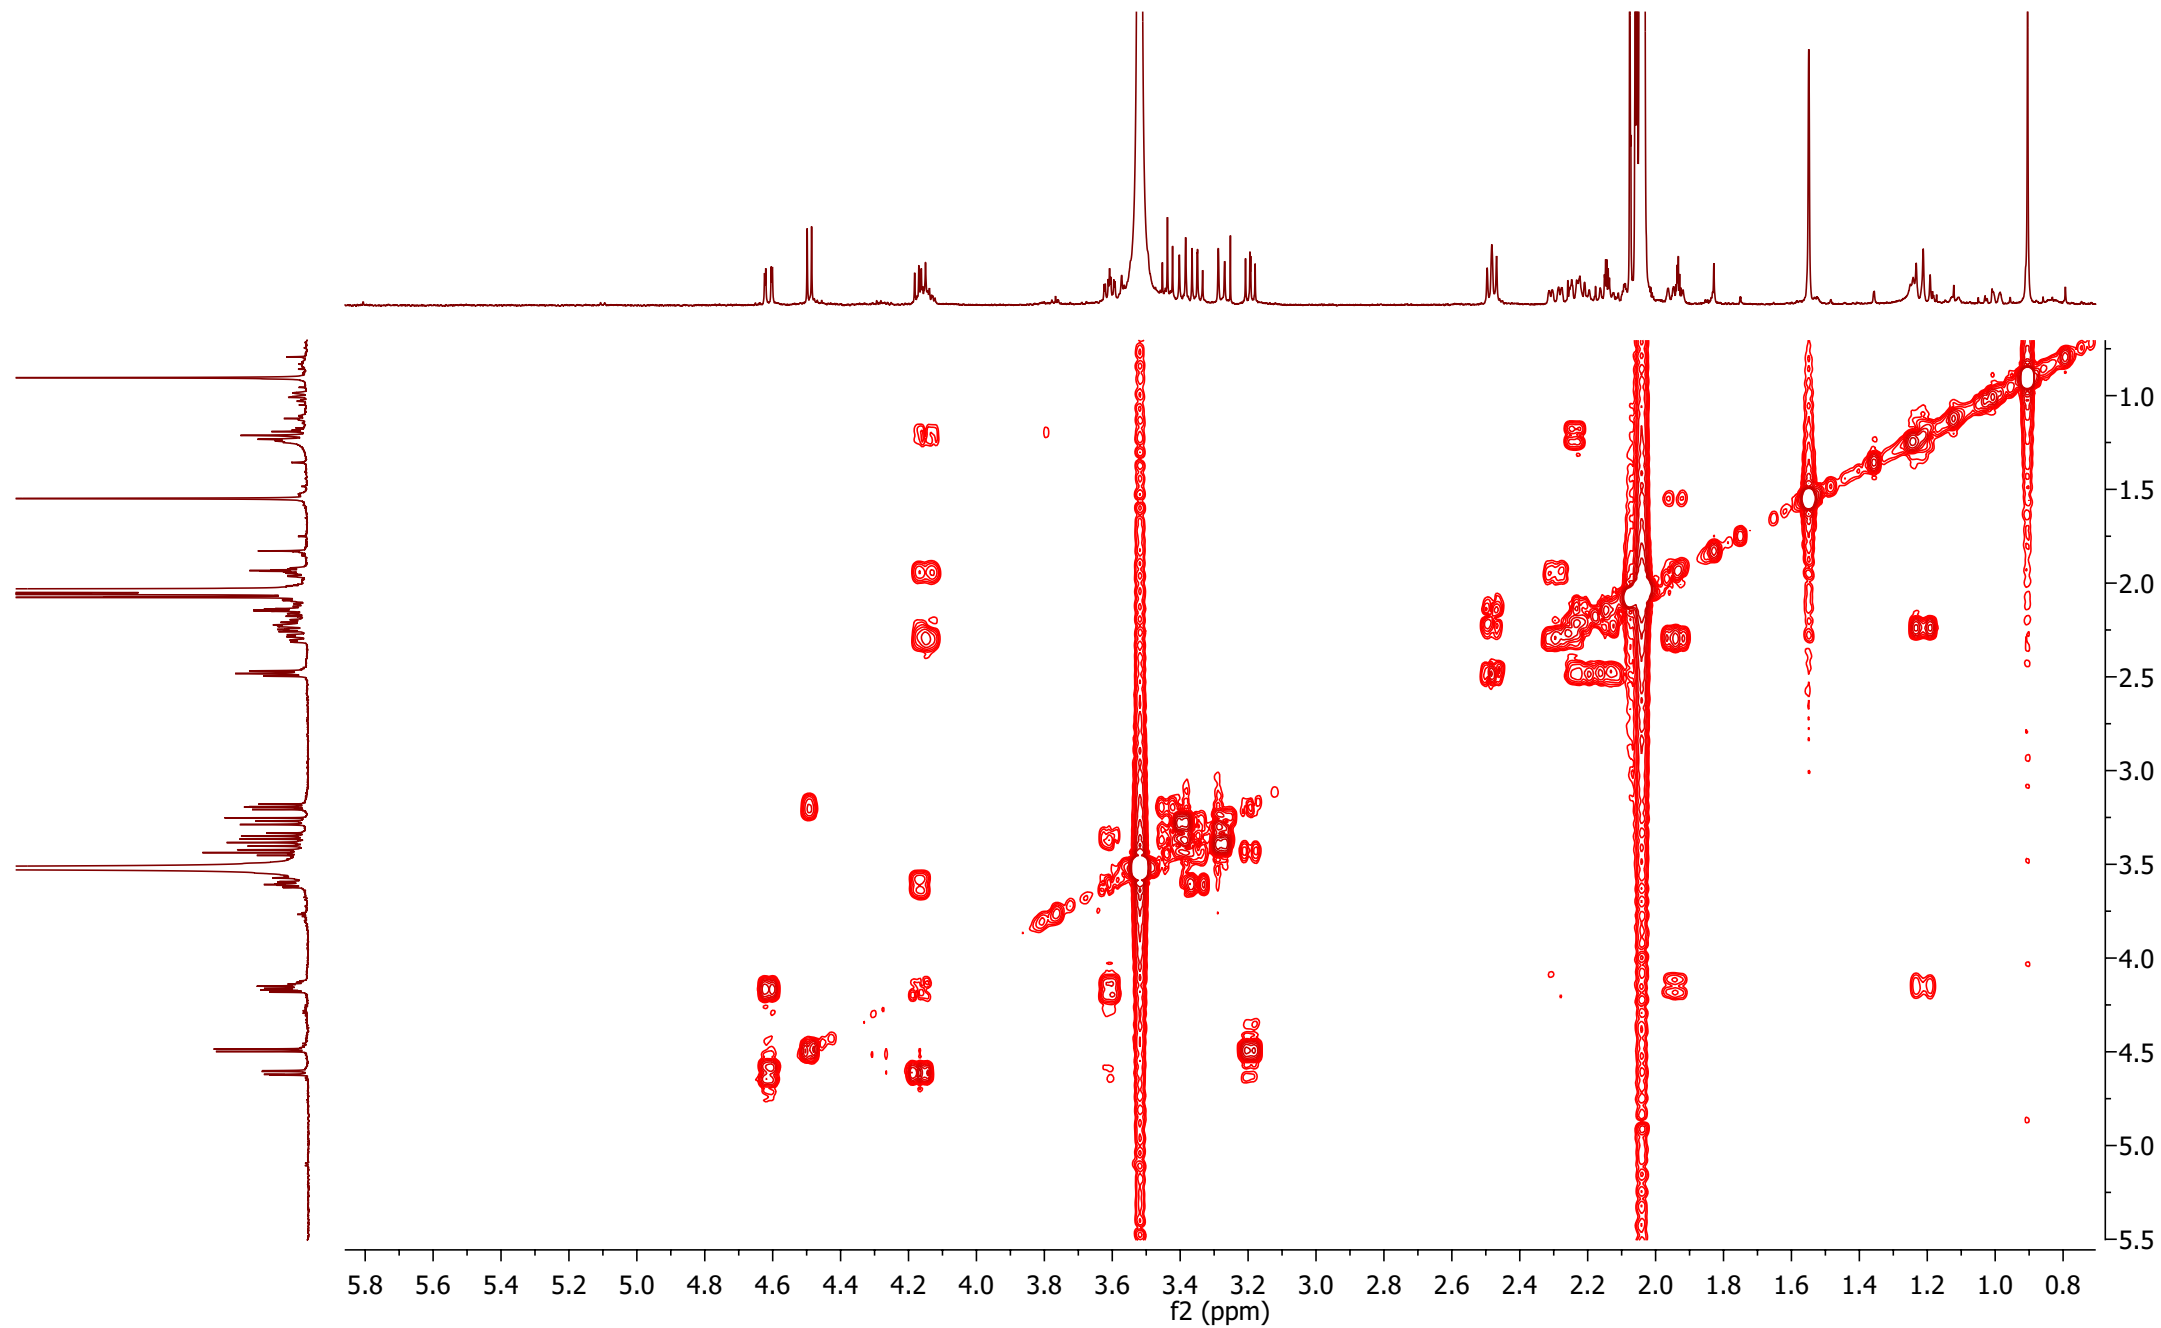

**Figure S6.**  $^1\text{H}$ - $^1\text{H}$  COSY spectrum of compound **1** [600 MHz, acetone- $d_6$  +  $\text{D}_2\text{O}$  (9+1)]

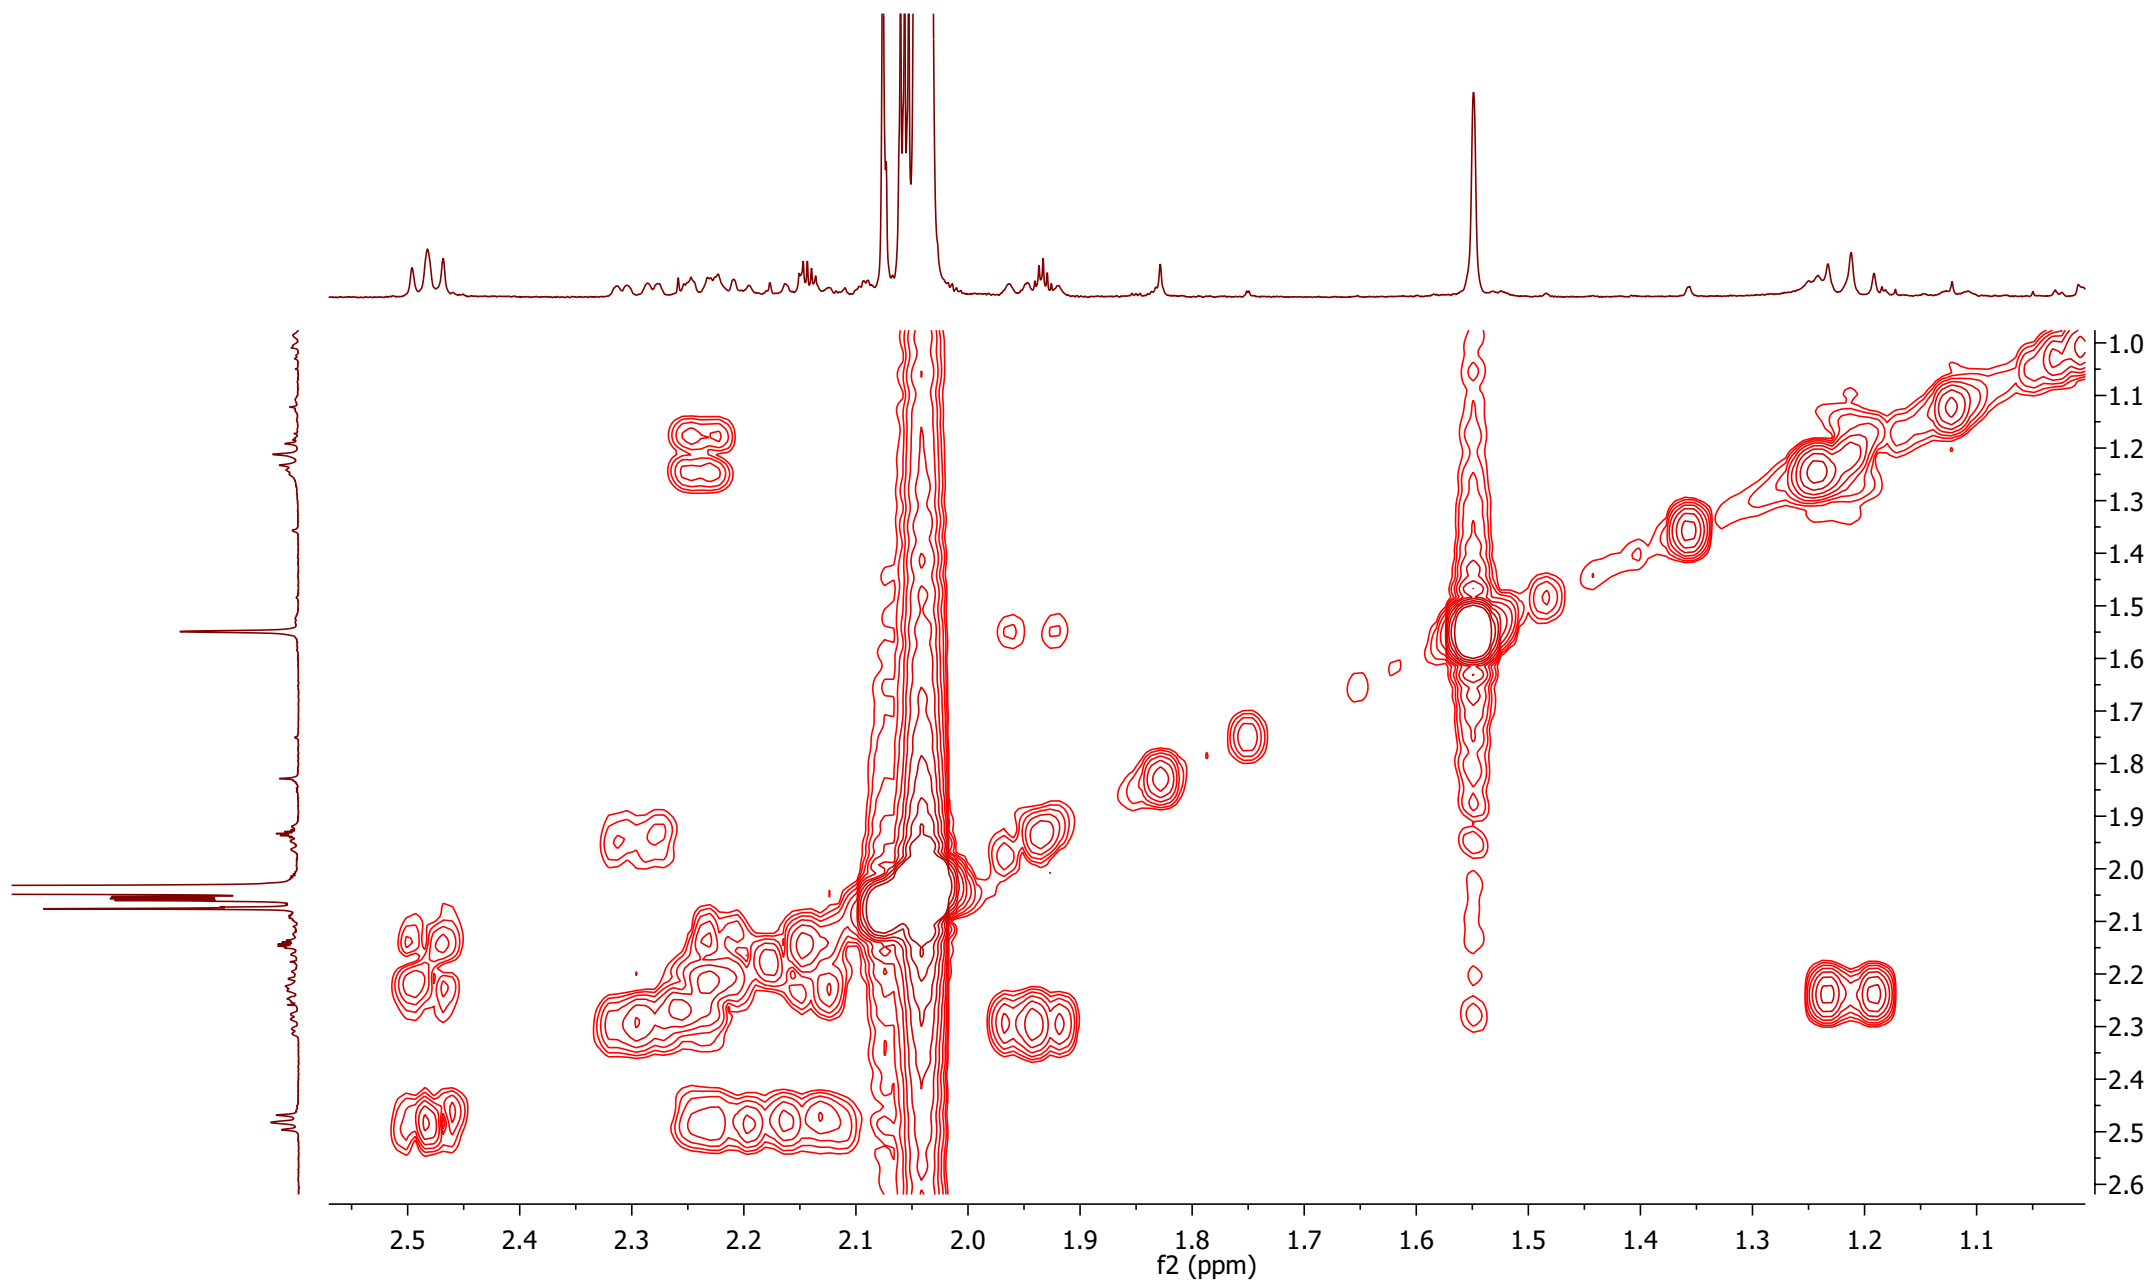

**Figure S7.** Expanded  $^1\text{H}$ - $^1\text{H}$  COSY spectrum of compound **1** [600 MHz, acetone- $d_6$  +  $\text{D}_2\text{O}$  (9+1)]

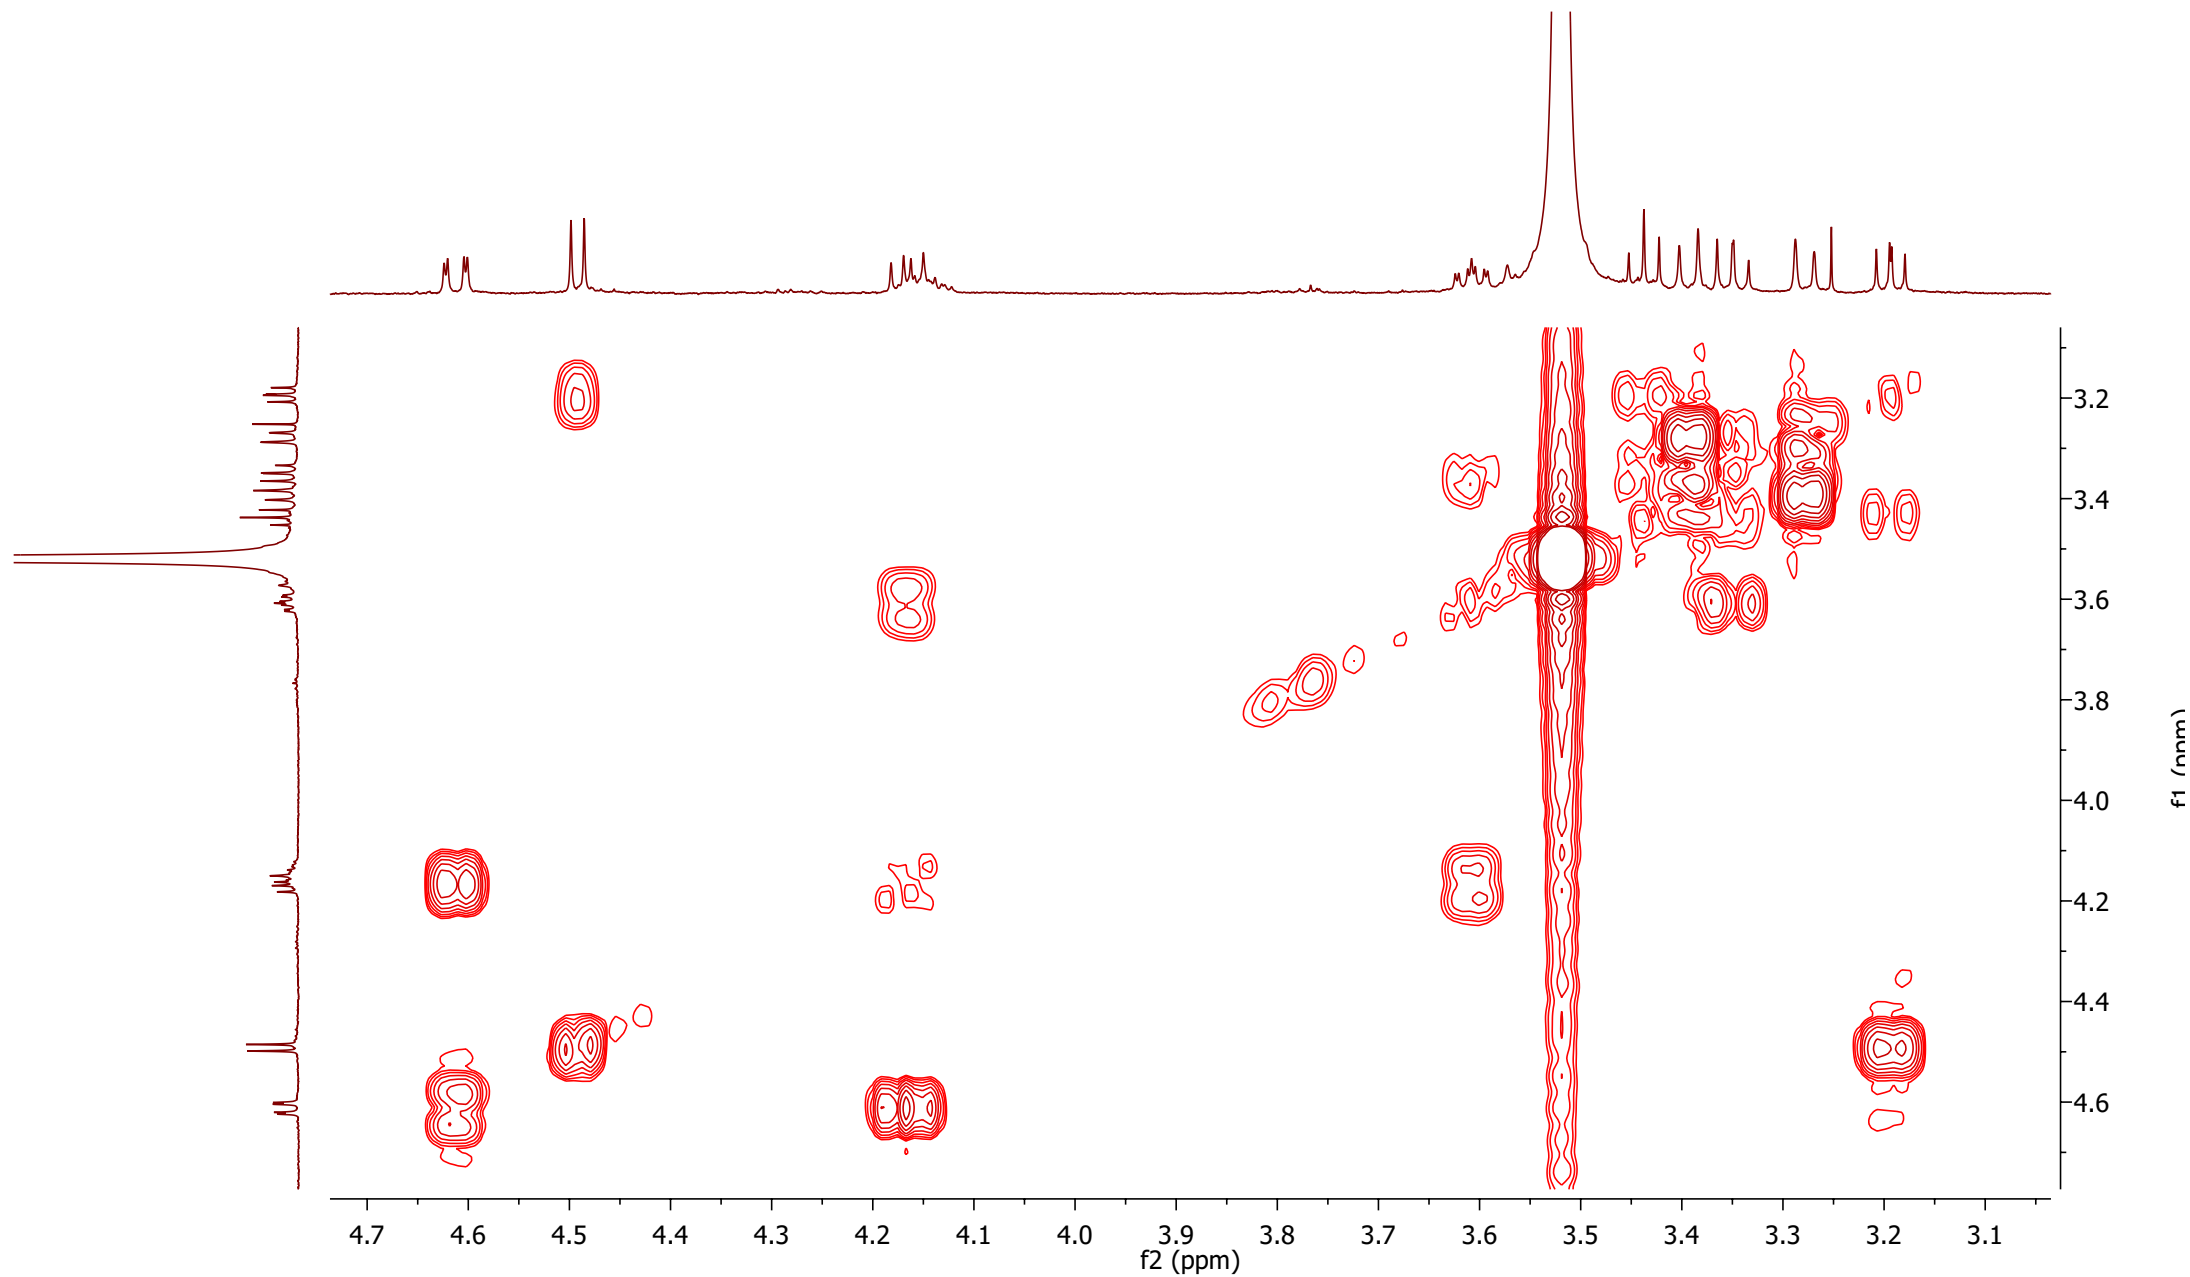

**Figure S8.** Expanded  $^1\text{H}$ - $^1\text{H}$  COSY spectrum of compound **1** [600 MHz, acetone- $d_6$  +  $\text{D}_2\text{O}$  (9+1)]





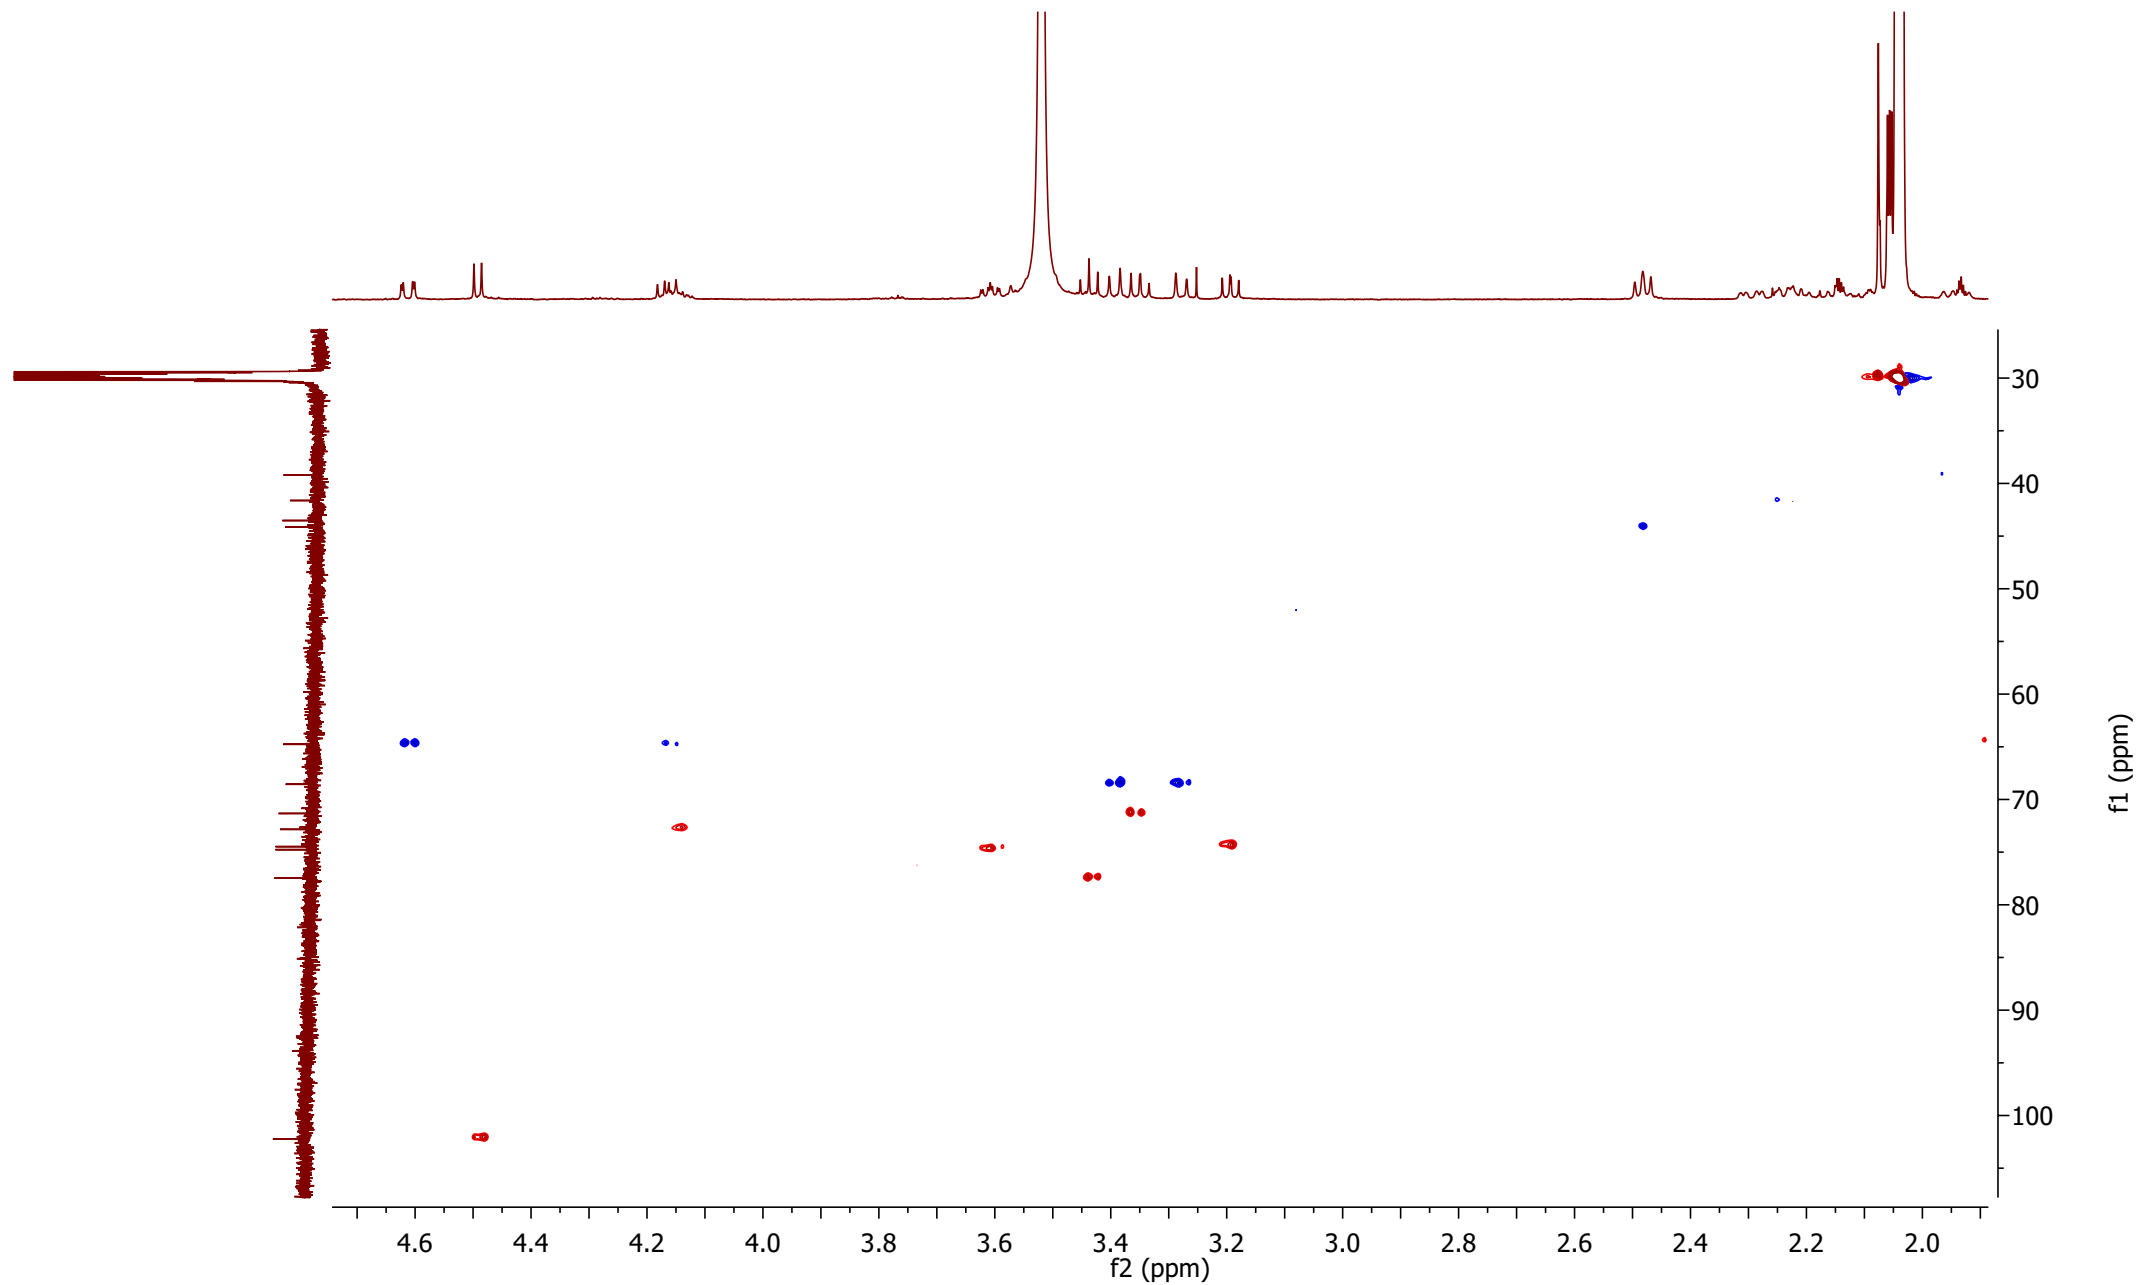

**Figure S10.** HSQC spectrum of compound **1** [600 MHz, acetone- $d_6$  + D $_2$ O (9+1)]

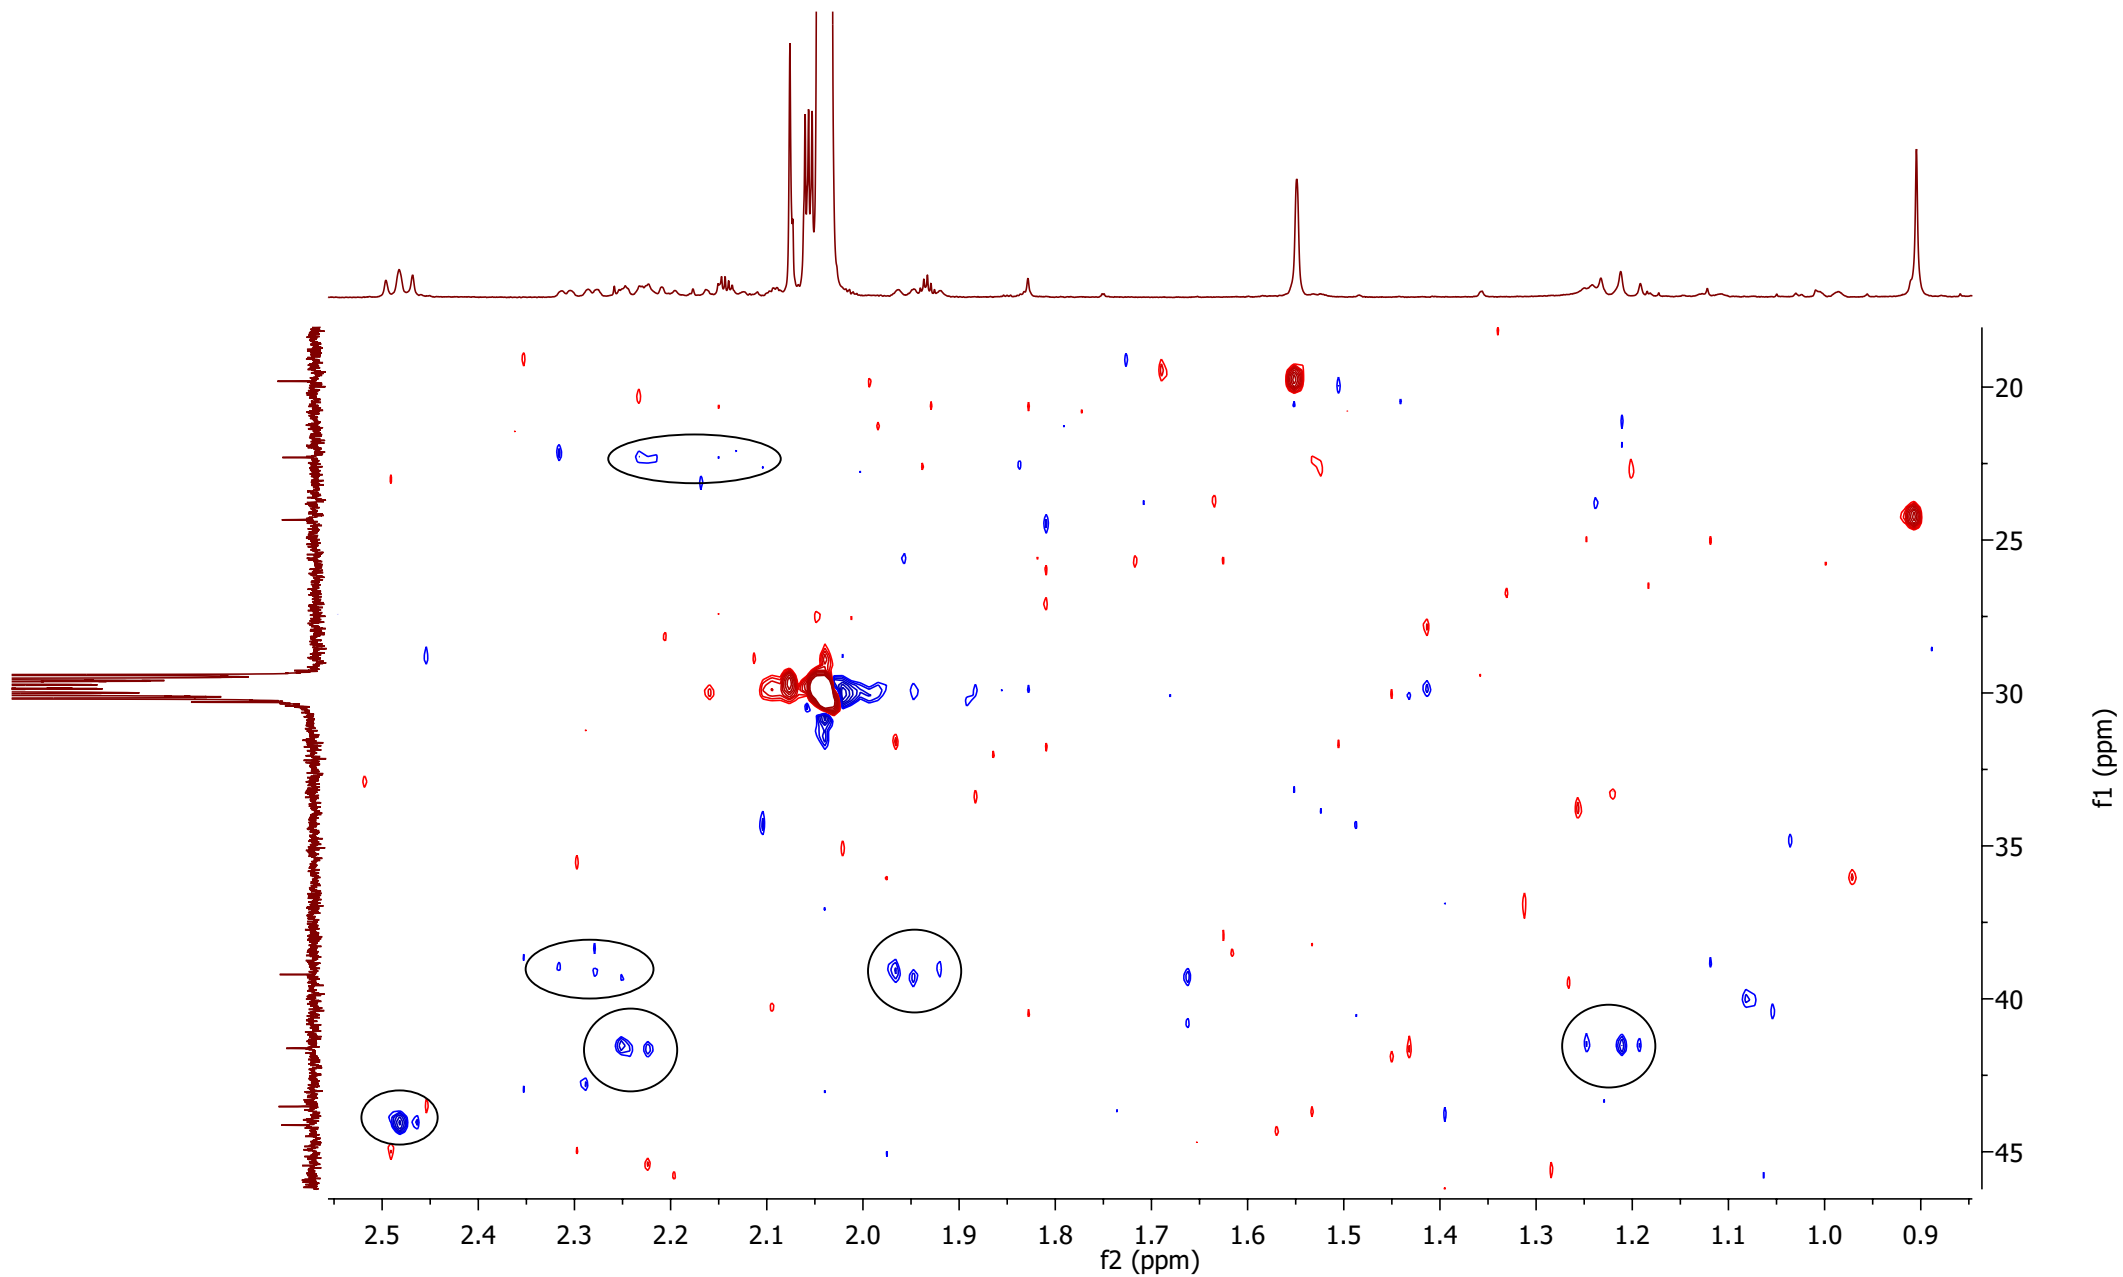

**Figure S11.** Expanded HSQC spectrum of compound **1** [600 MHz, acetone- $d_6$  + D<sub>2</sub>O (9+1)]

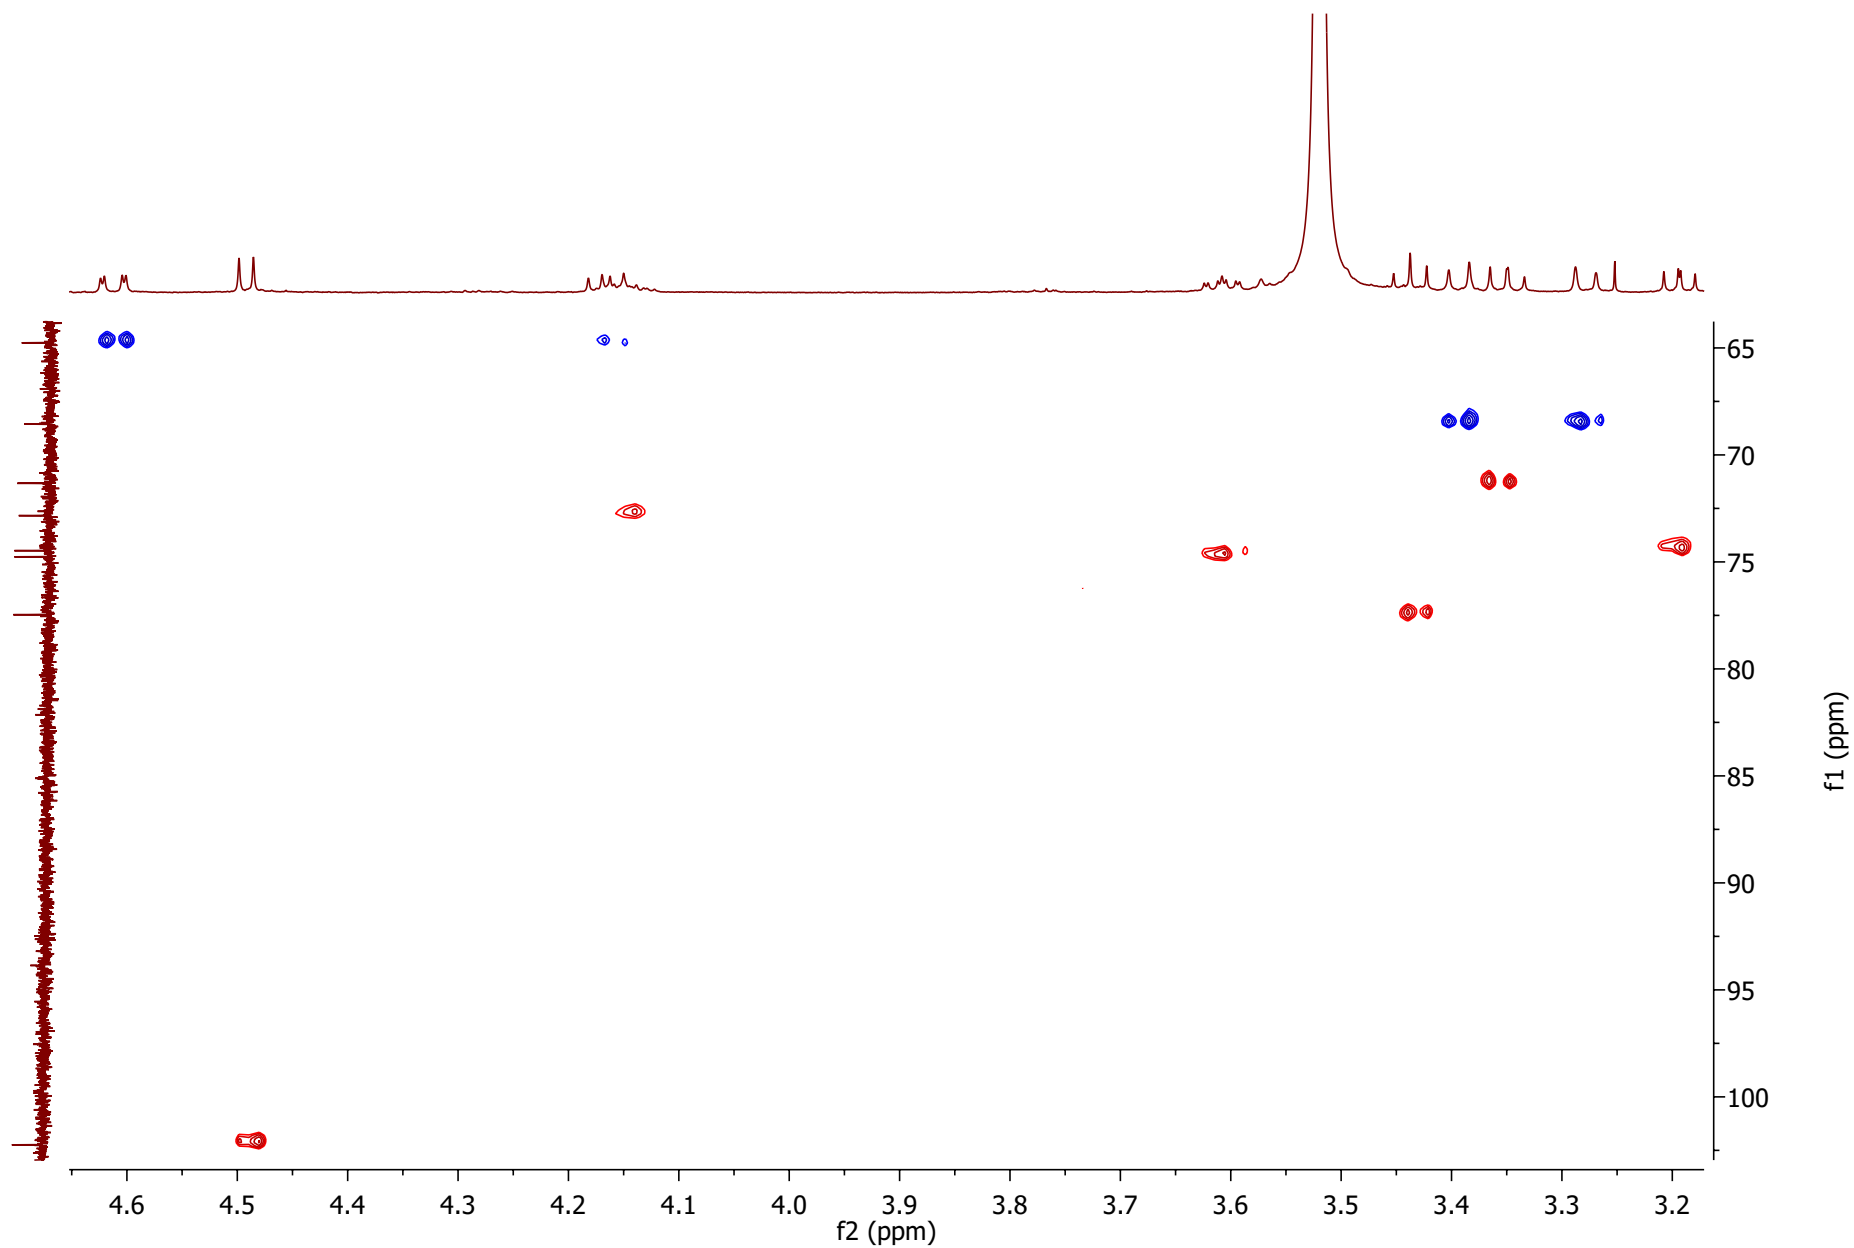

**Figure S12.** Expanded HSQC spectrum of compound **1** [600 MHz, acetone- $d_6$  +  $\text{D}_2\text{O}$  (9+1)]

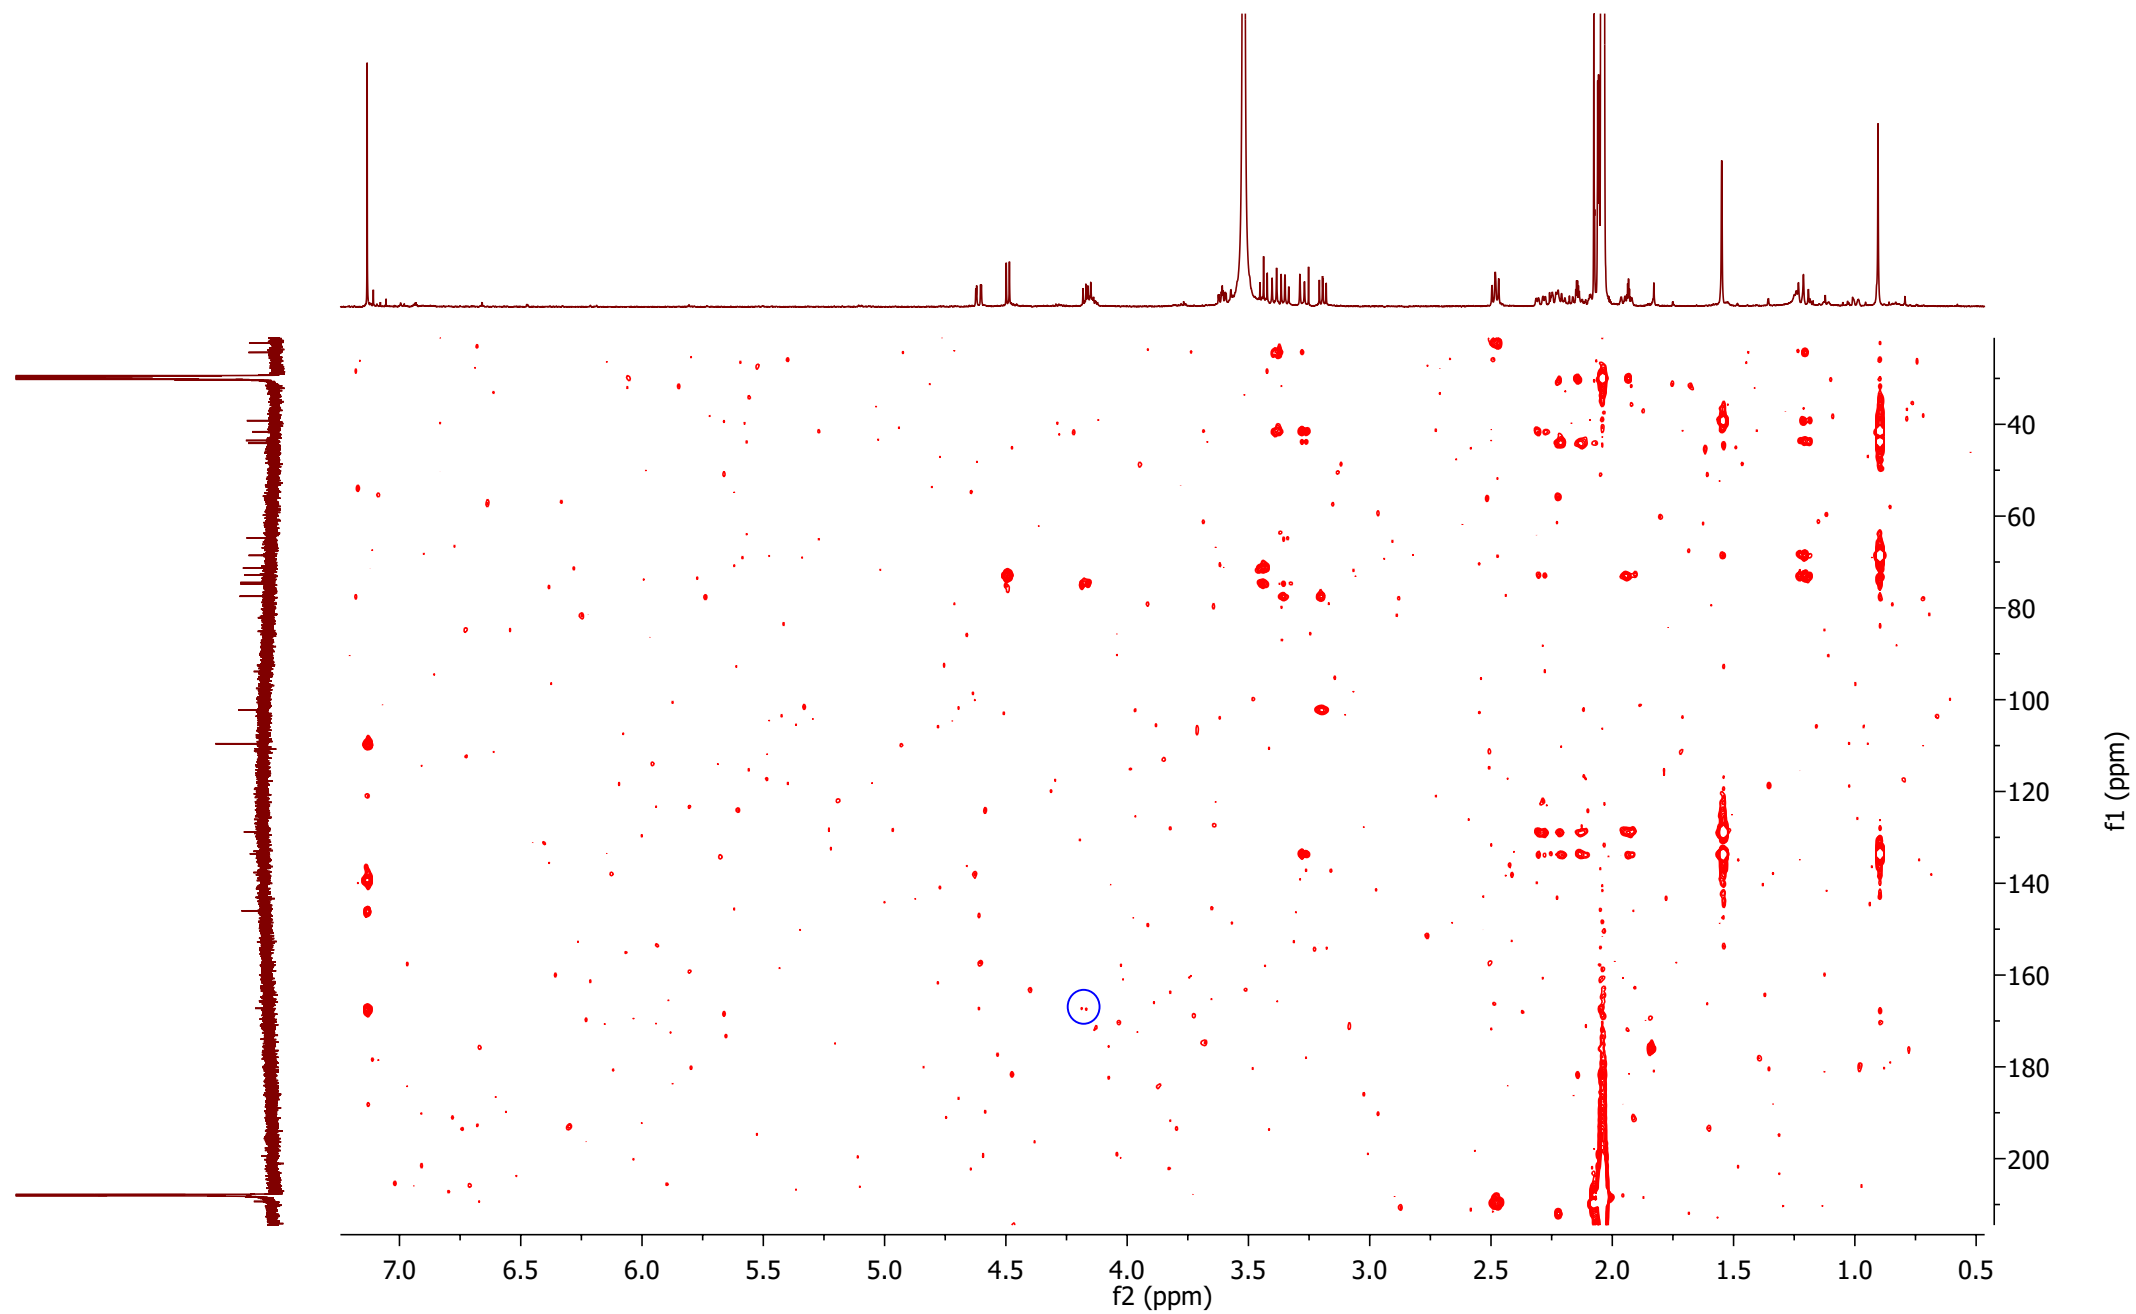

**Figure S13.** HMBC spectrum of compound **1** [600 MHz, acetone- $d_6$  + D $_2$ O (9+1)]

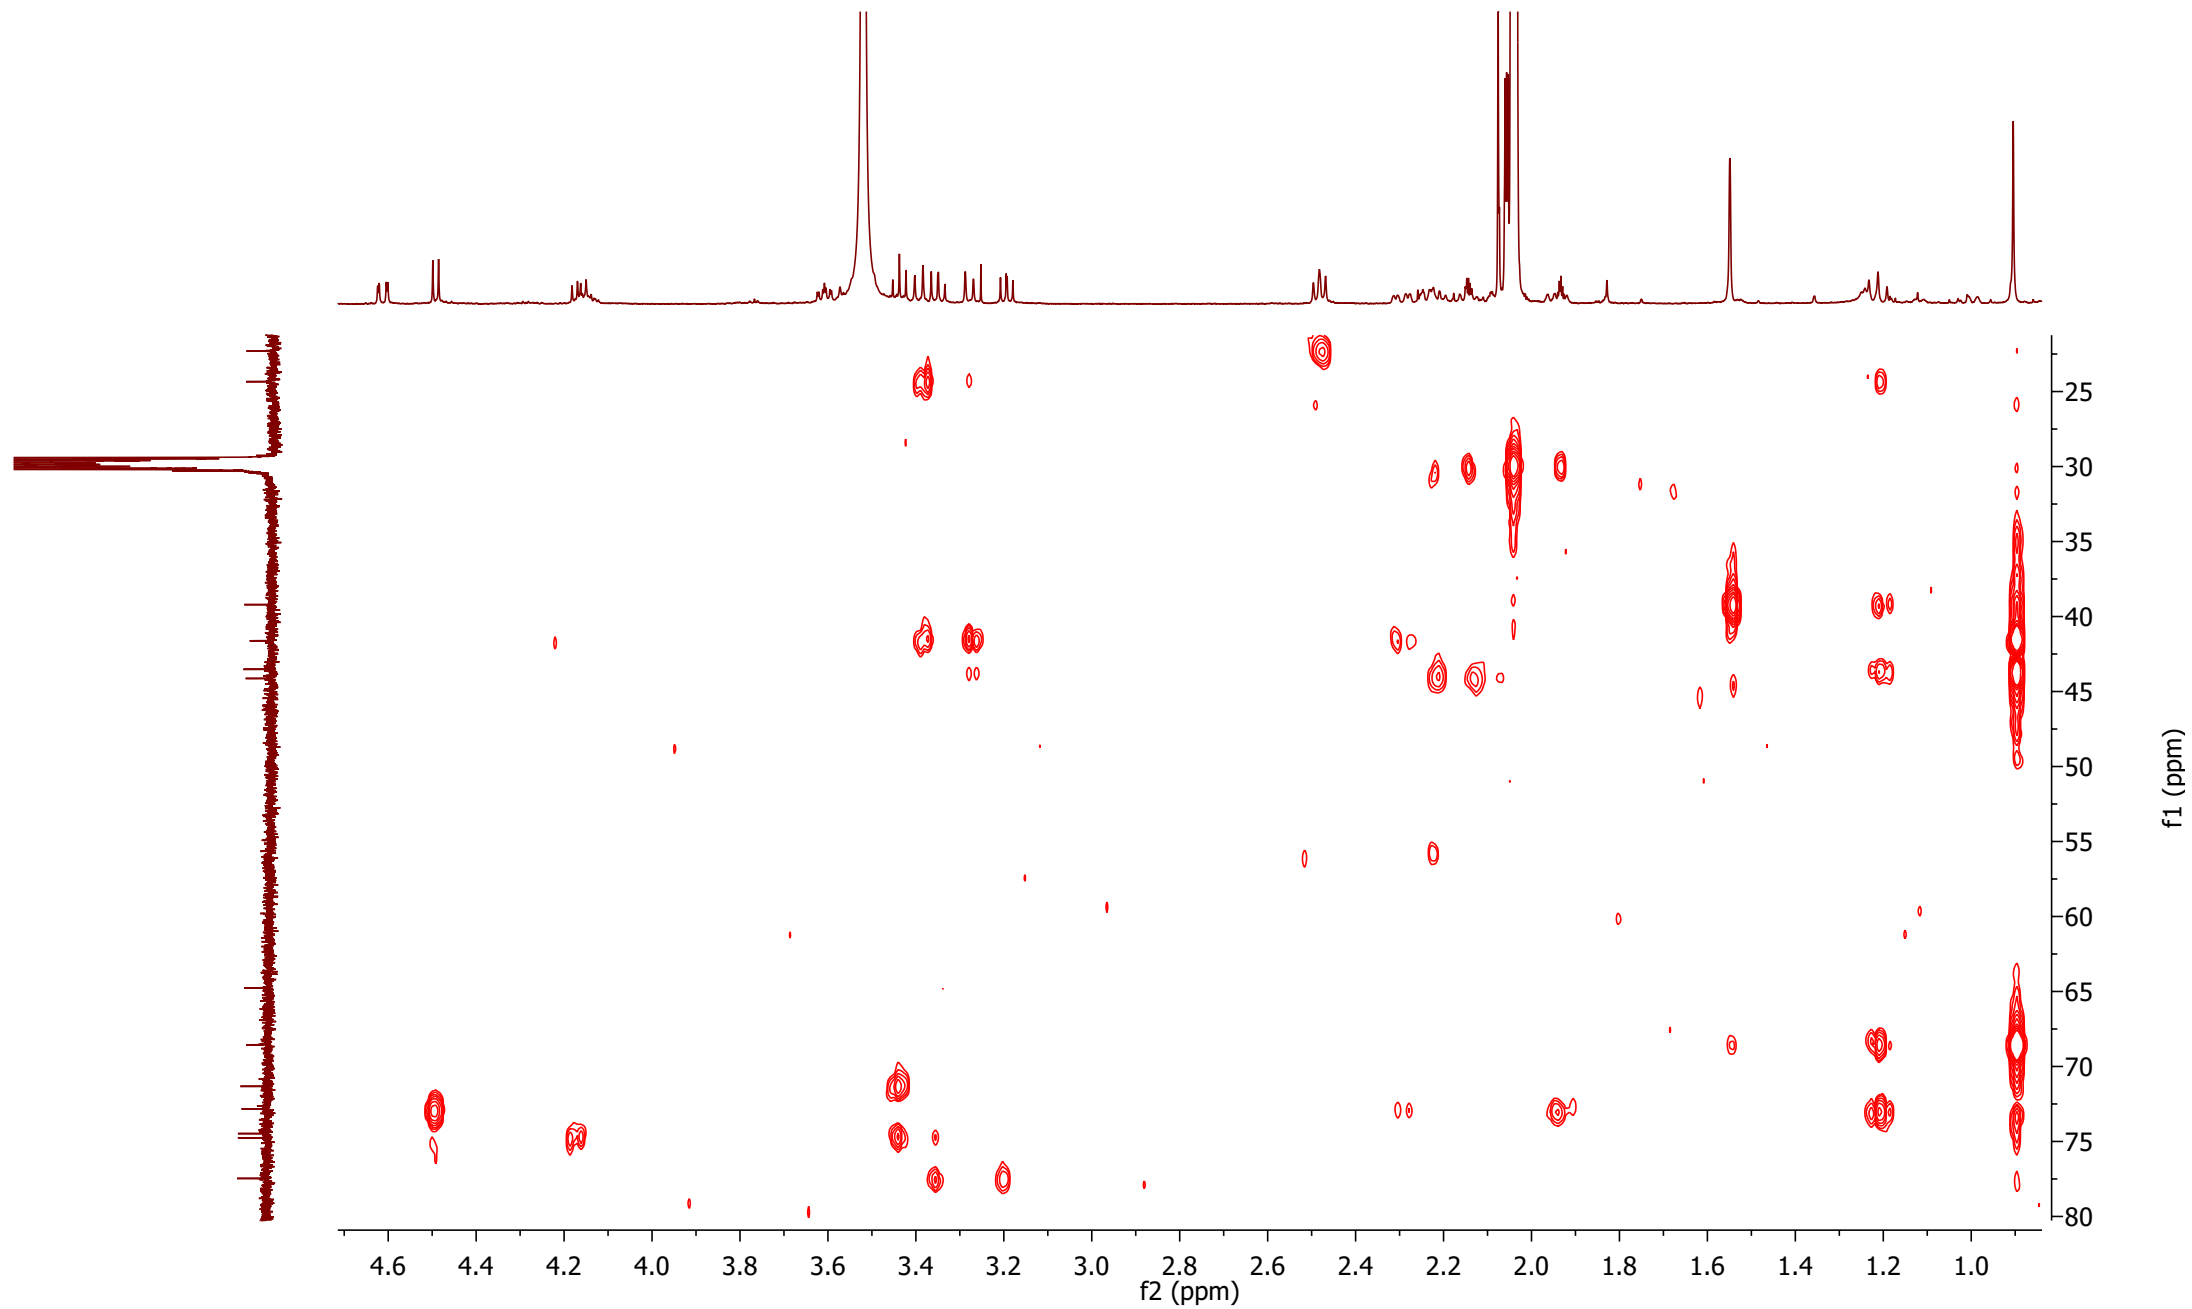

**Figure S14.** Expanded HMBC spectrum of compound **1** [600 MHz, acetone-*d*<sub>6</sub> + D<sub>2</sub>O (9+1)]

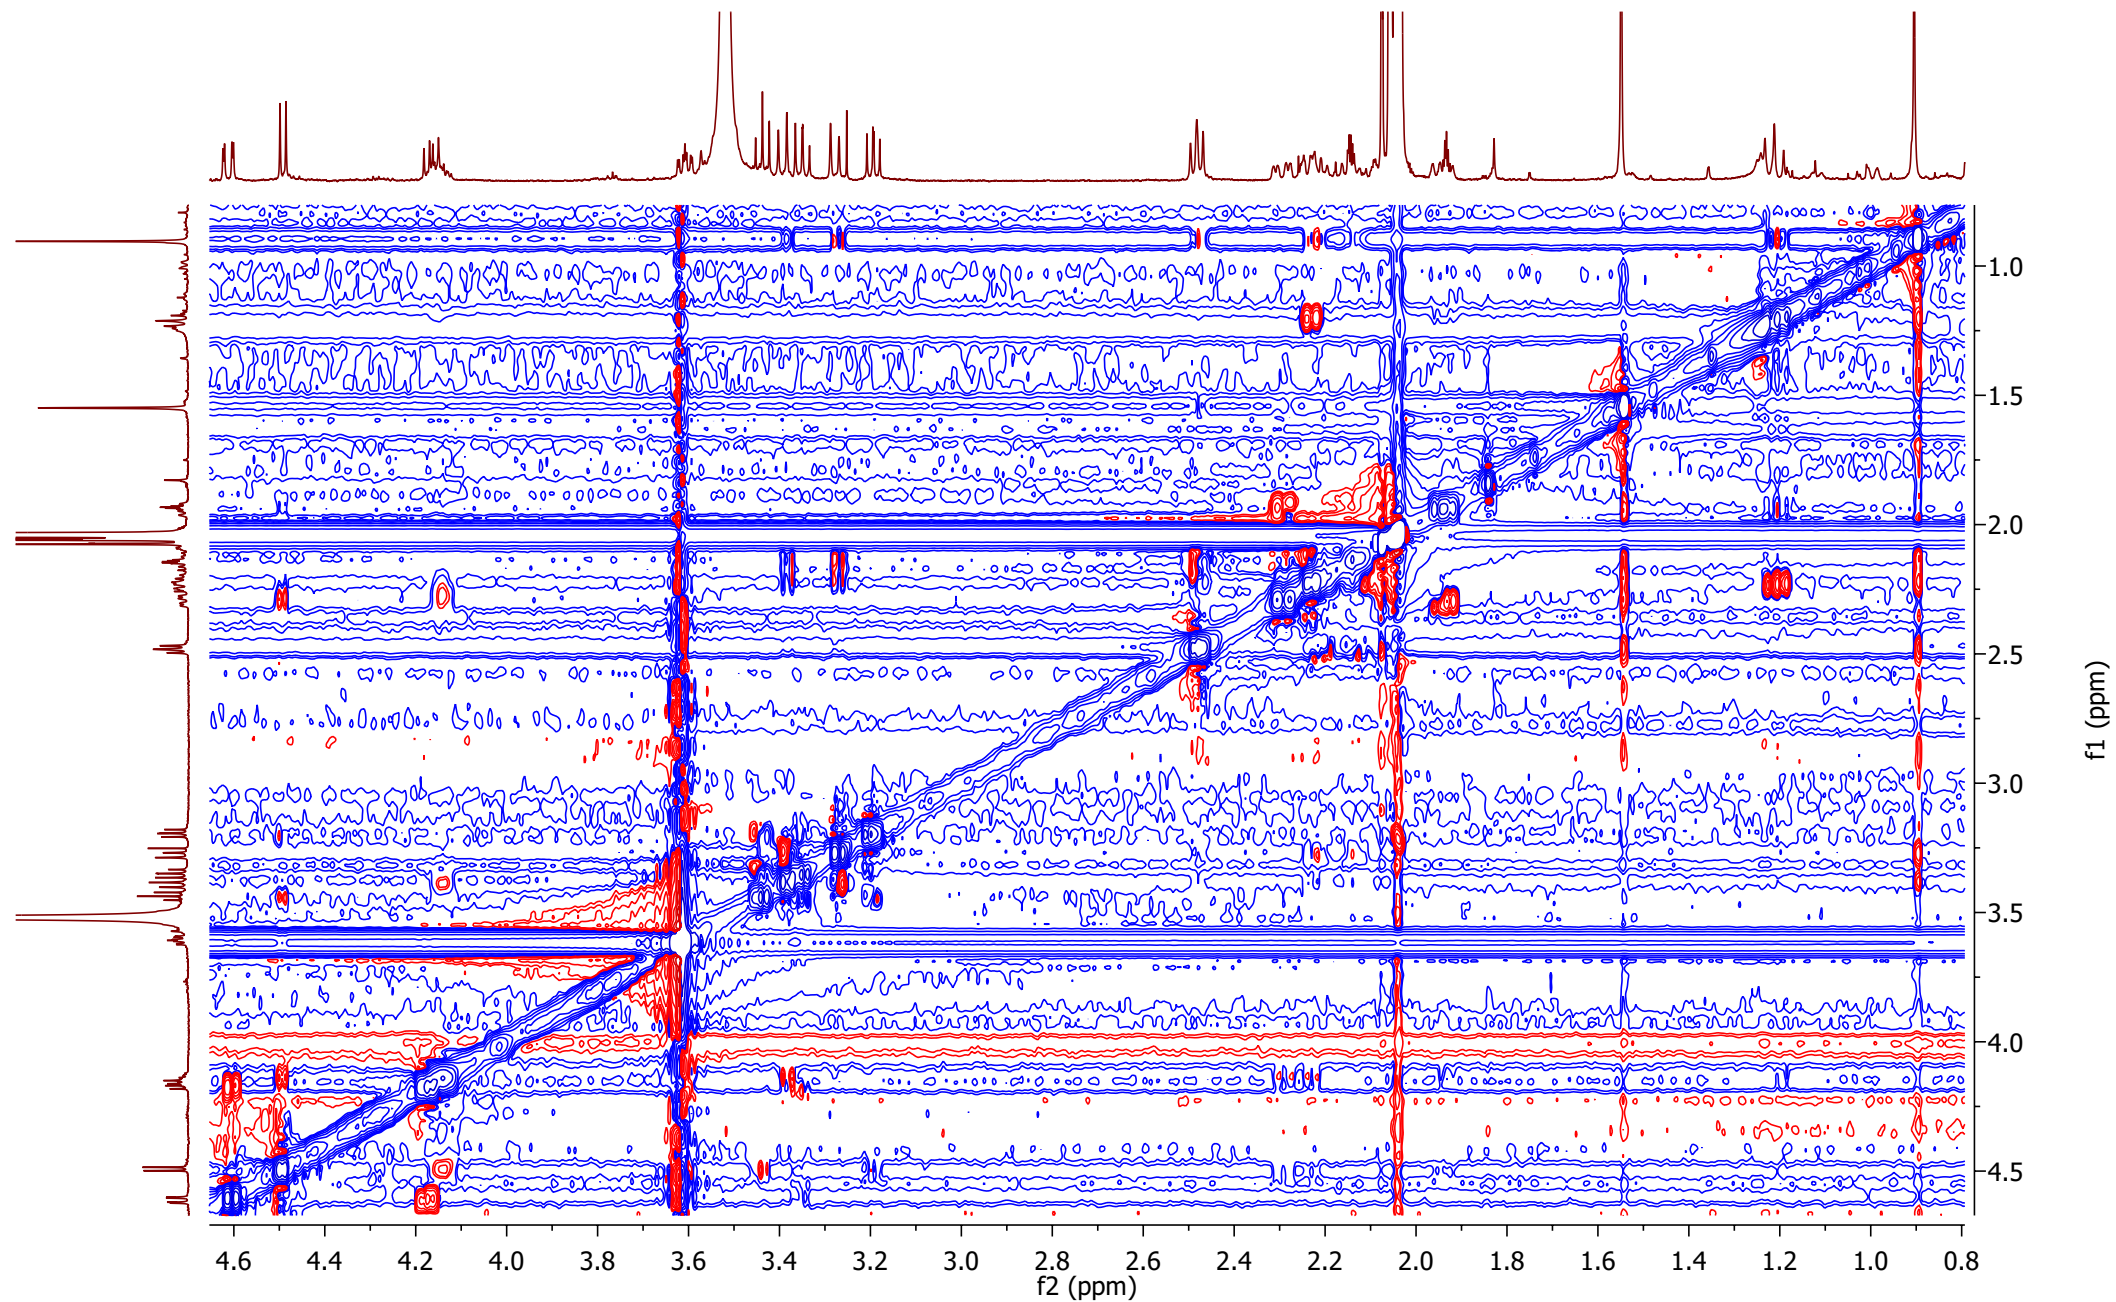

**Figure S15.** NOESY spectrum of compound **1** [600 MHz, acetone-*d*<sub>6</sub> + D<sub>2</sub>O (9+1)]

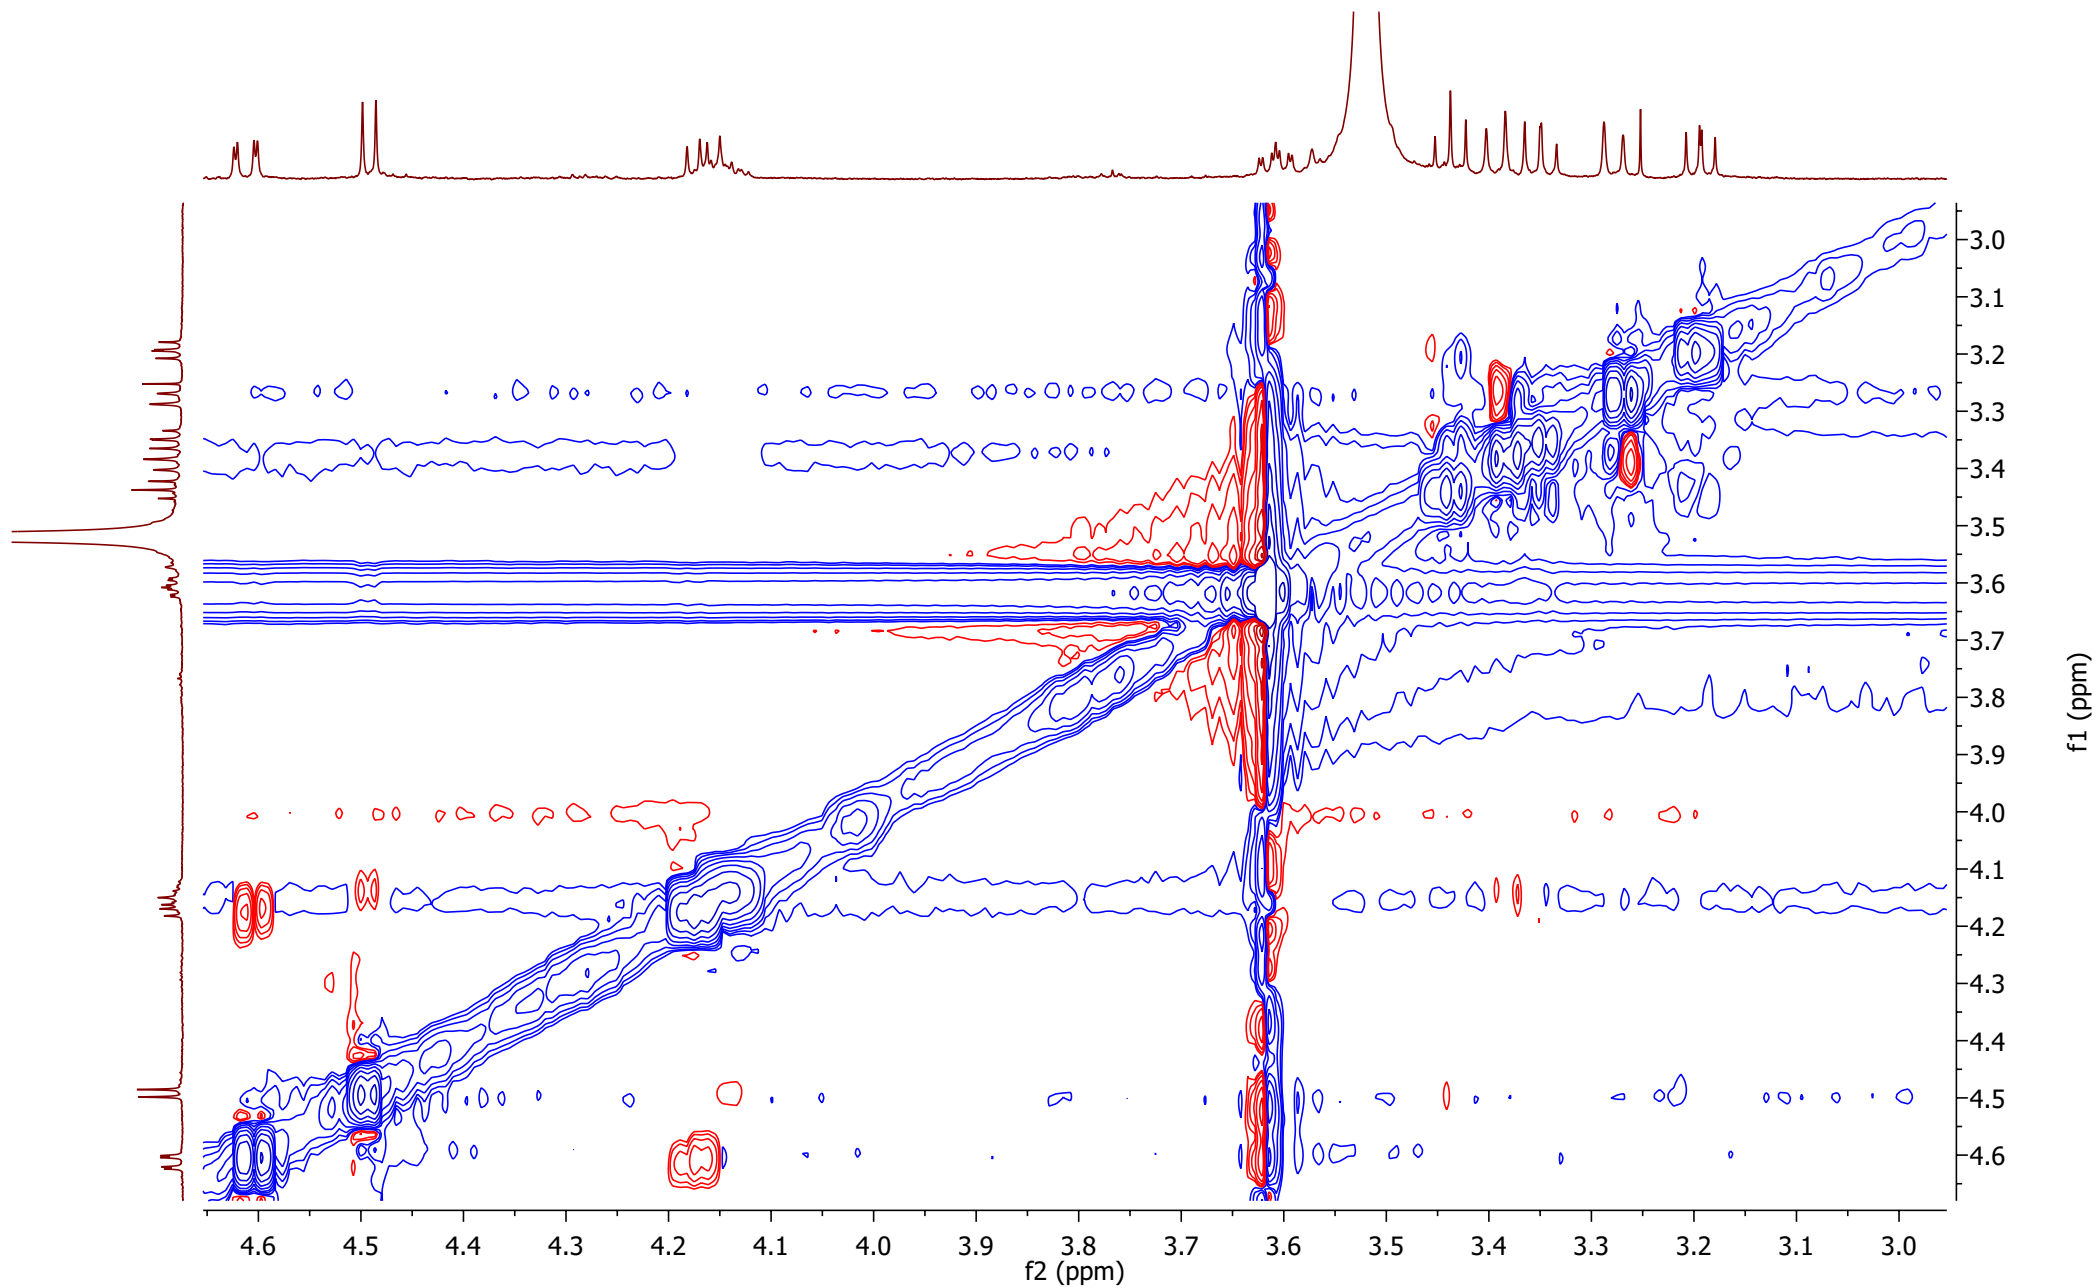

**Figure S16.** Expanded NOESY spectrum of compound **1** [600 MHz, acetone- $d_6$  +  $\text{D}_2\text{O}$  (9+1)]

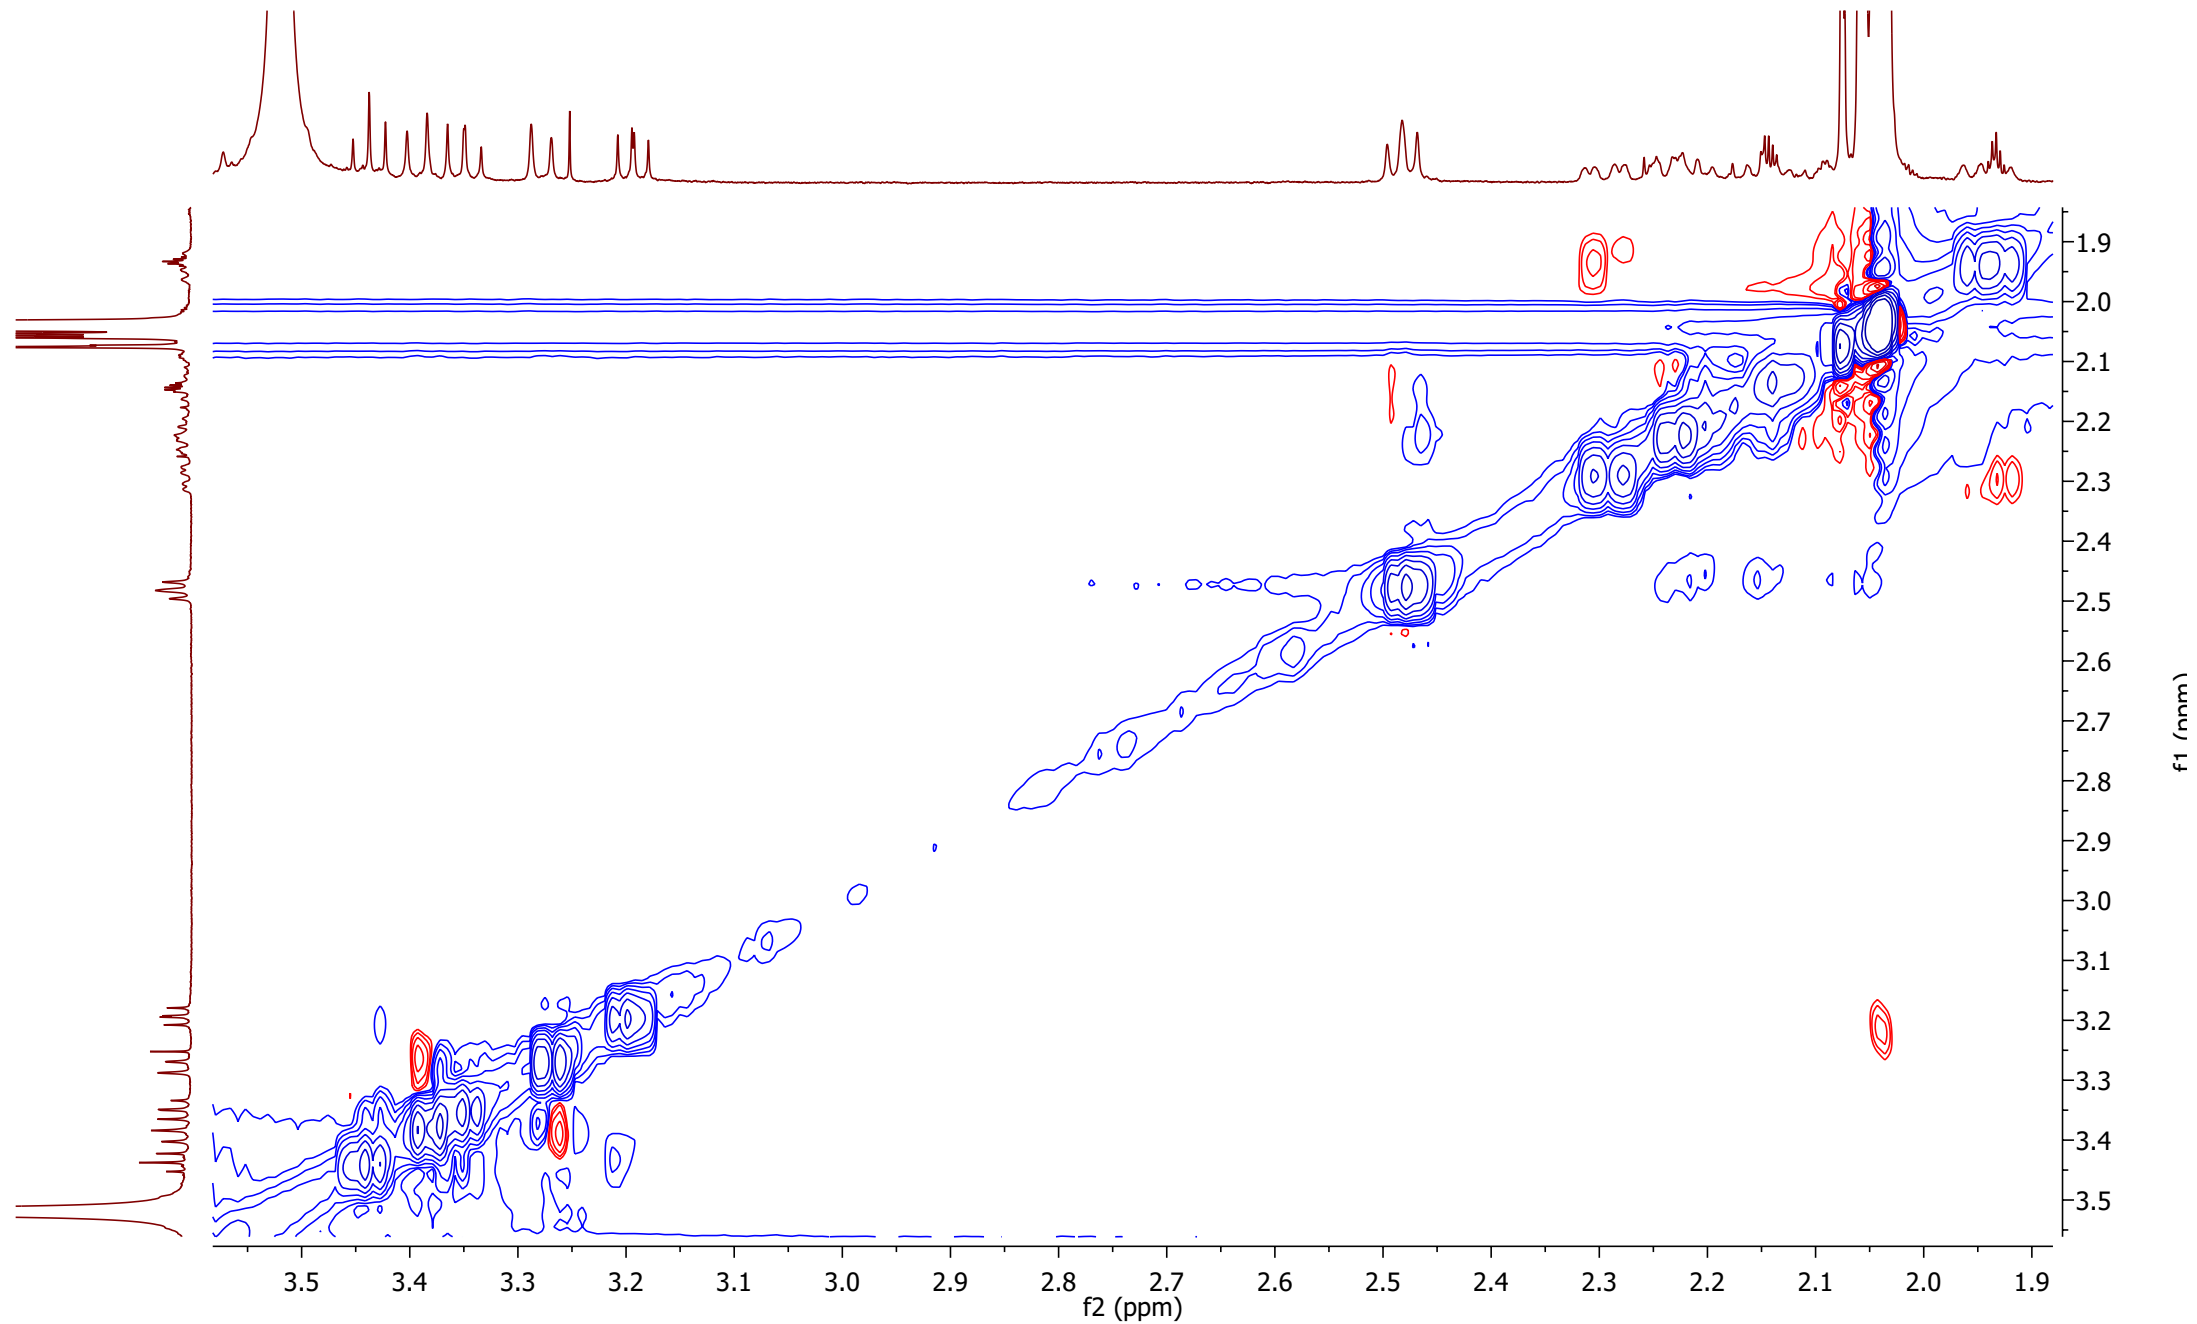

**Figure S17.** Expanded NOESY spectrum of compound **1** [600 MHz, acetone- $d_6$  + D $_2$ O (9+1)]



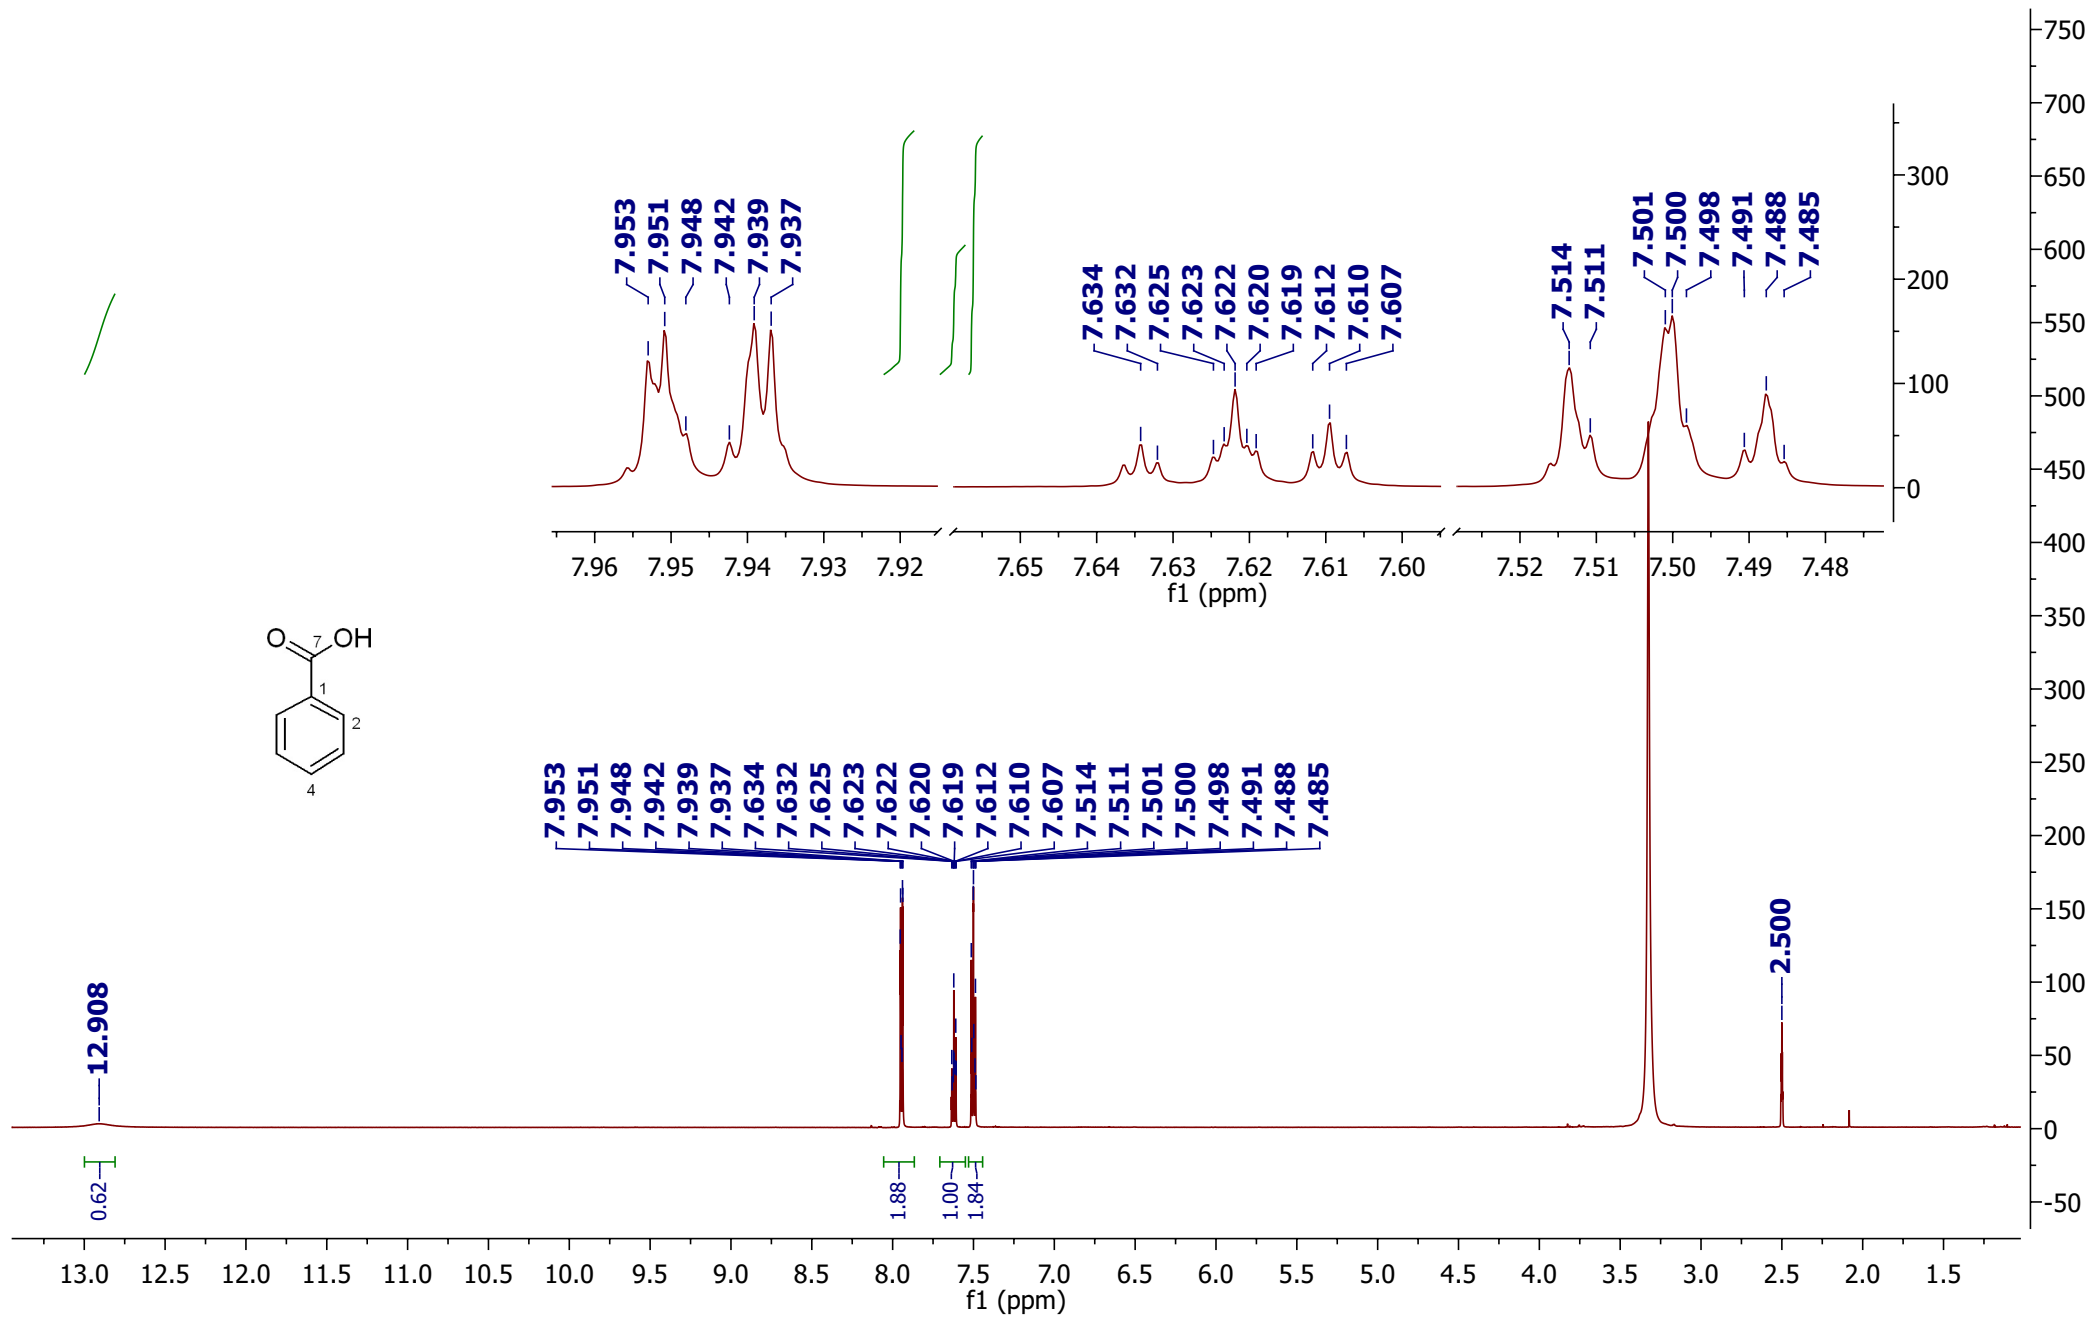

**Figure S18.** <sup>1</sup>H NMR spectrum of compound **2** (600 MHz, DMSO-*d*<sub>6</sub>)

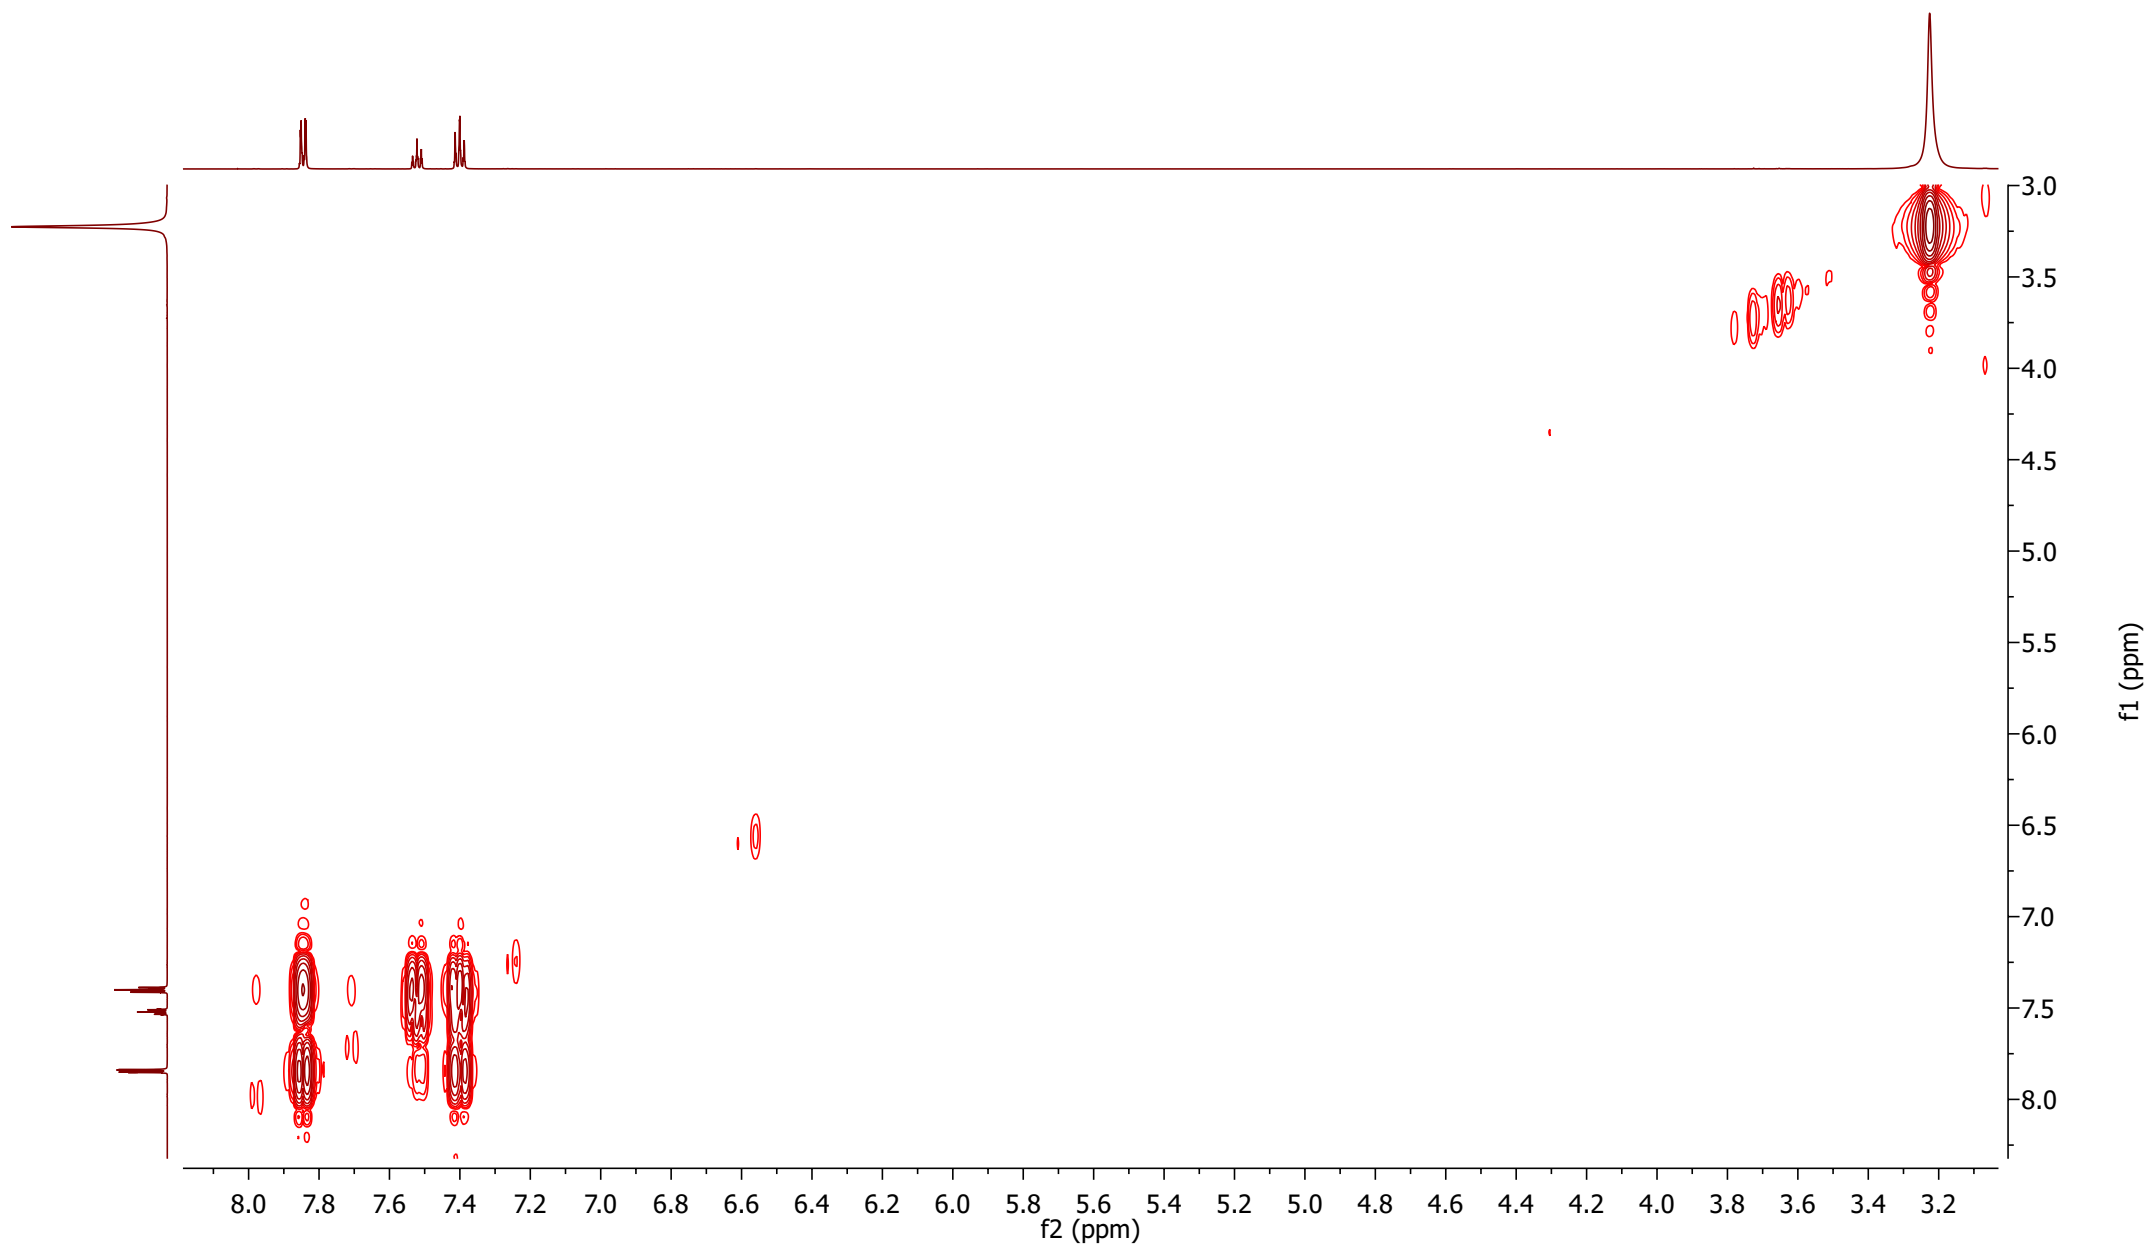

**Figure S19.**  $^1\text{H}$ - $^1\text{H}$  COSY spectrum of compound **2** (600 MHz, DMSO- $d_6$ )

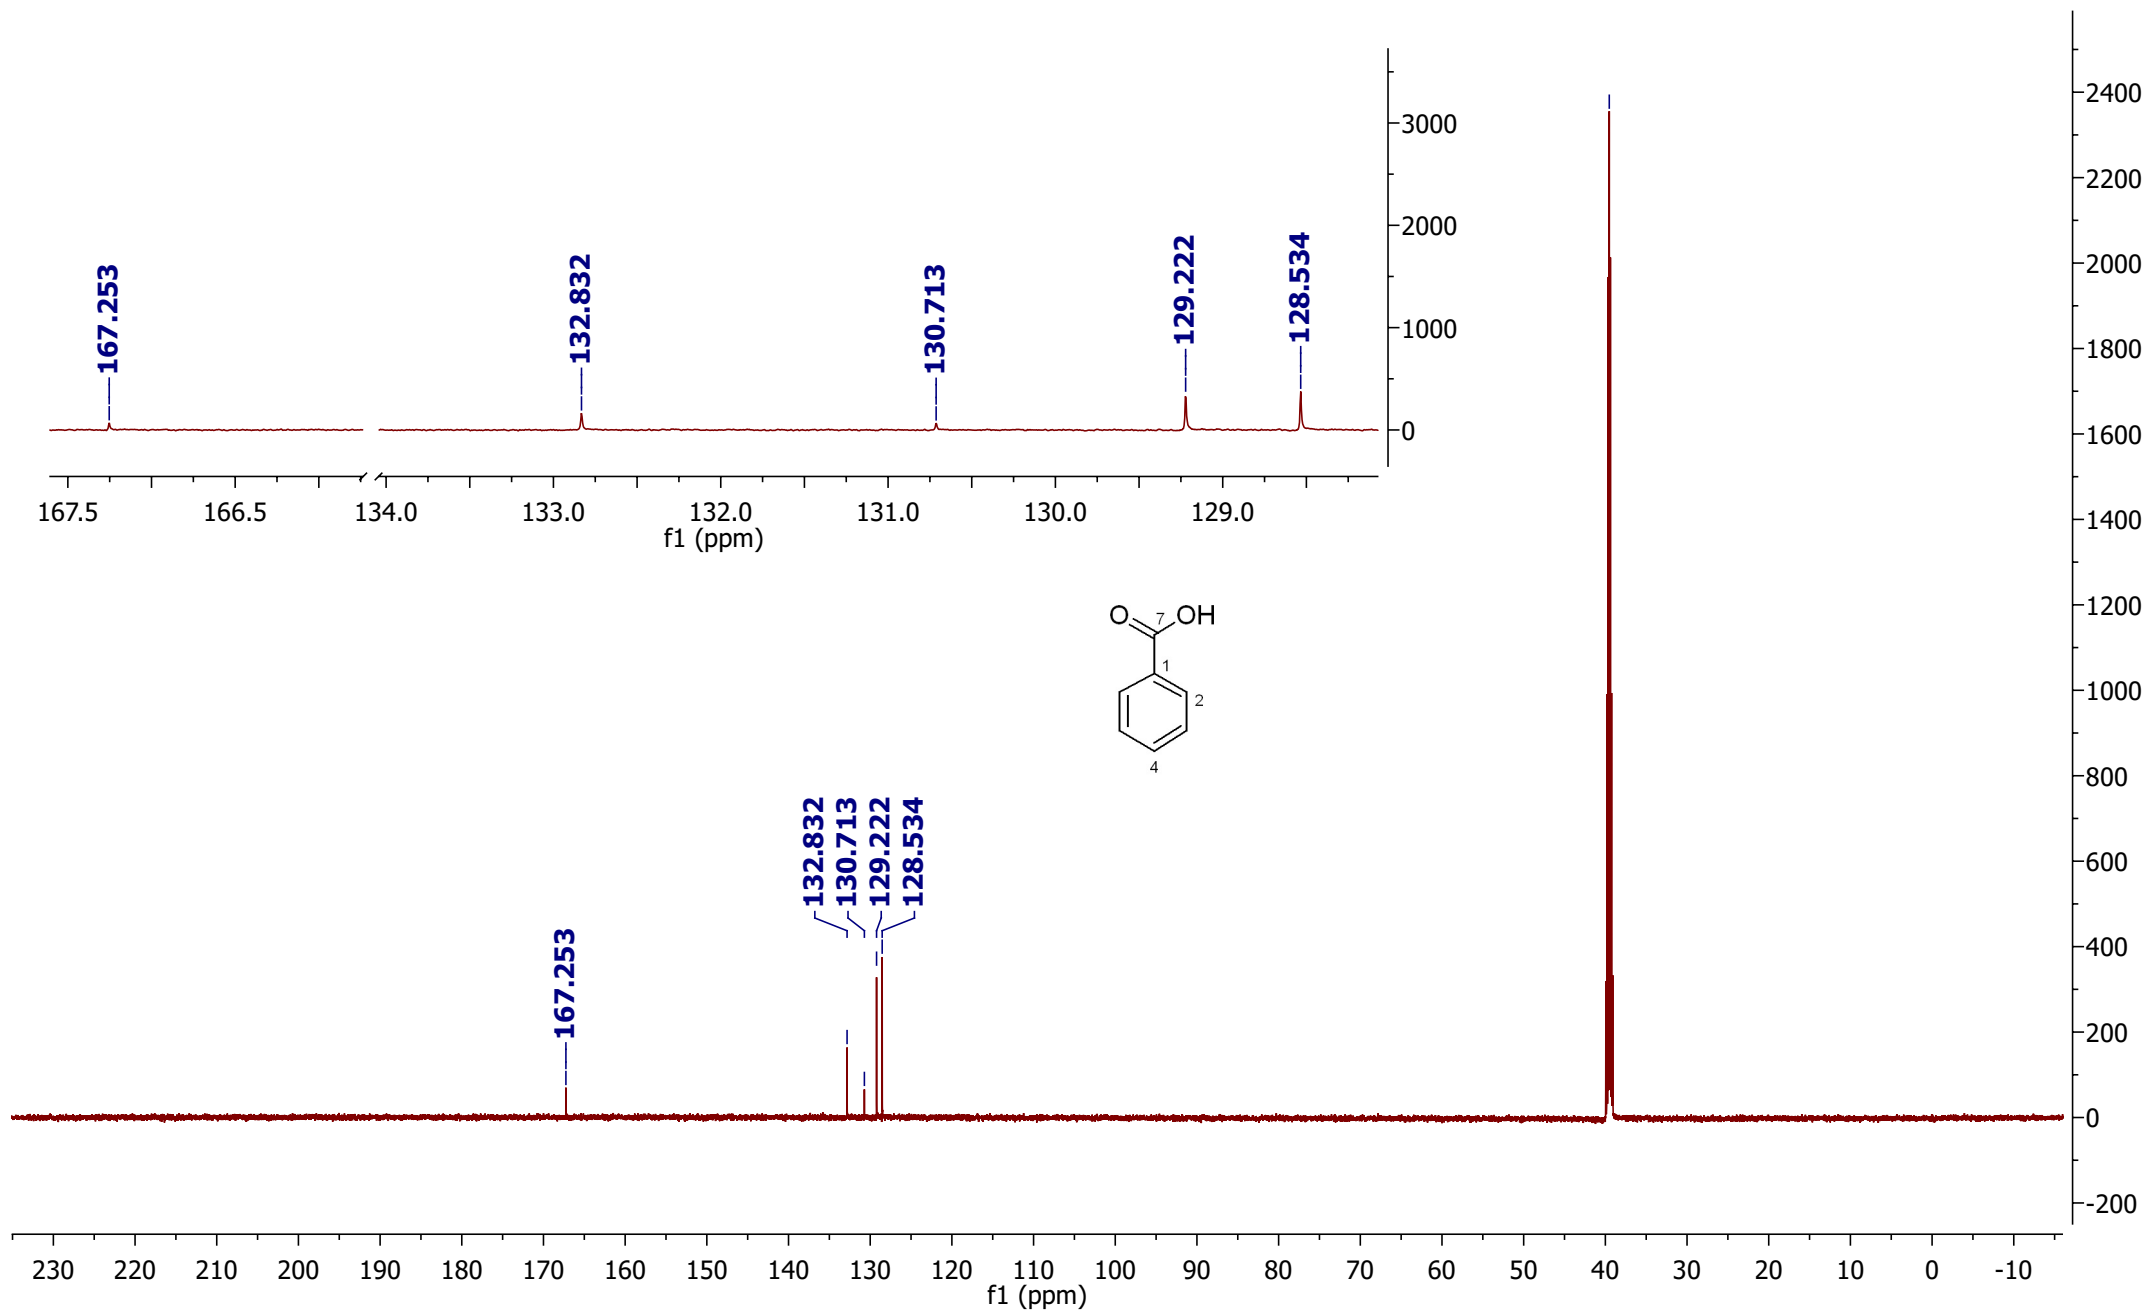

**Figure S20.**  $^{13}\text{C}$  NMR spectrum of compound **2** (151 MHz,  $\text{DMSO}-d_6$ )

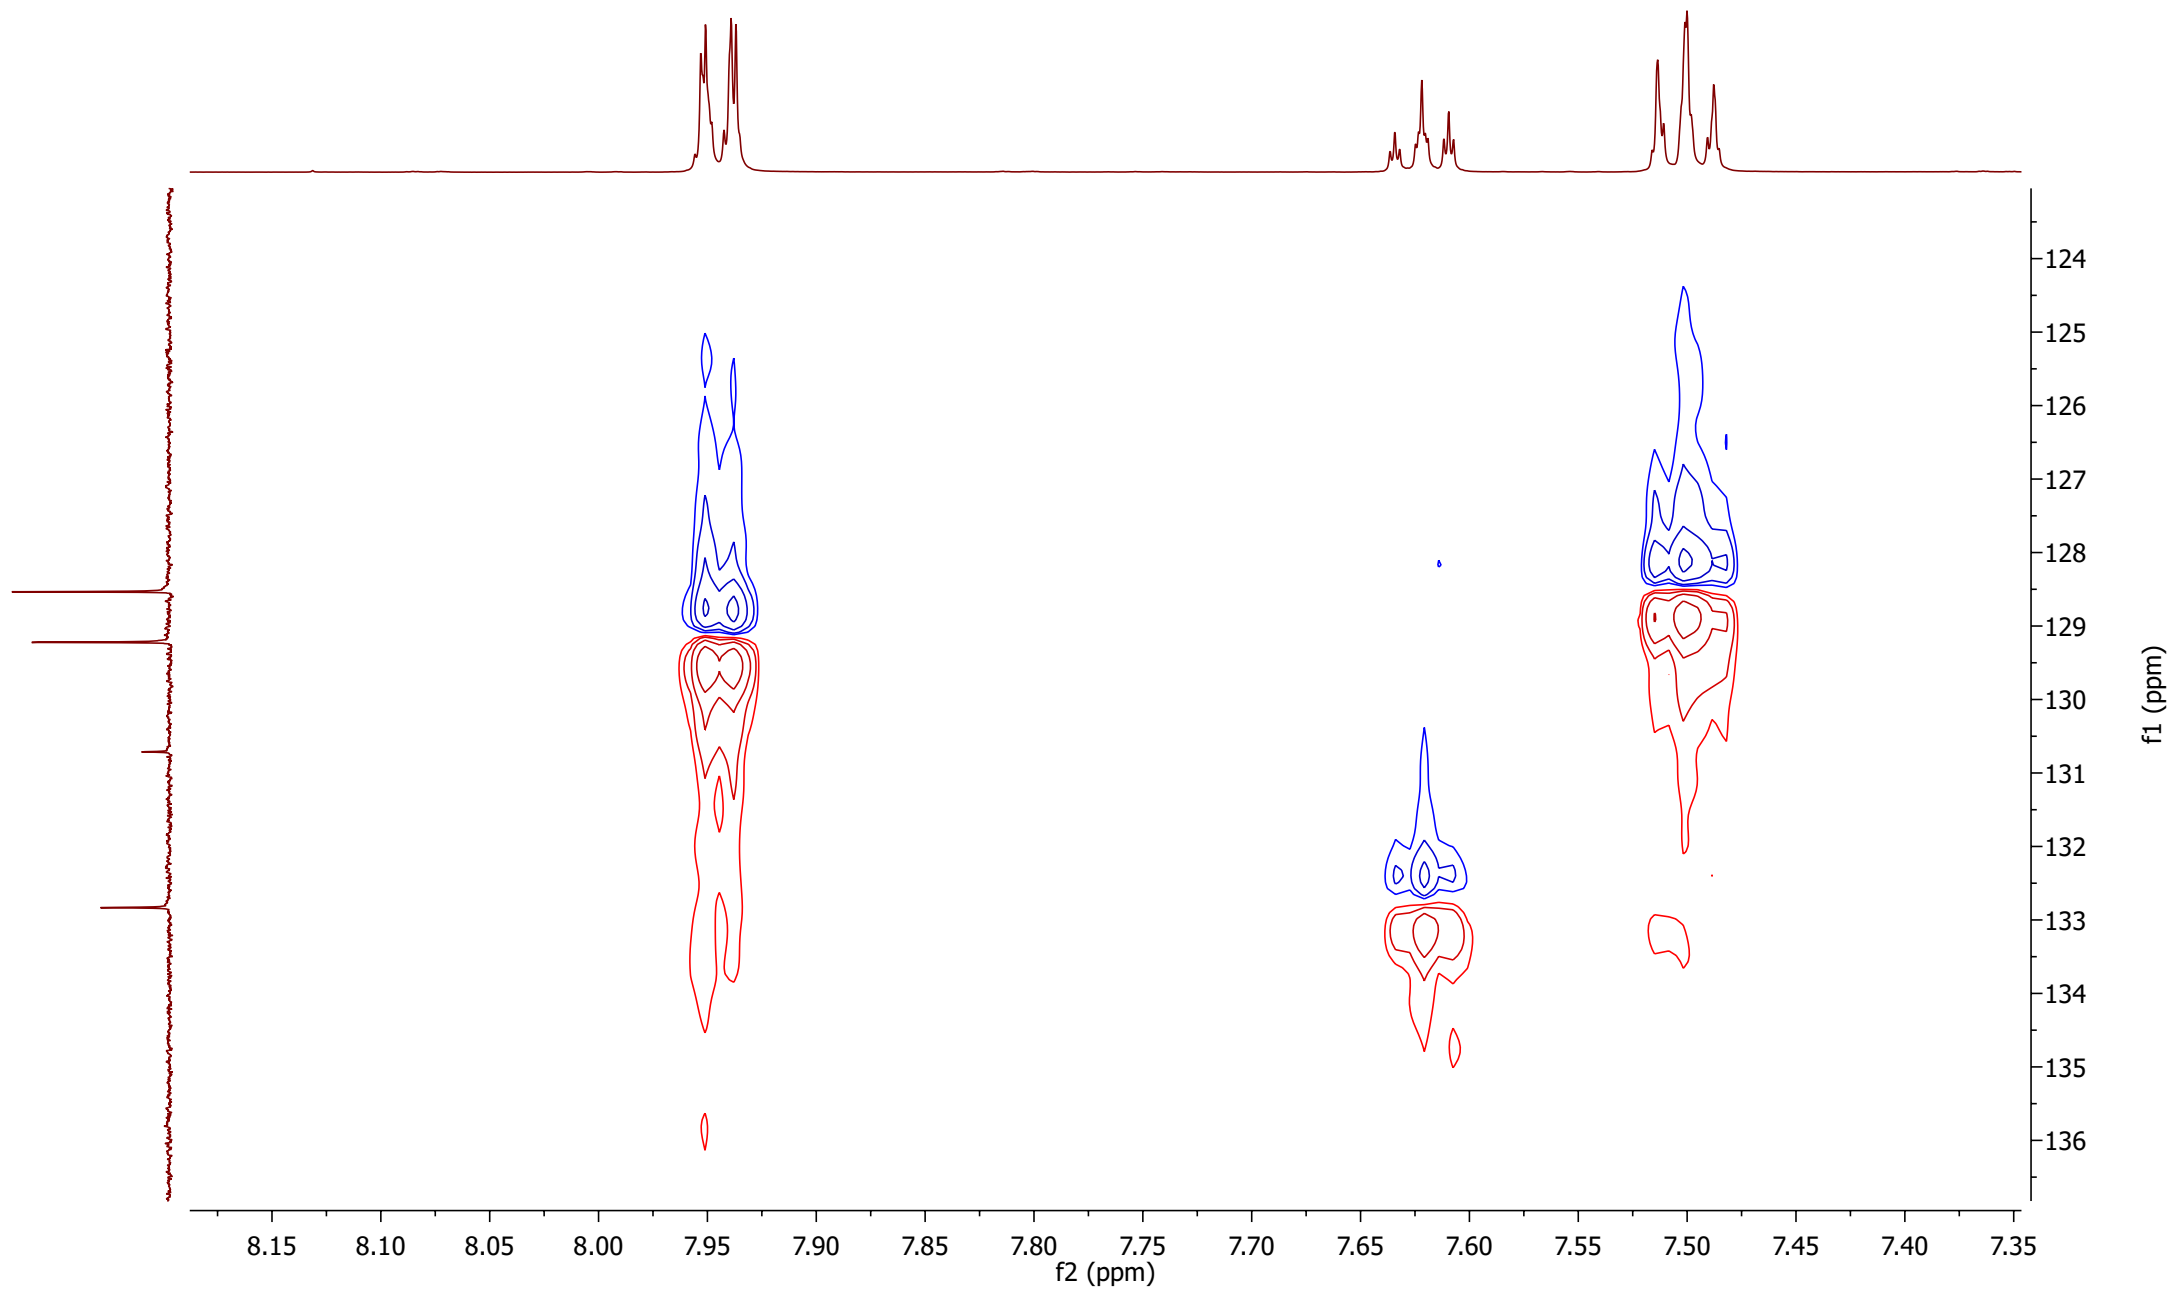

**Figure S21.** HSQC spectrum of compound **2** (600 MHz, DMSO- $d_6$ )

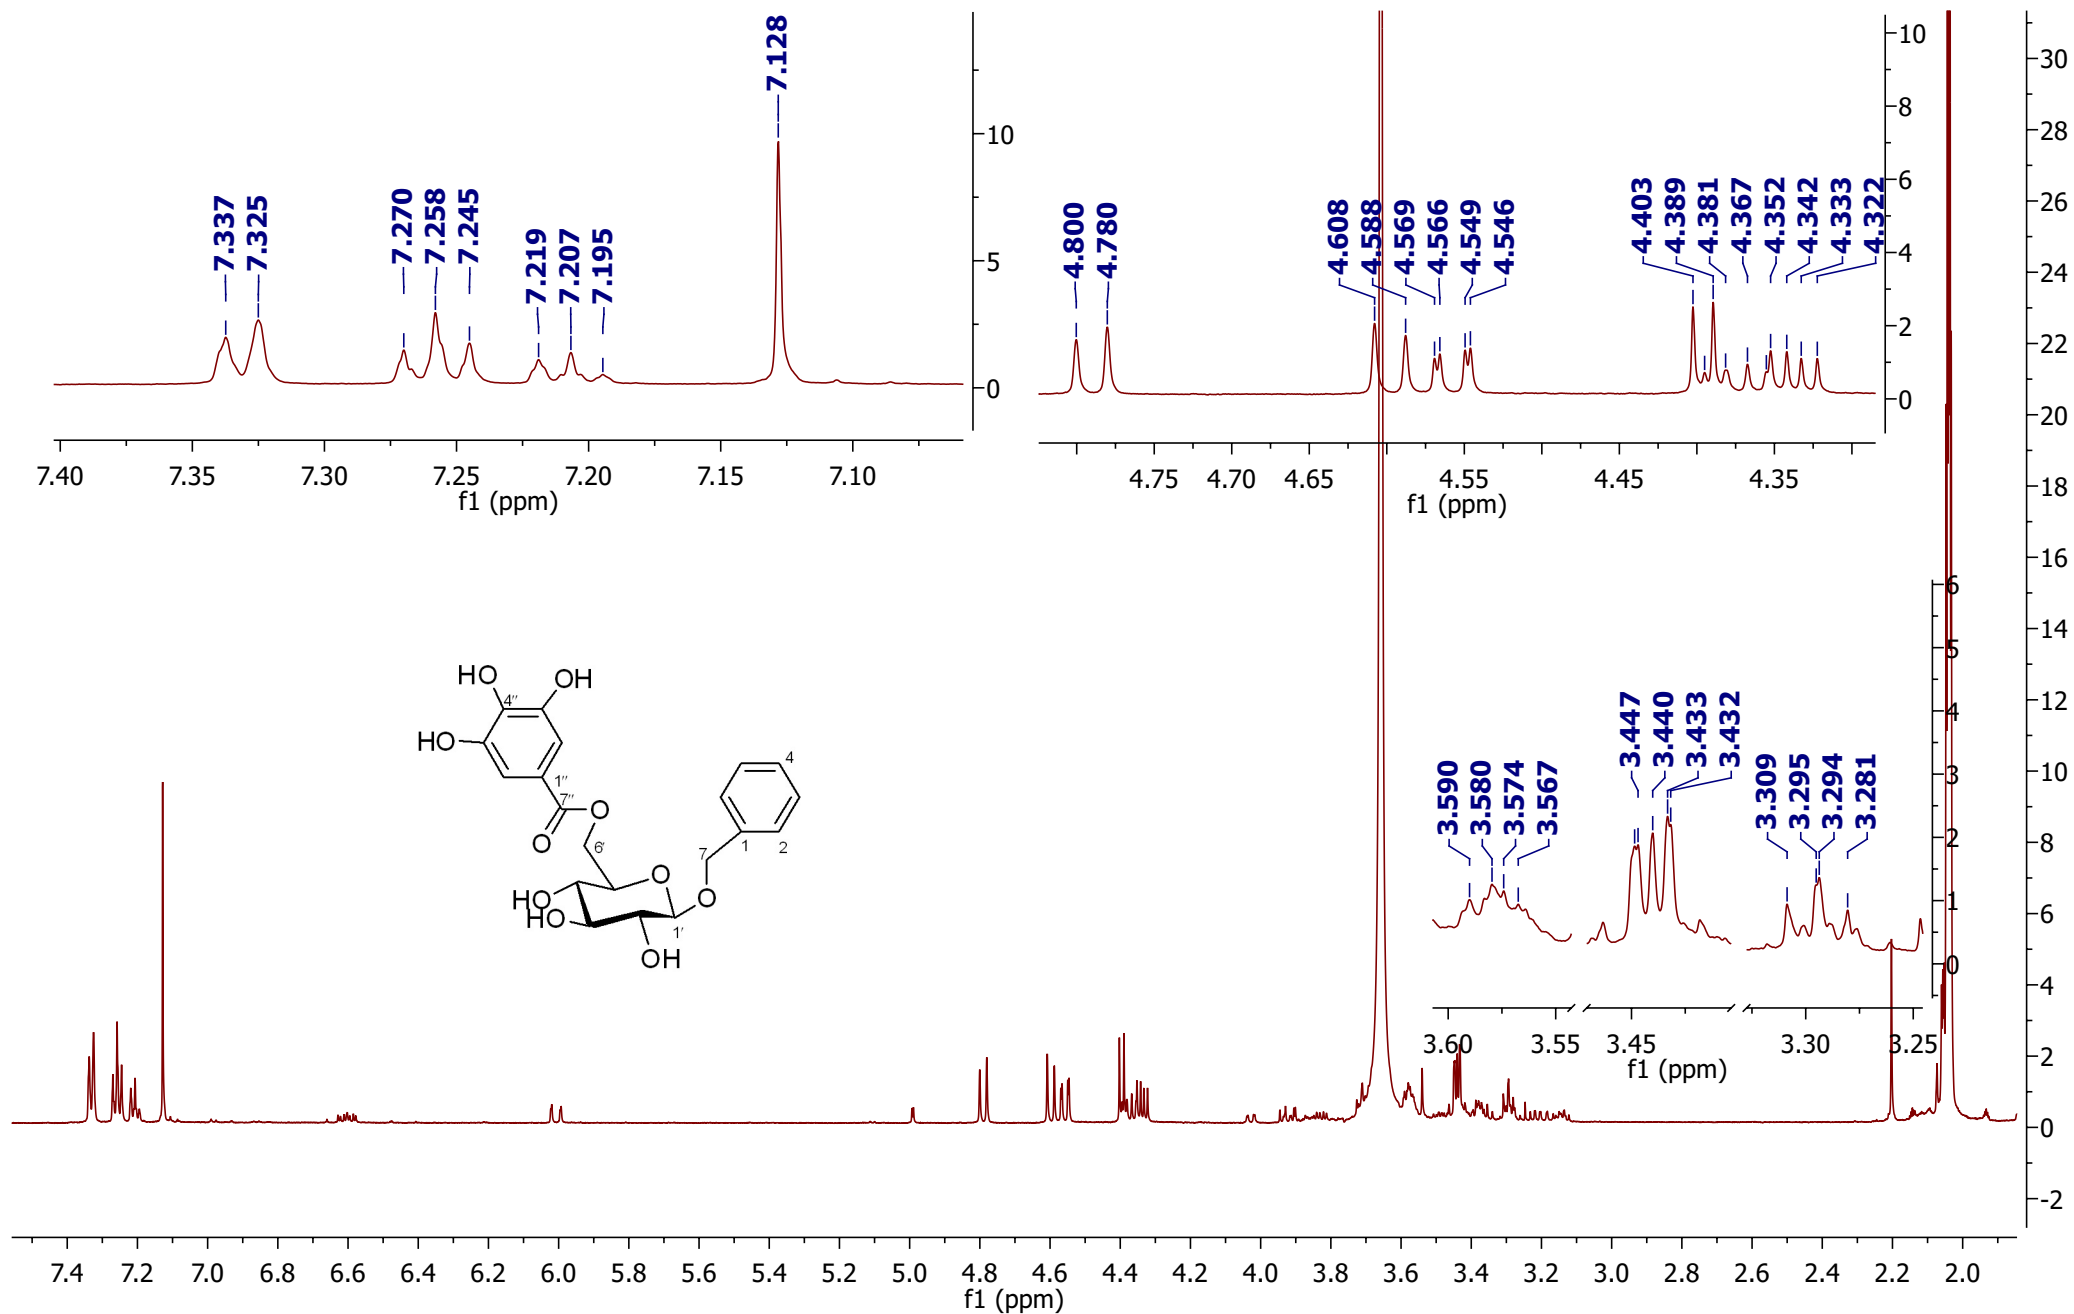

**Figure S22.**  $^1\text{H}$  NMR spectrum of compound **3** [600 MHz, acetone- $d_6$  +  $\text{D}_2\text{O}$  (9+1)]

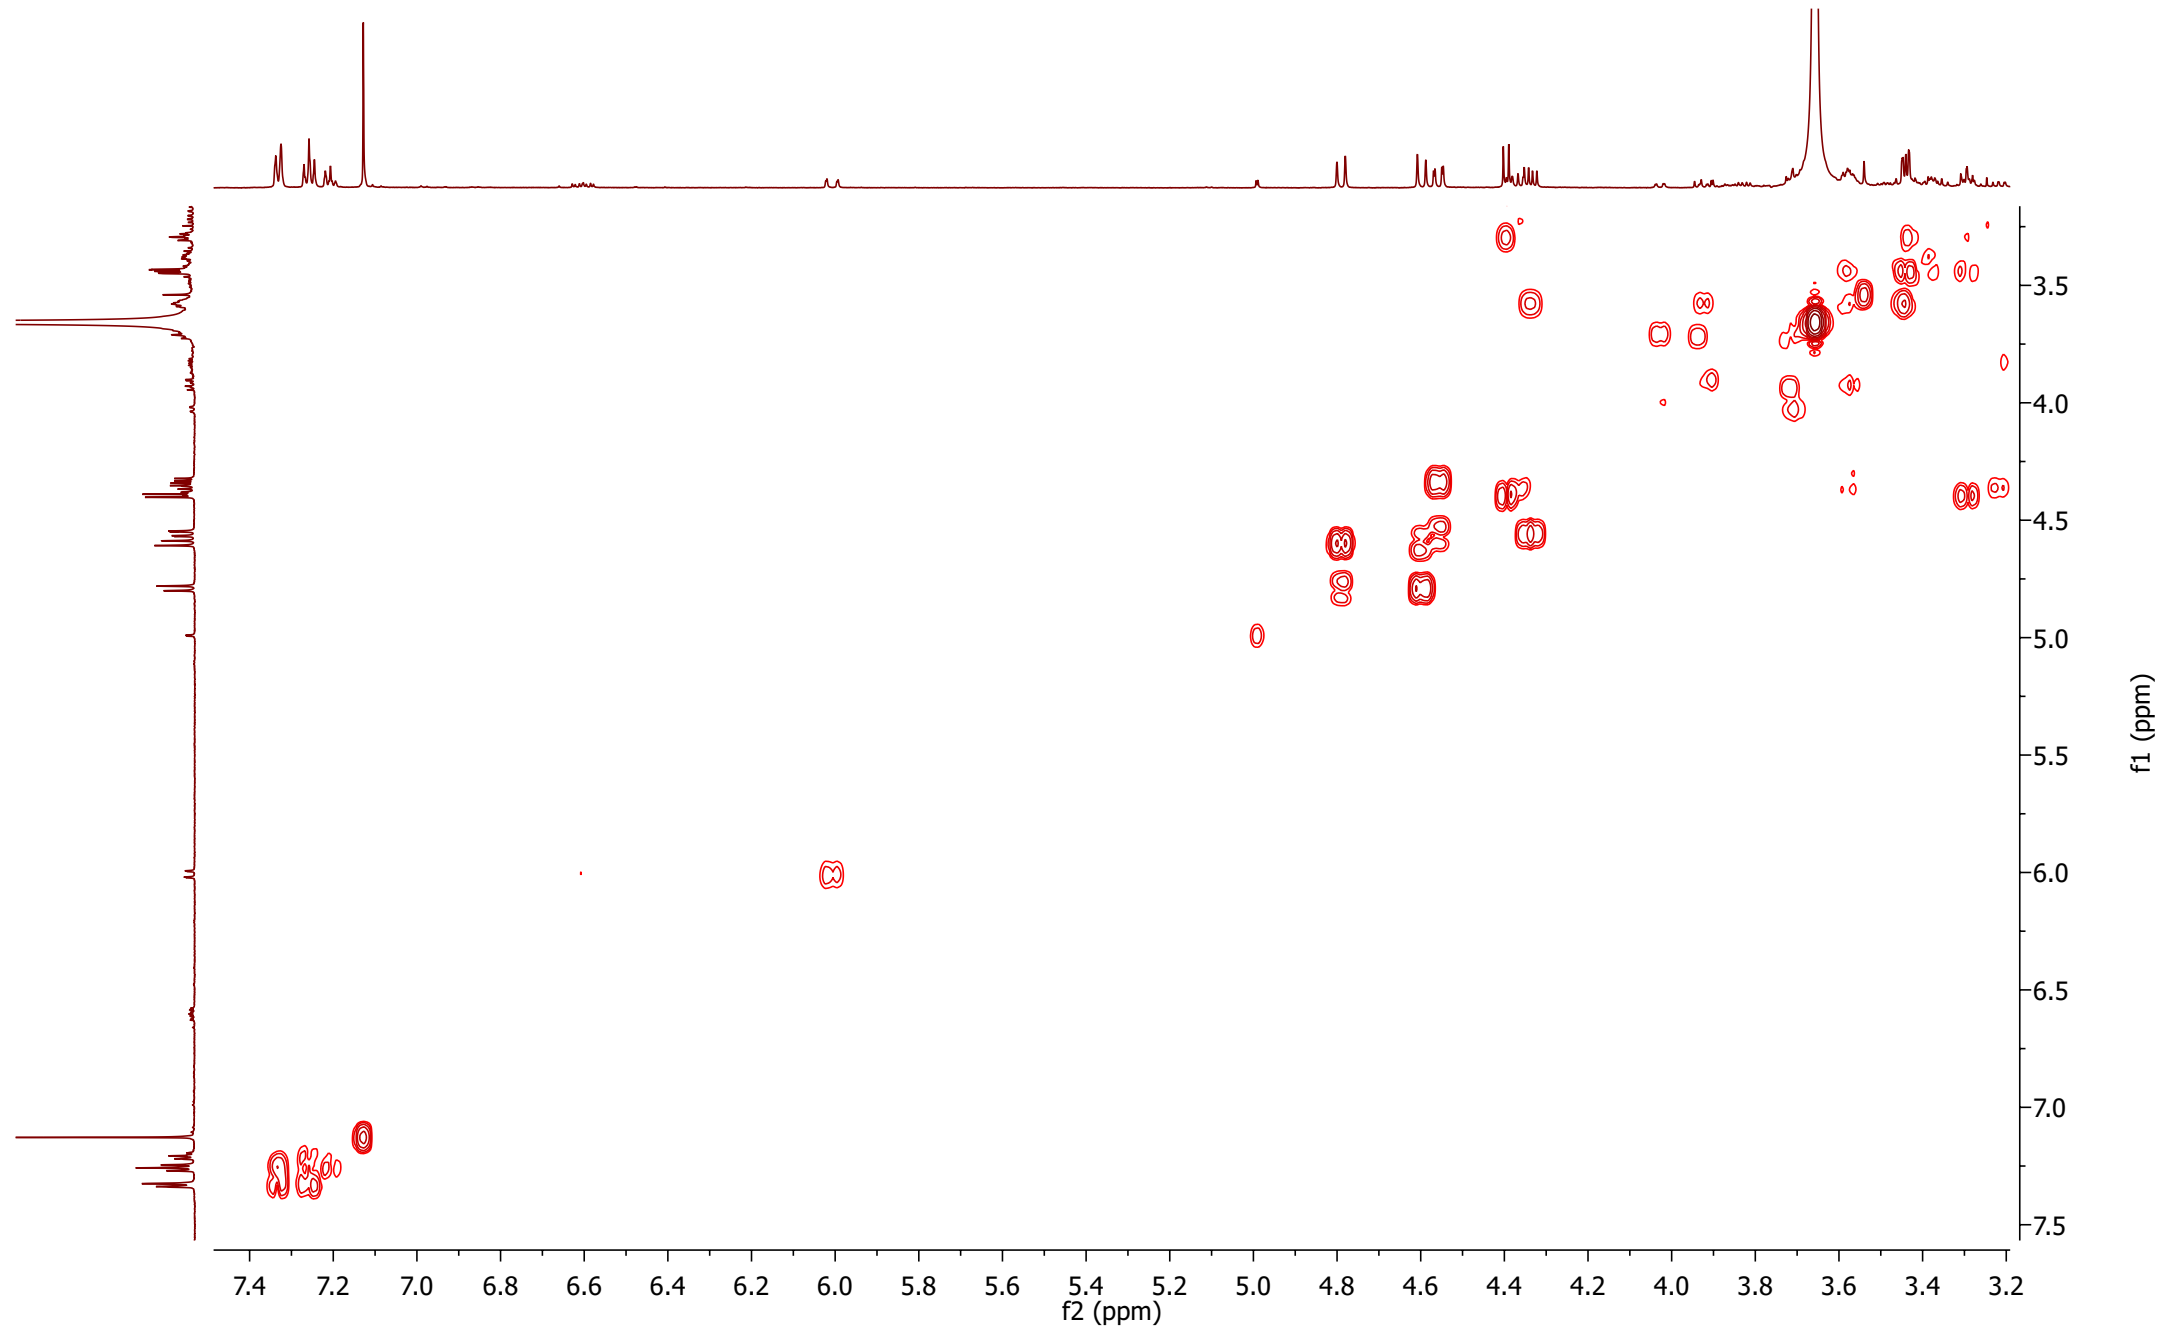

**Figure S23.**  $^1\text{H}$ - $^1\text{H}$  COSY spectrum of compound **3** [600 MHz, acetone- $d_6$  +  $\text{D}_2\text{O}$  (9+1)]

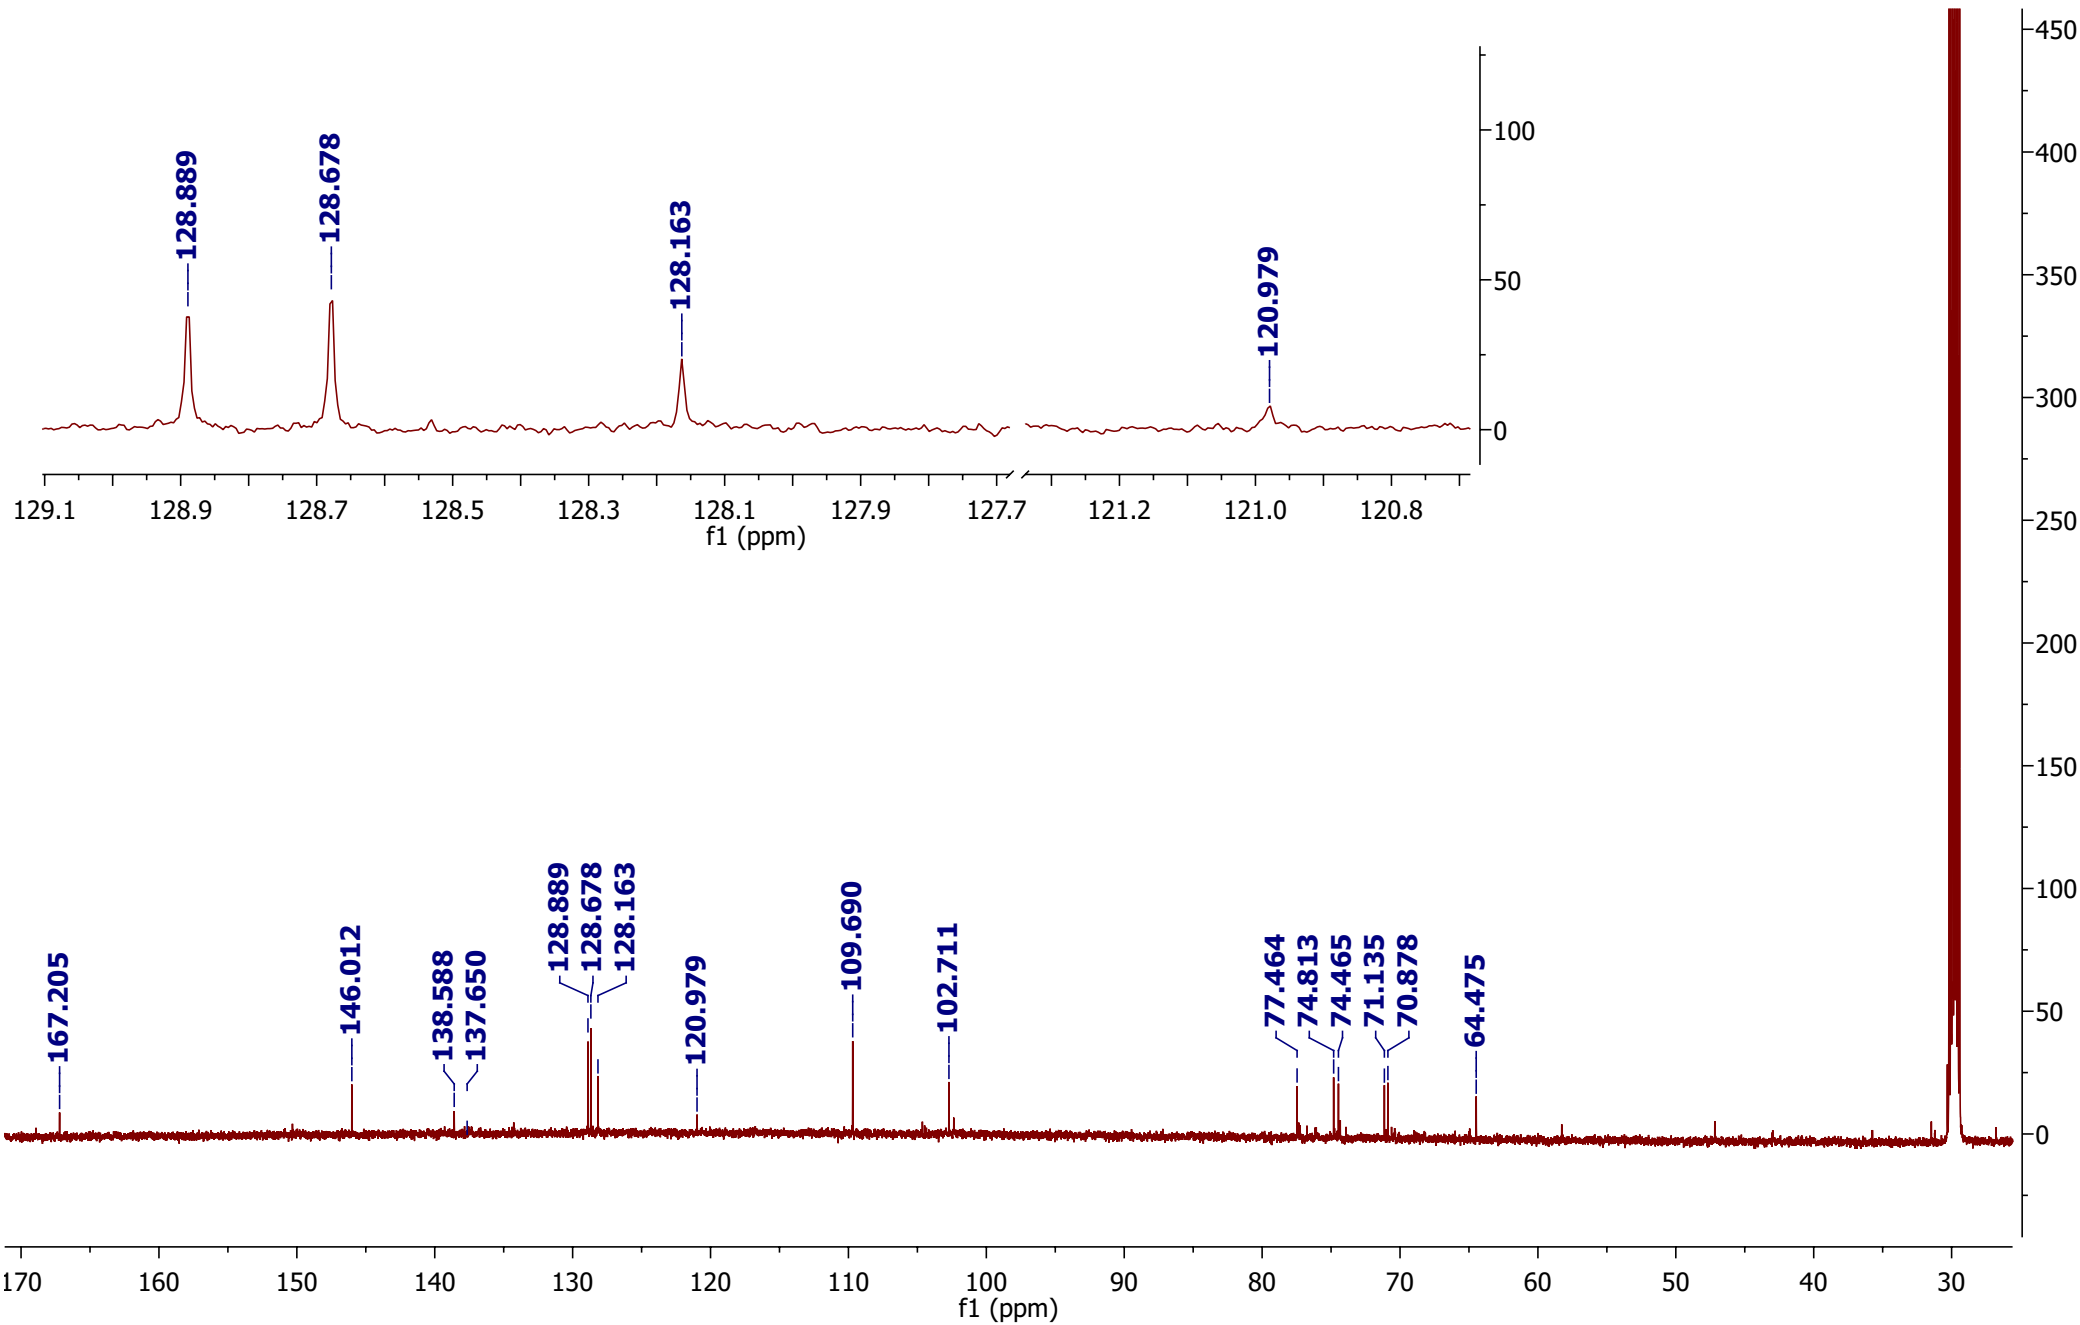

**Figure S24.**  $^{13}\text{C}$  NMR spectrum of compound **31** [151 MHz, acetone- $d_6$  +  $\text{D}_2\text{O}$  (9+1)]

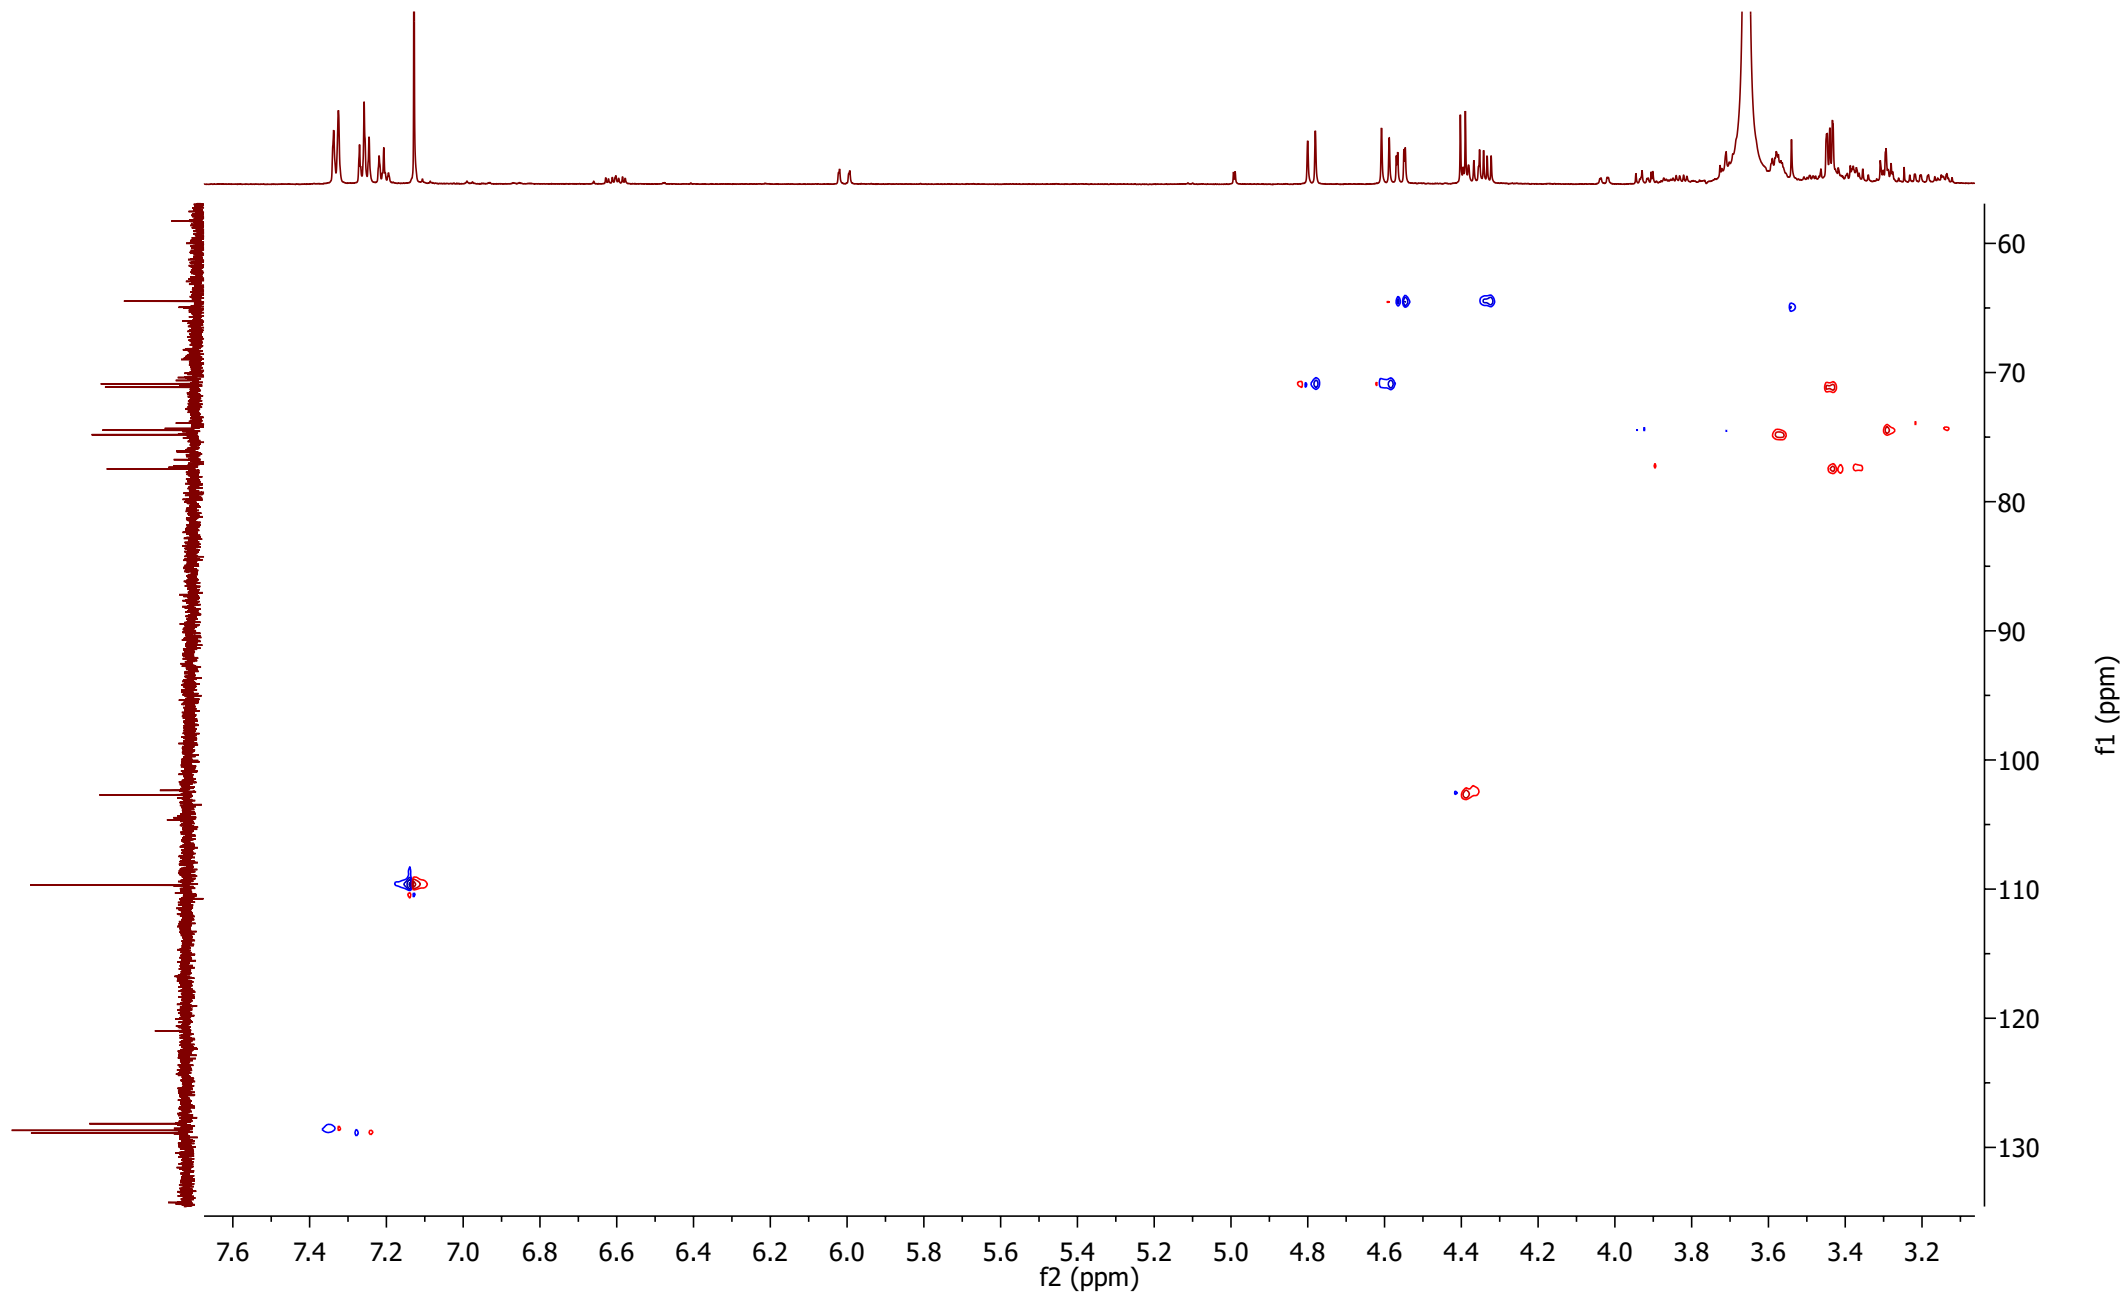

**Figure S25.** HSQC spectrum of compound **3** [600 MHz, acetone- $d_6$  + D $_2$ O (9+1)]



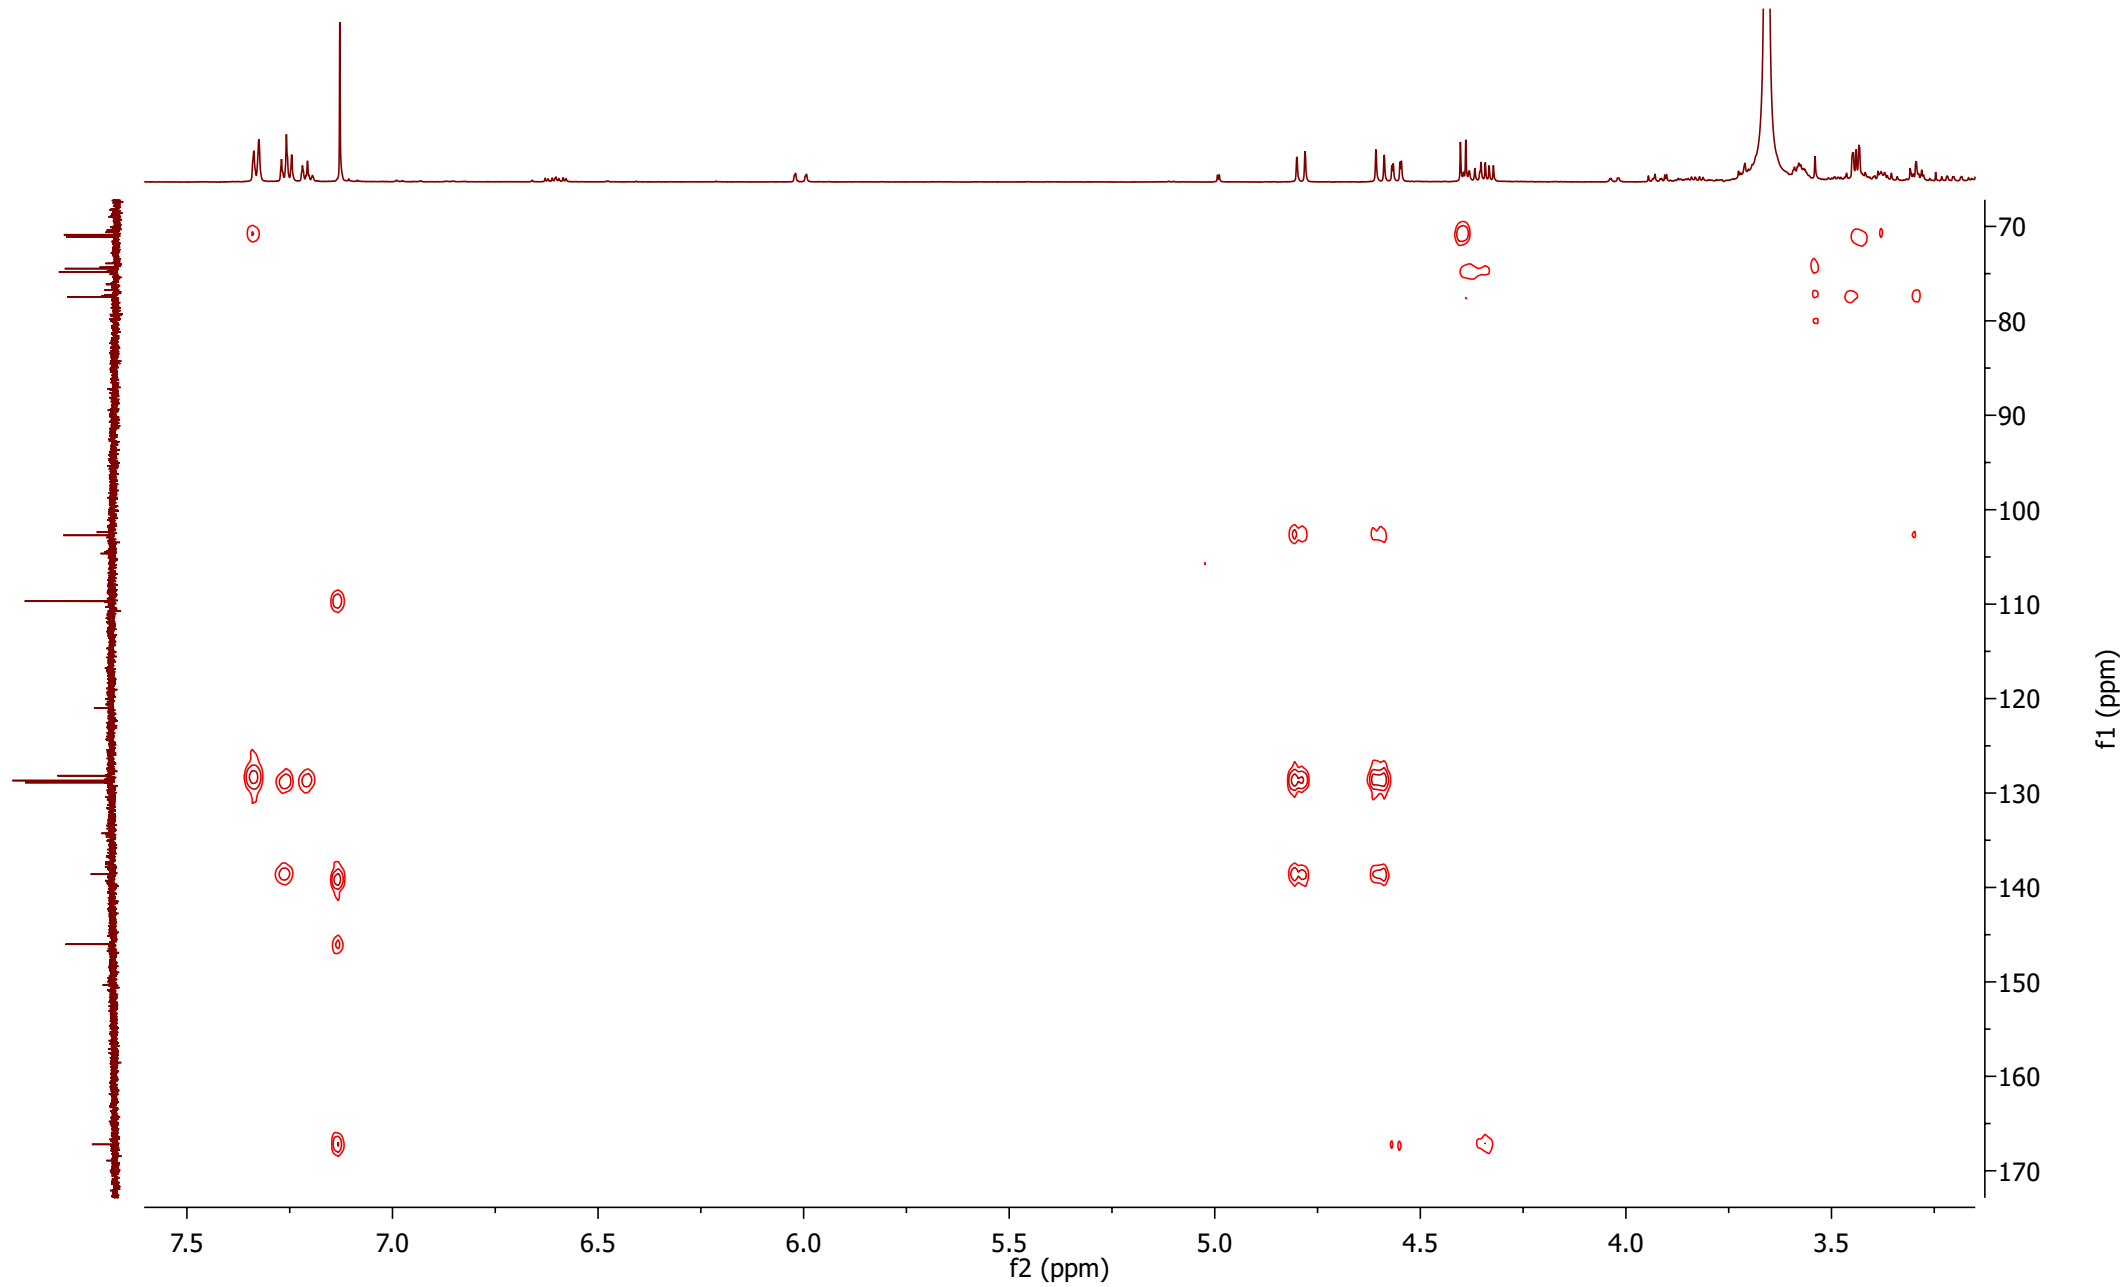

**Figure S26.** HMBC spectrum of compound **3** [600 MHz, acetone- $d_6$  +  $\text{D}_2\text{O}$  (9+1)]



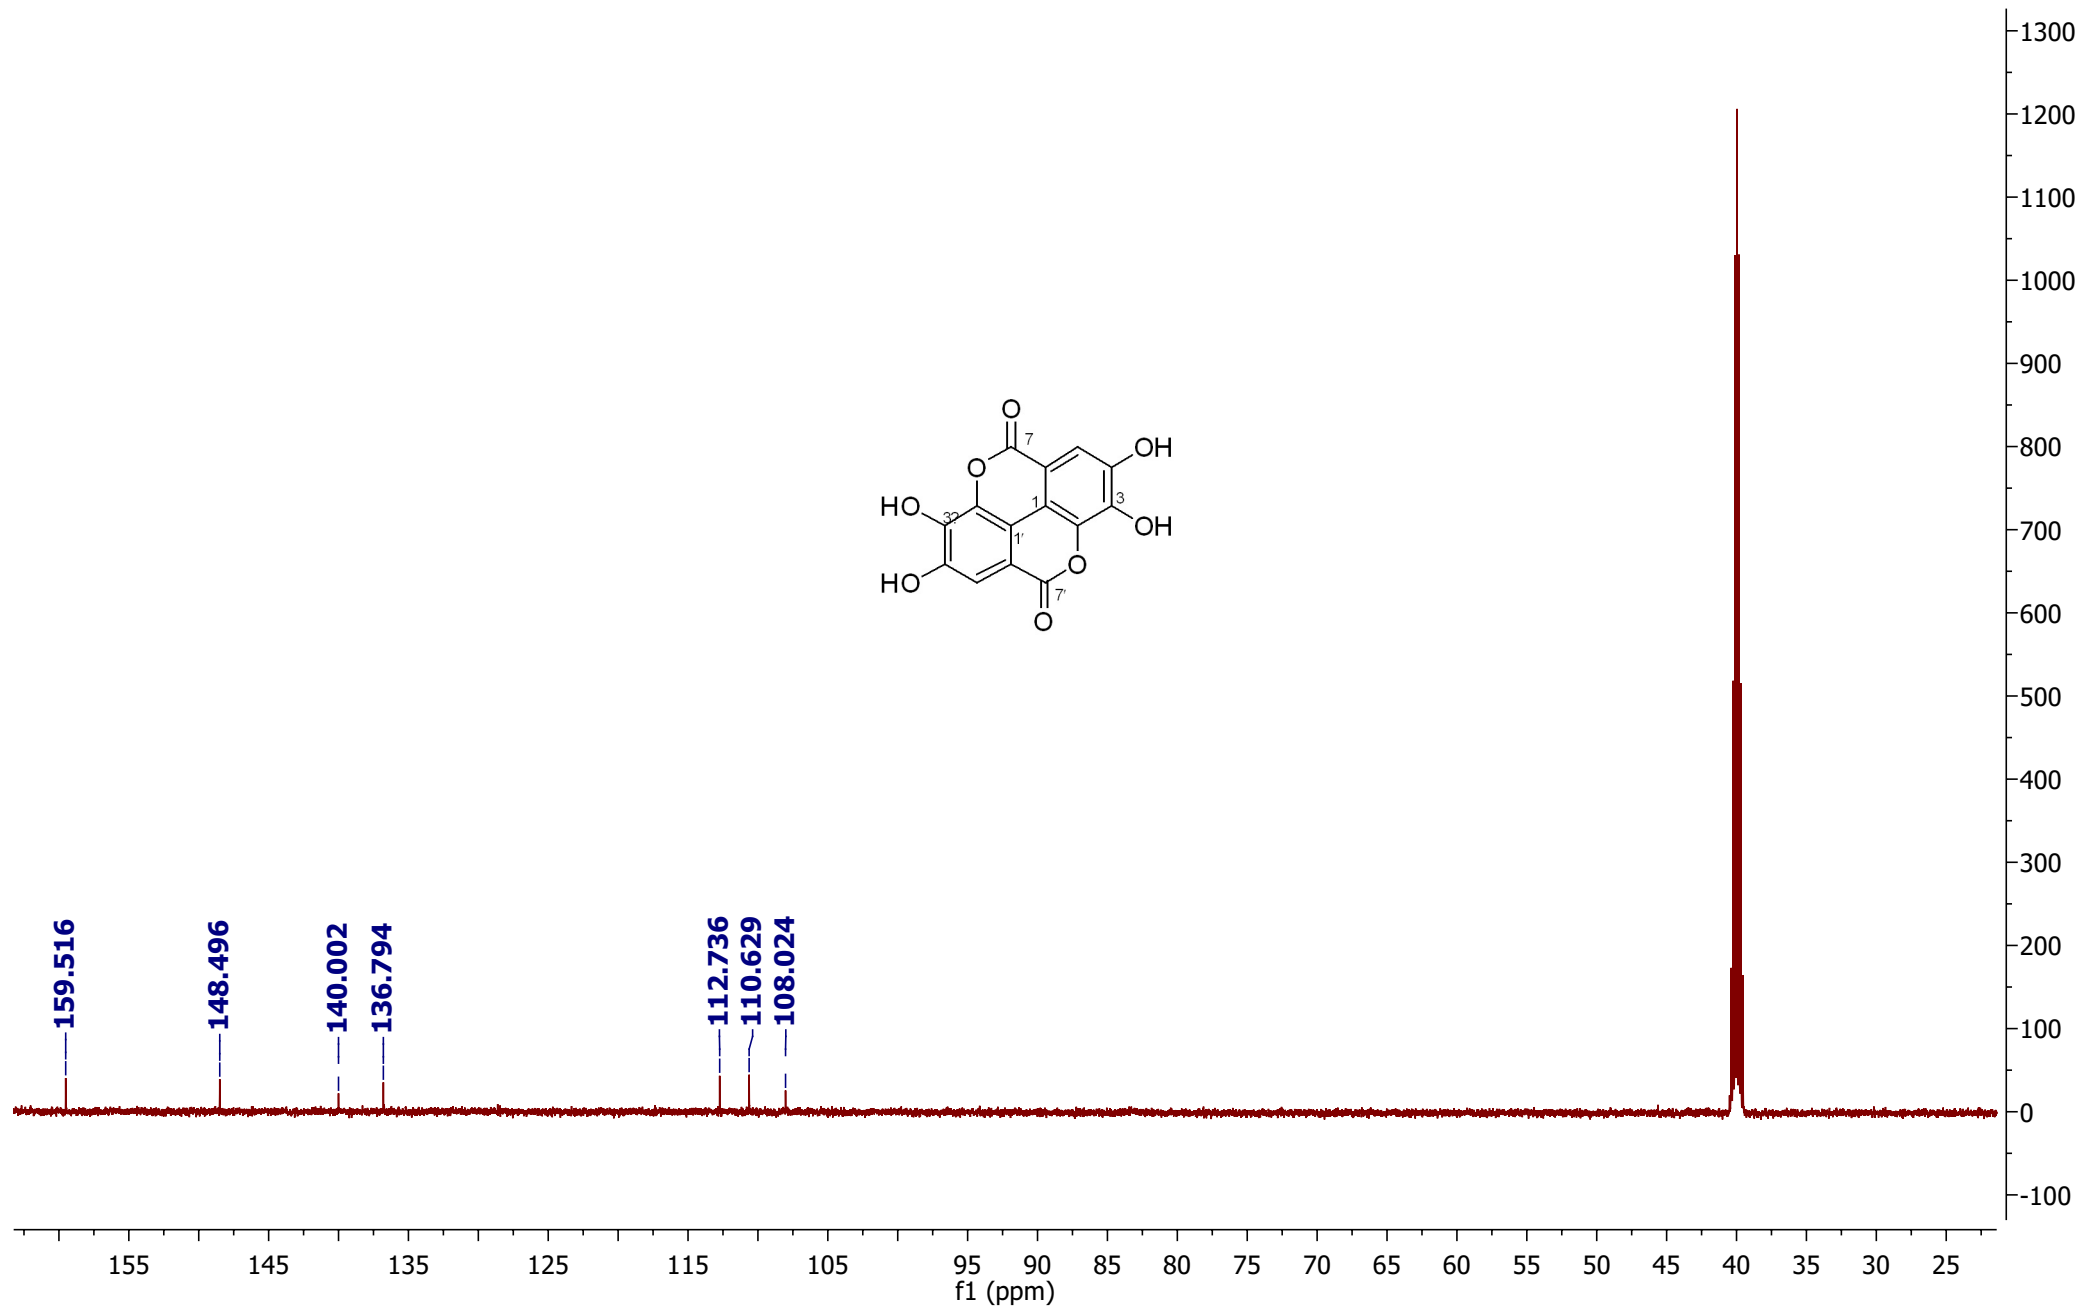

**Figure S28.**  $^{13}\text{C}$  NMR spectrum of compound **4** (151 MHz,  $\text{DMSO}-d_6$ )

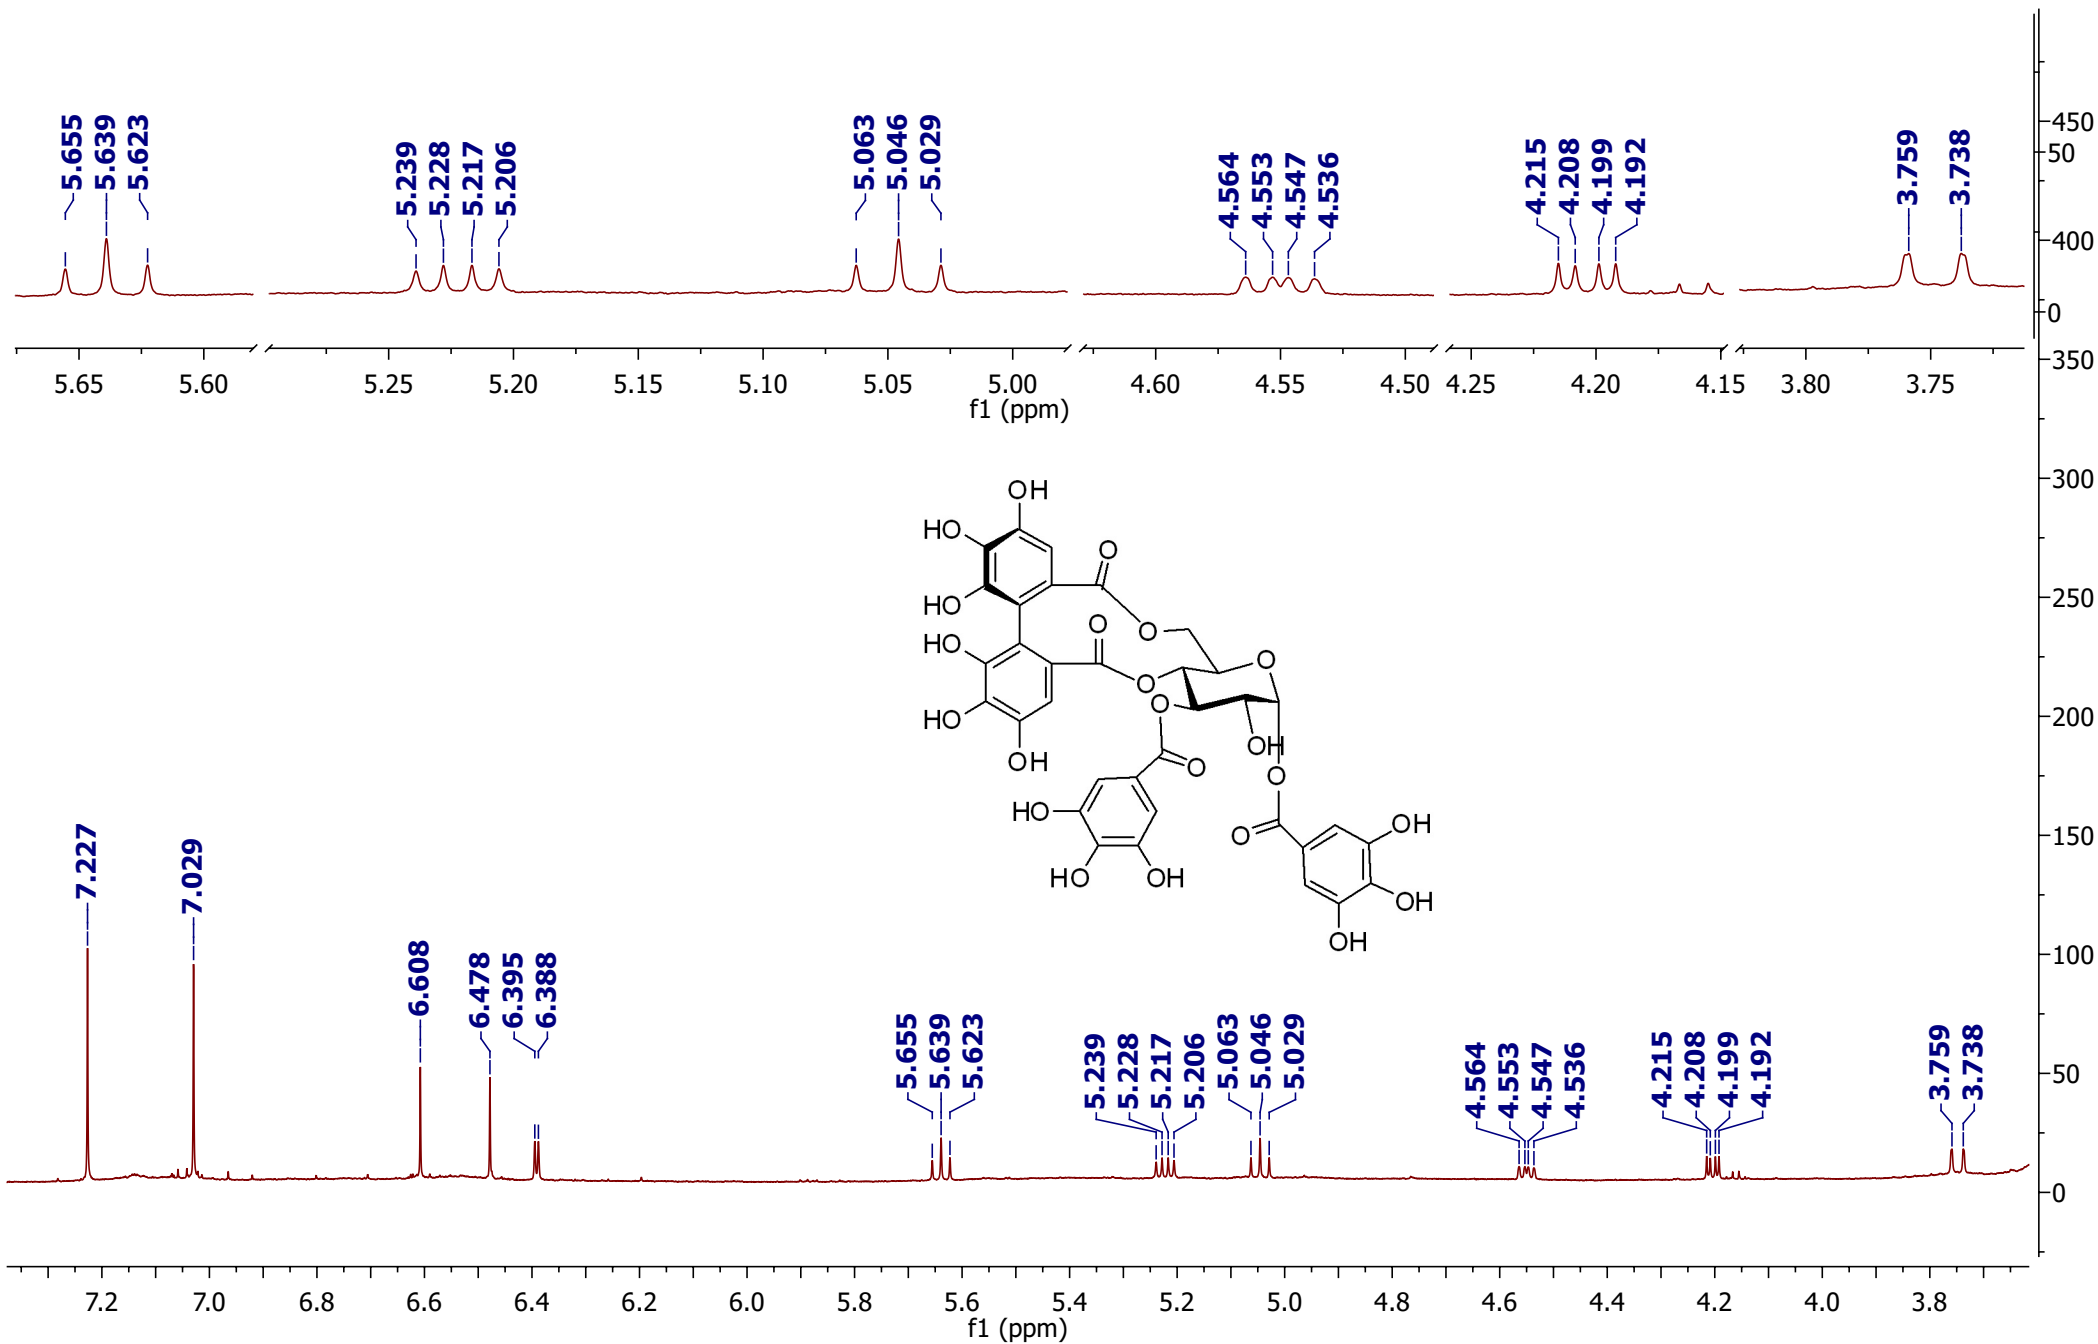

**Figure S29.**  $^1\text{H}$  NMR spectrum of compound **5** [600 MHz, acetone- $d_6$  +  $\text{D}_2\text{O}$  (9+1)]

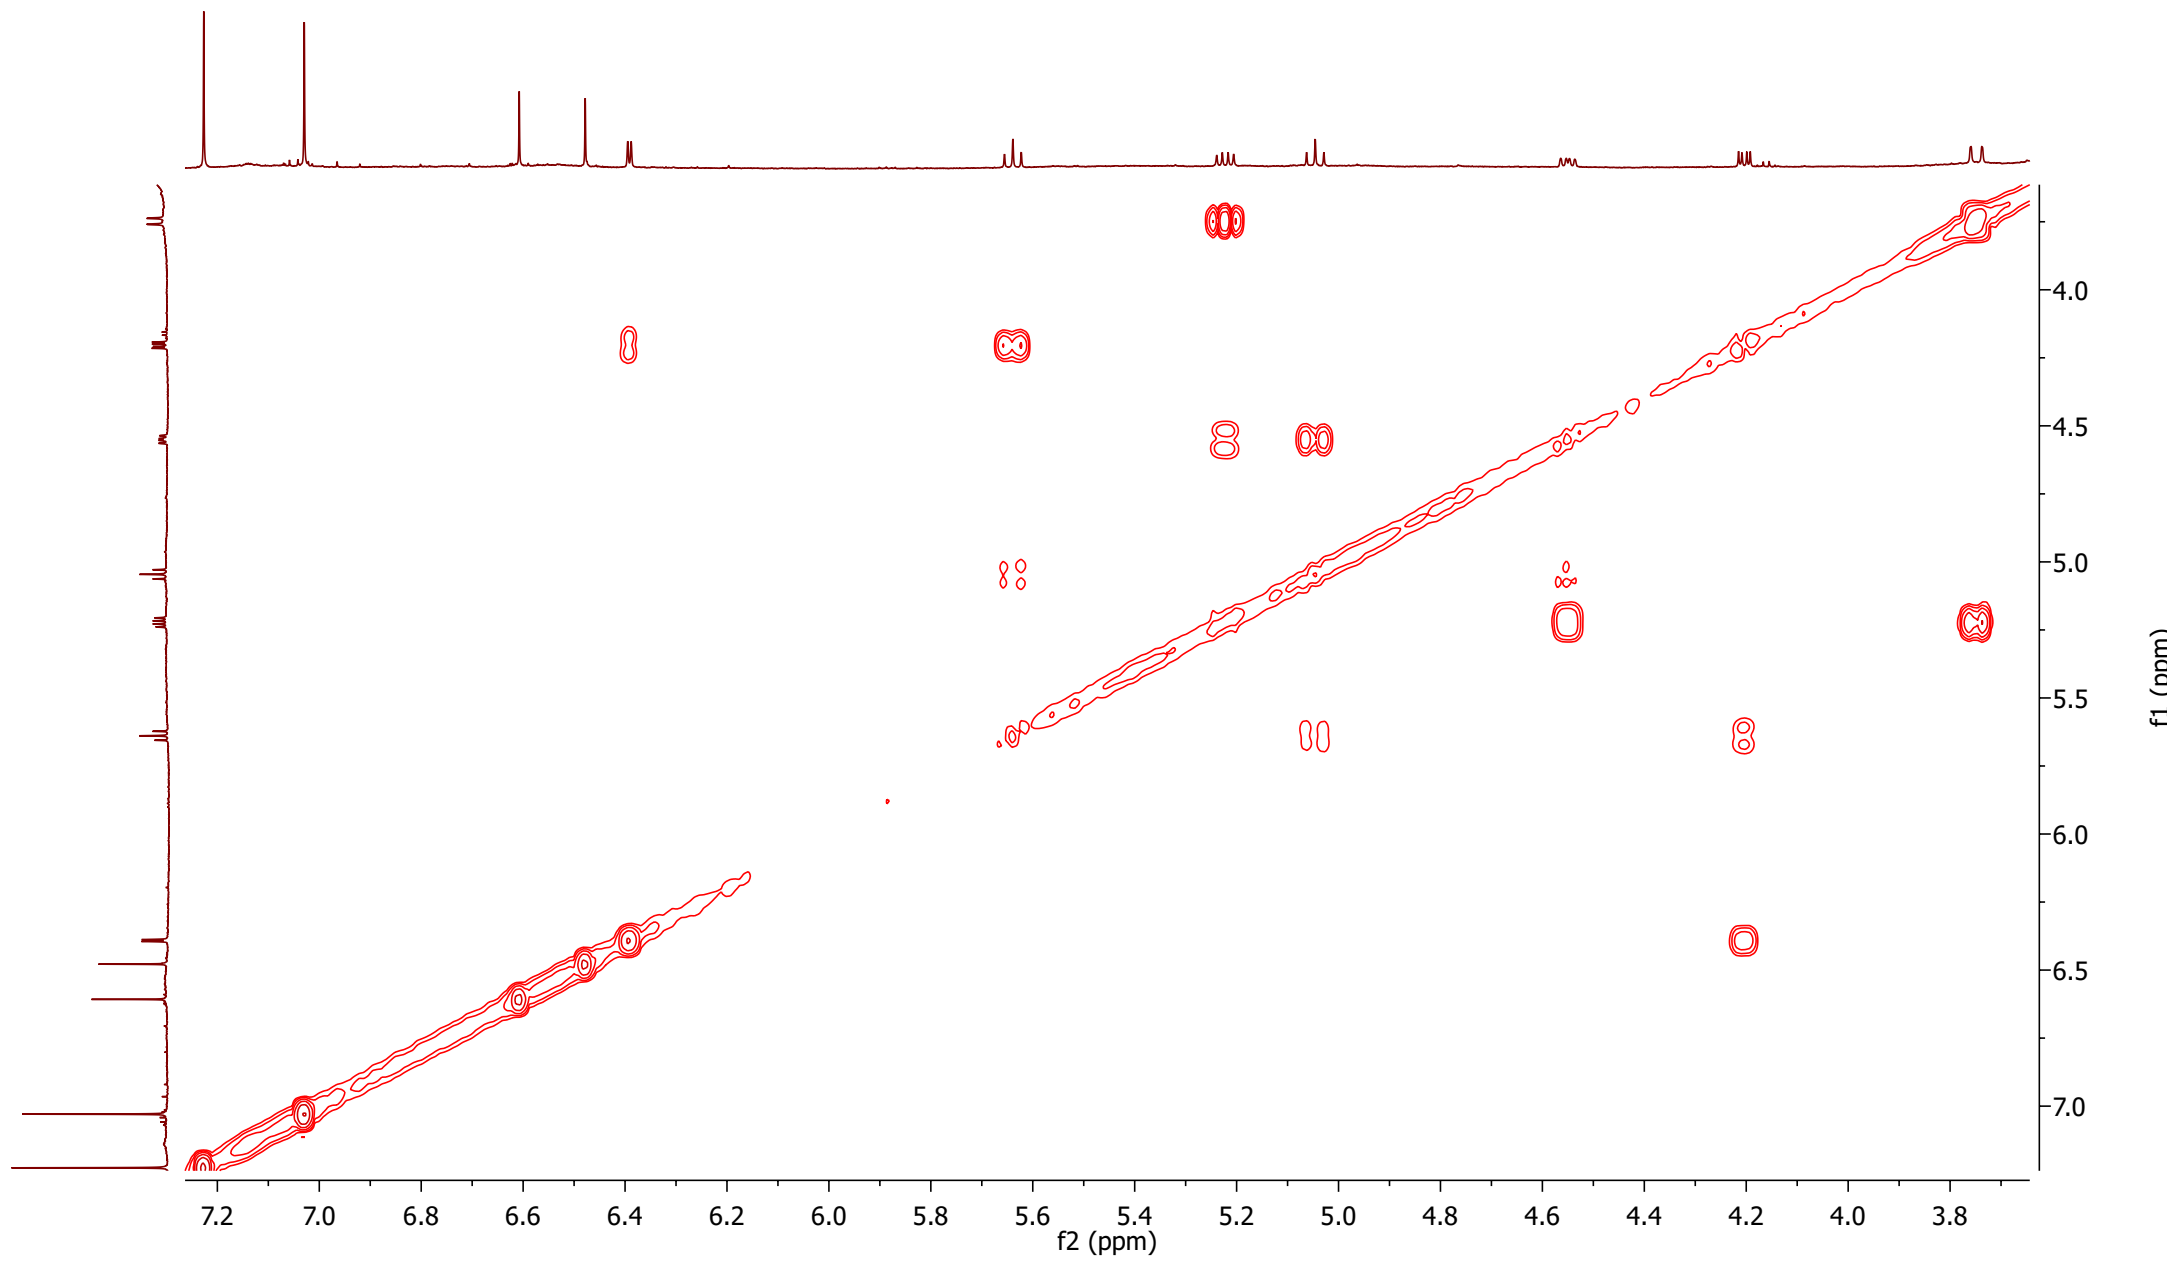

**Figure S30.**  $^1\text{H}$ - $^1\text{H}$  COSY spectrum of compound **5** [600 MHz, acetone- $d_6$  +  $\text{D}_2\text{O}$  (9+1)]

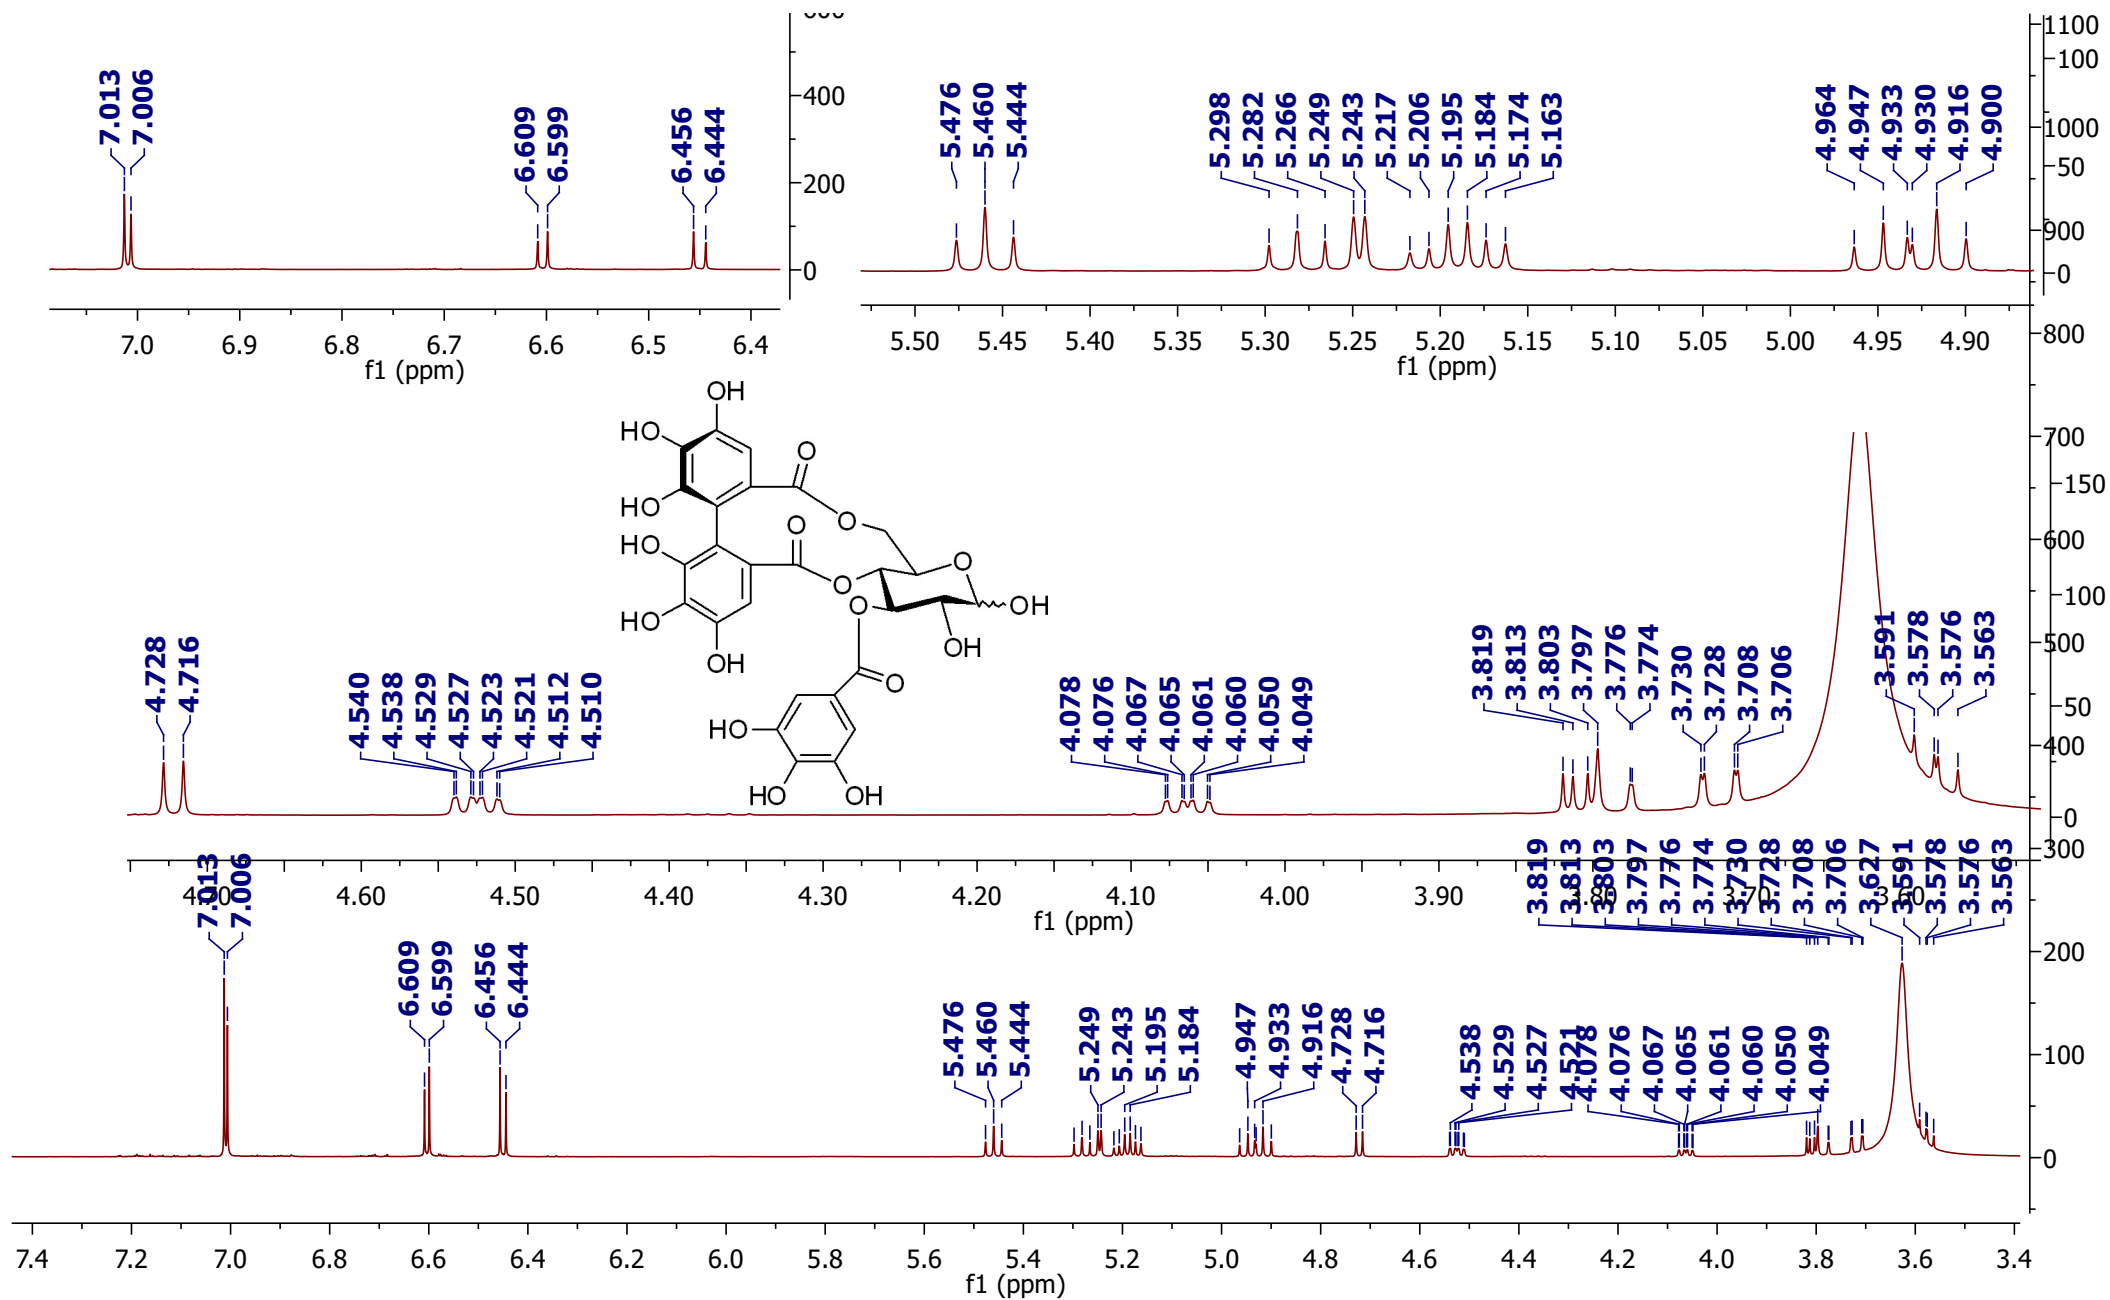

**Figure S31.**  $^1\text{H}$  NMR spectrum of compound **6** [600 MHz, acetone- $d_6$  +  $\text{D}_2\text{O}$  (9+1)]

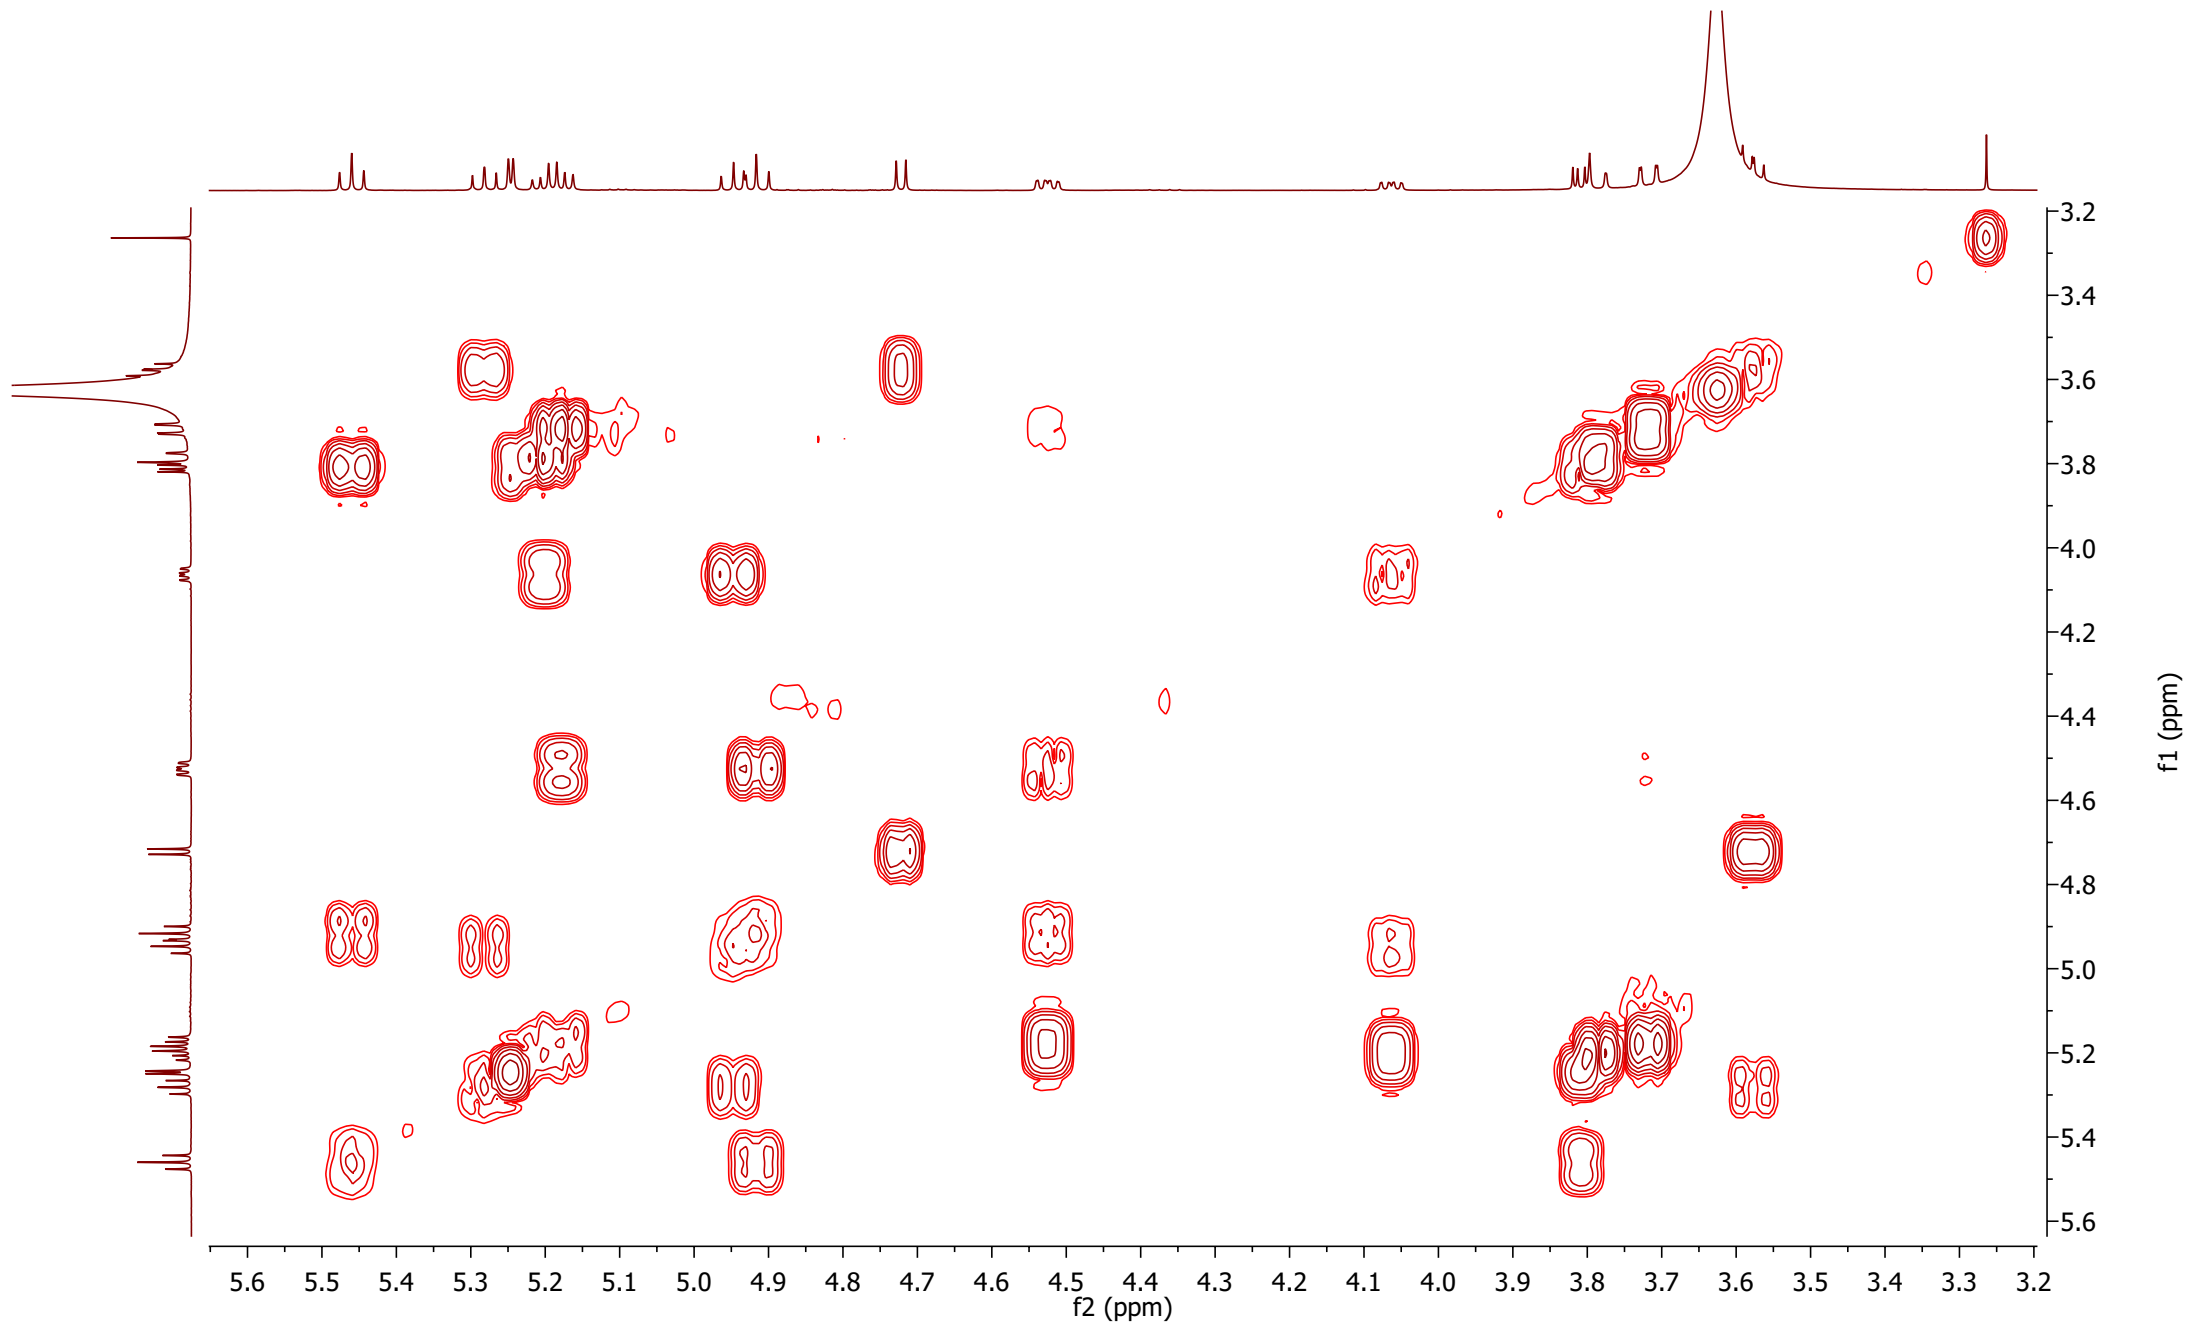

**Figure S32.**  $^1\text{H}$ - $^1\text{H}$  COSY spectrum of compound **6** [600 MHz, acetone- $d_6$  +  $\text{D}_2\text{O}$  (9+1)]

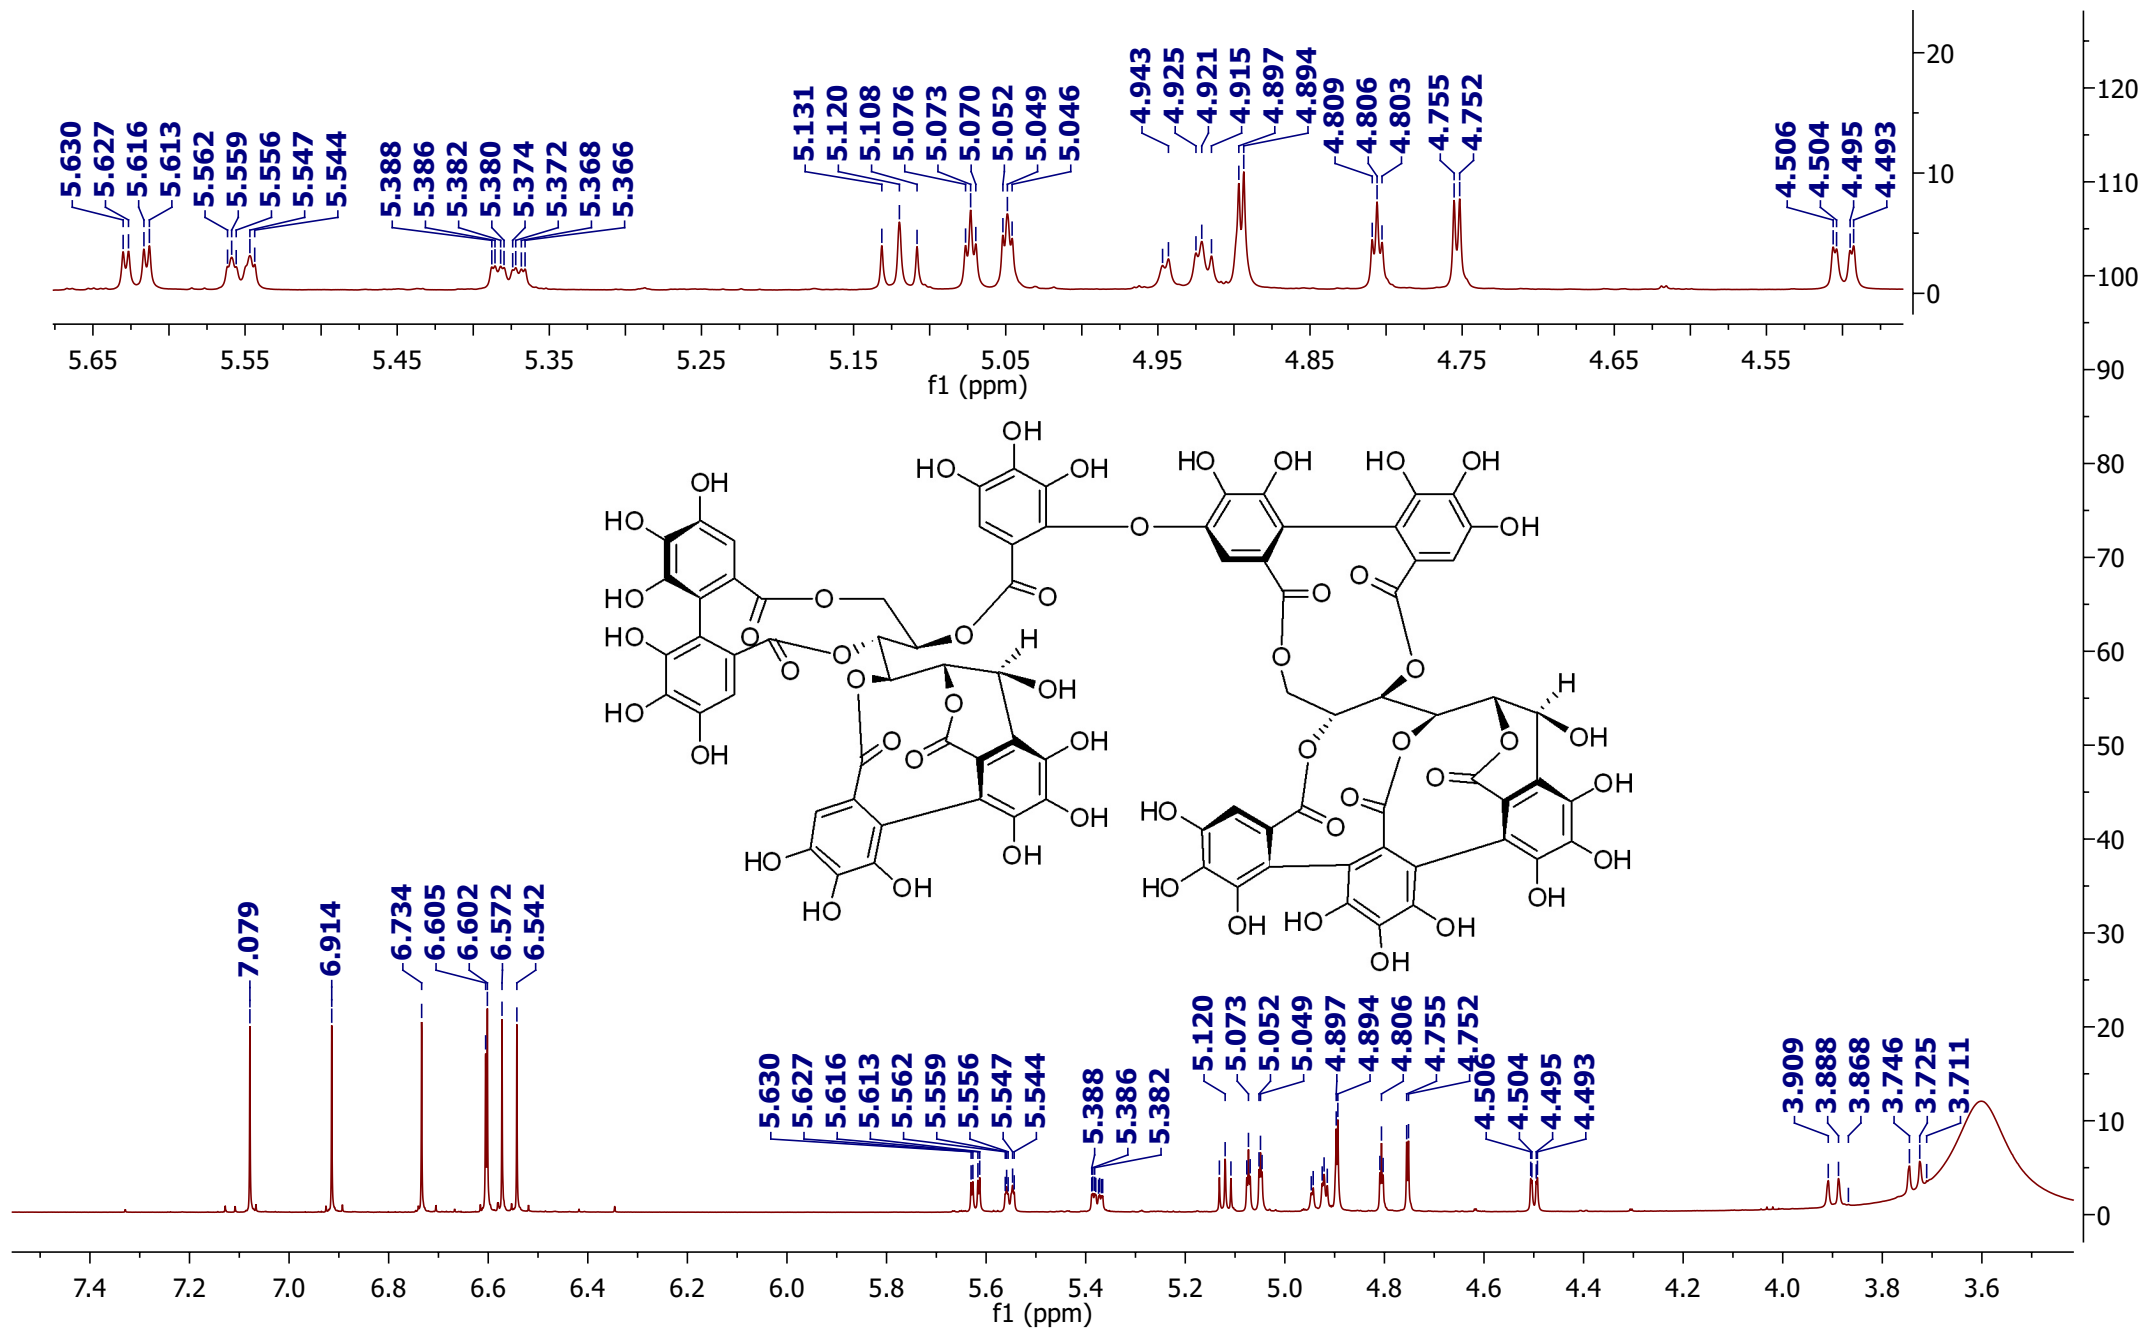

**Figure S33.**  $^1\text{H}$  NMR spectrum of compound **7** [600 MHz, acetone- $d_6$  +  $\text{D}_2\text{O}$  (9+1)]



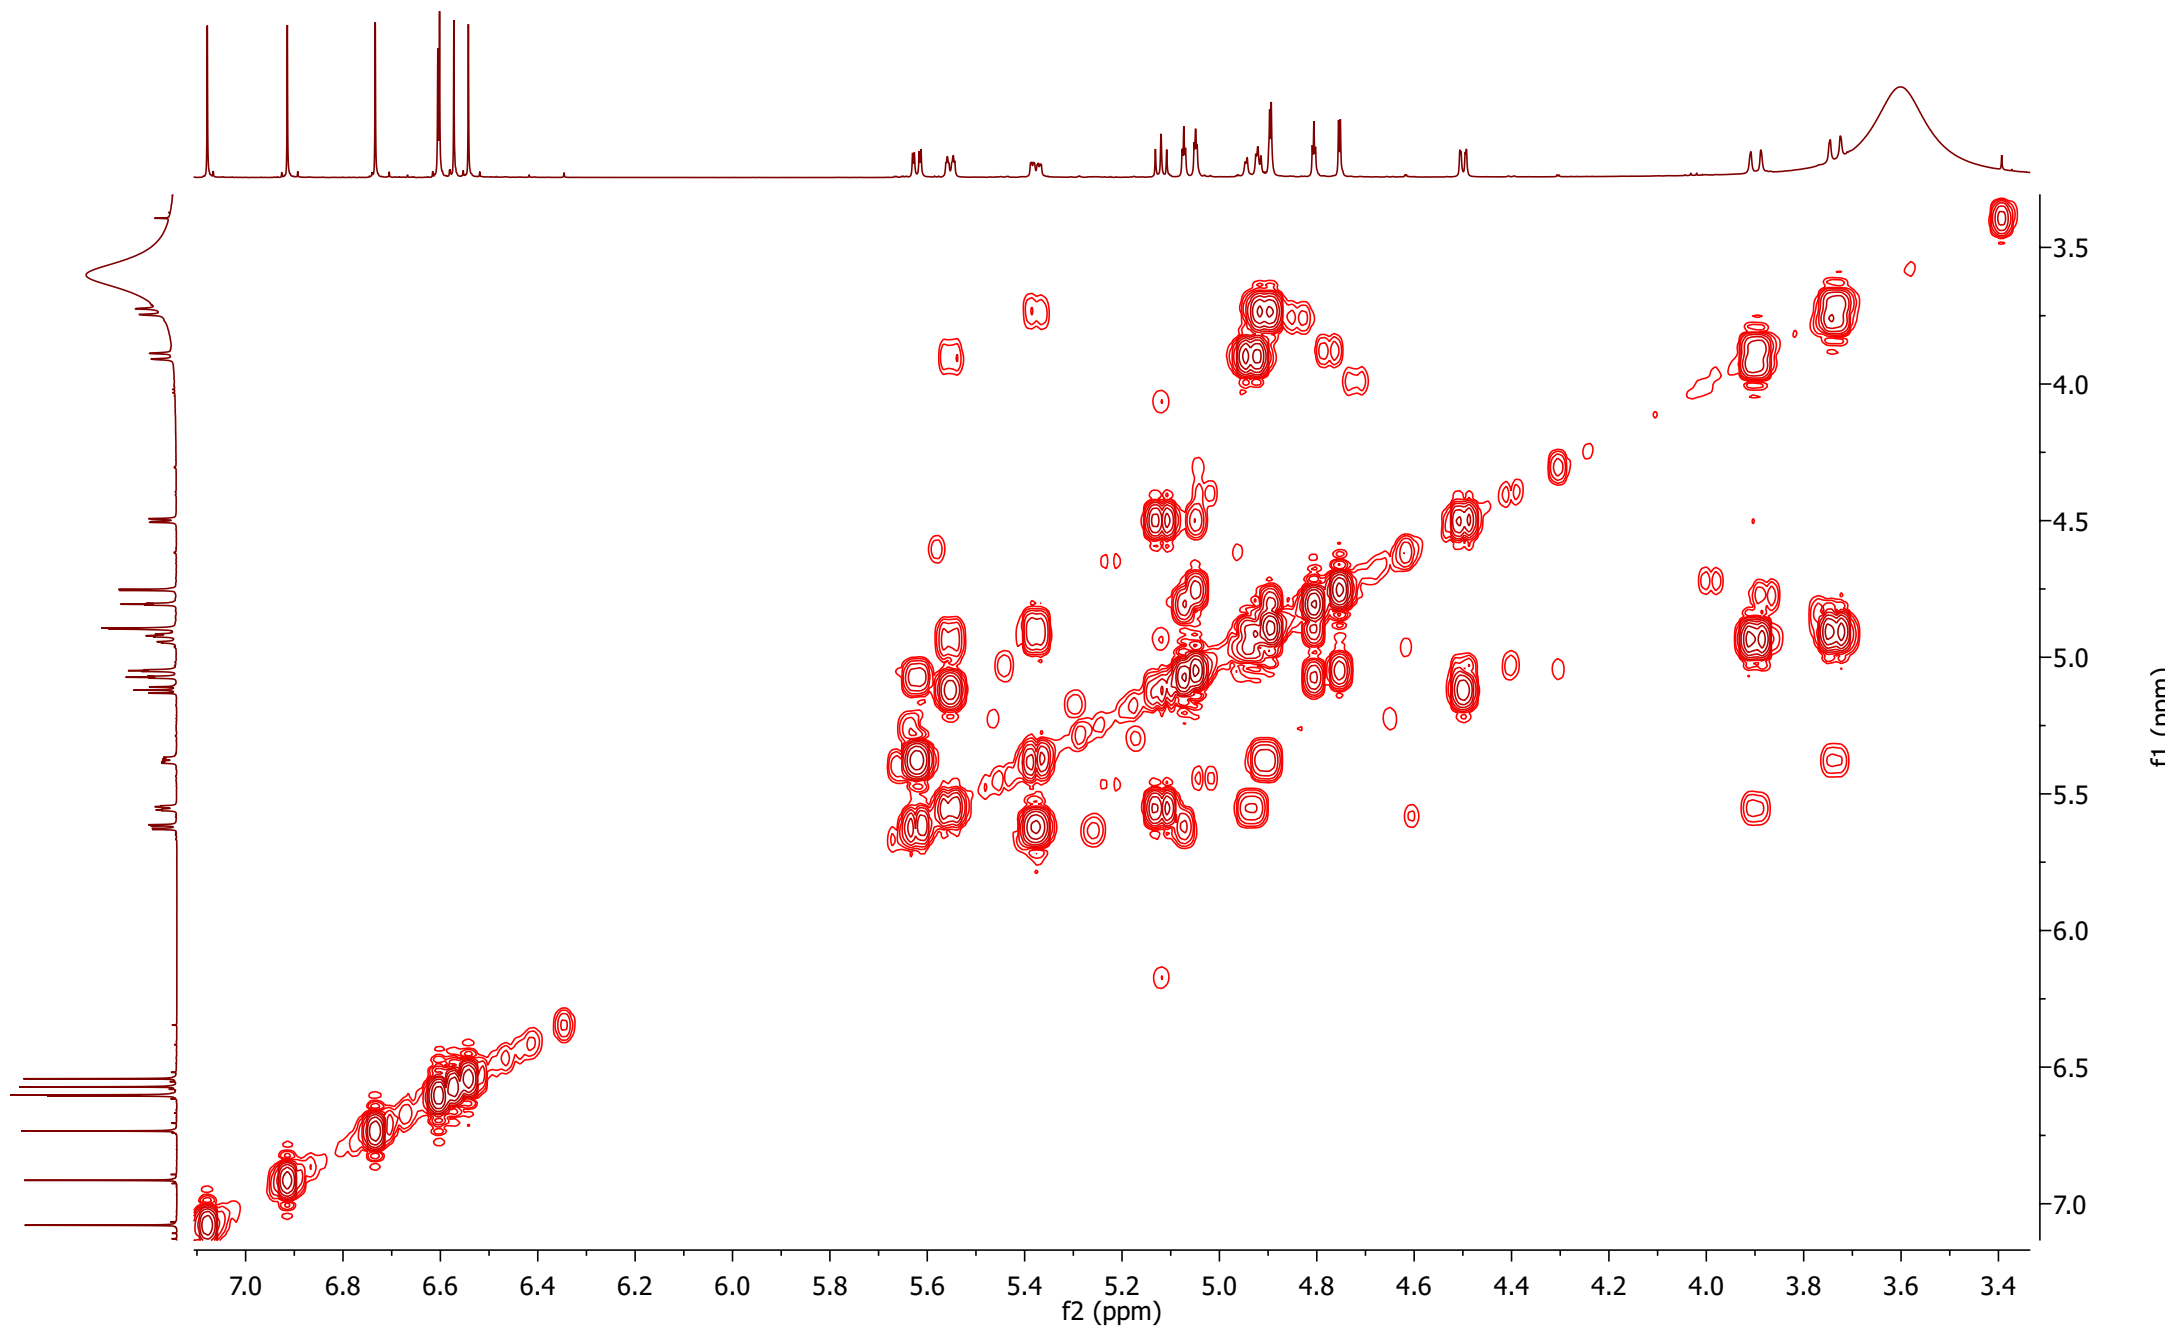

**Figure S34.**  $^1\text{H}$ - $^1\text{H}$  COSY spectrum of compound **7** [600 MHz, acetone- $d_6$  +  $\text{D}_2\text{O}$  (9+1)]

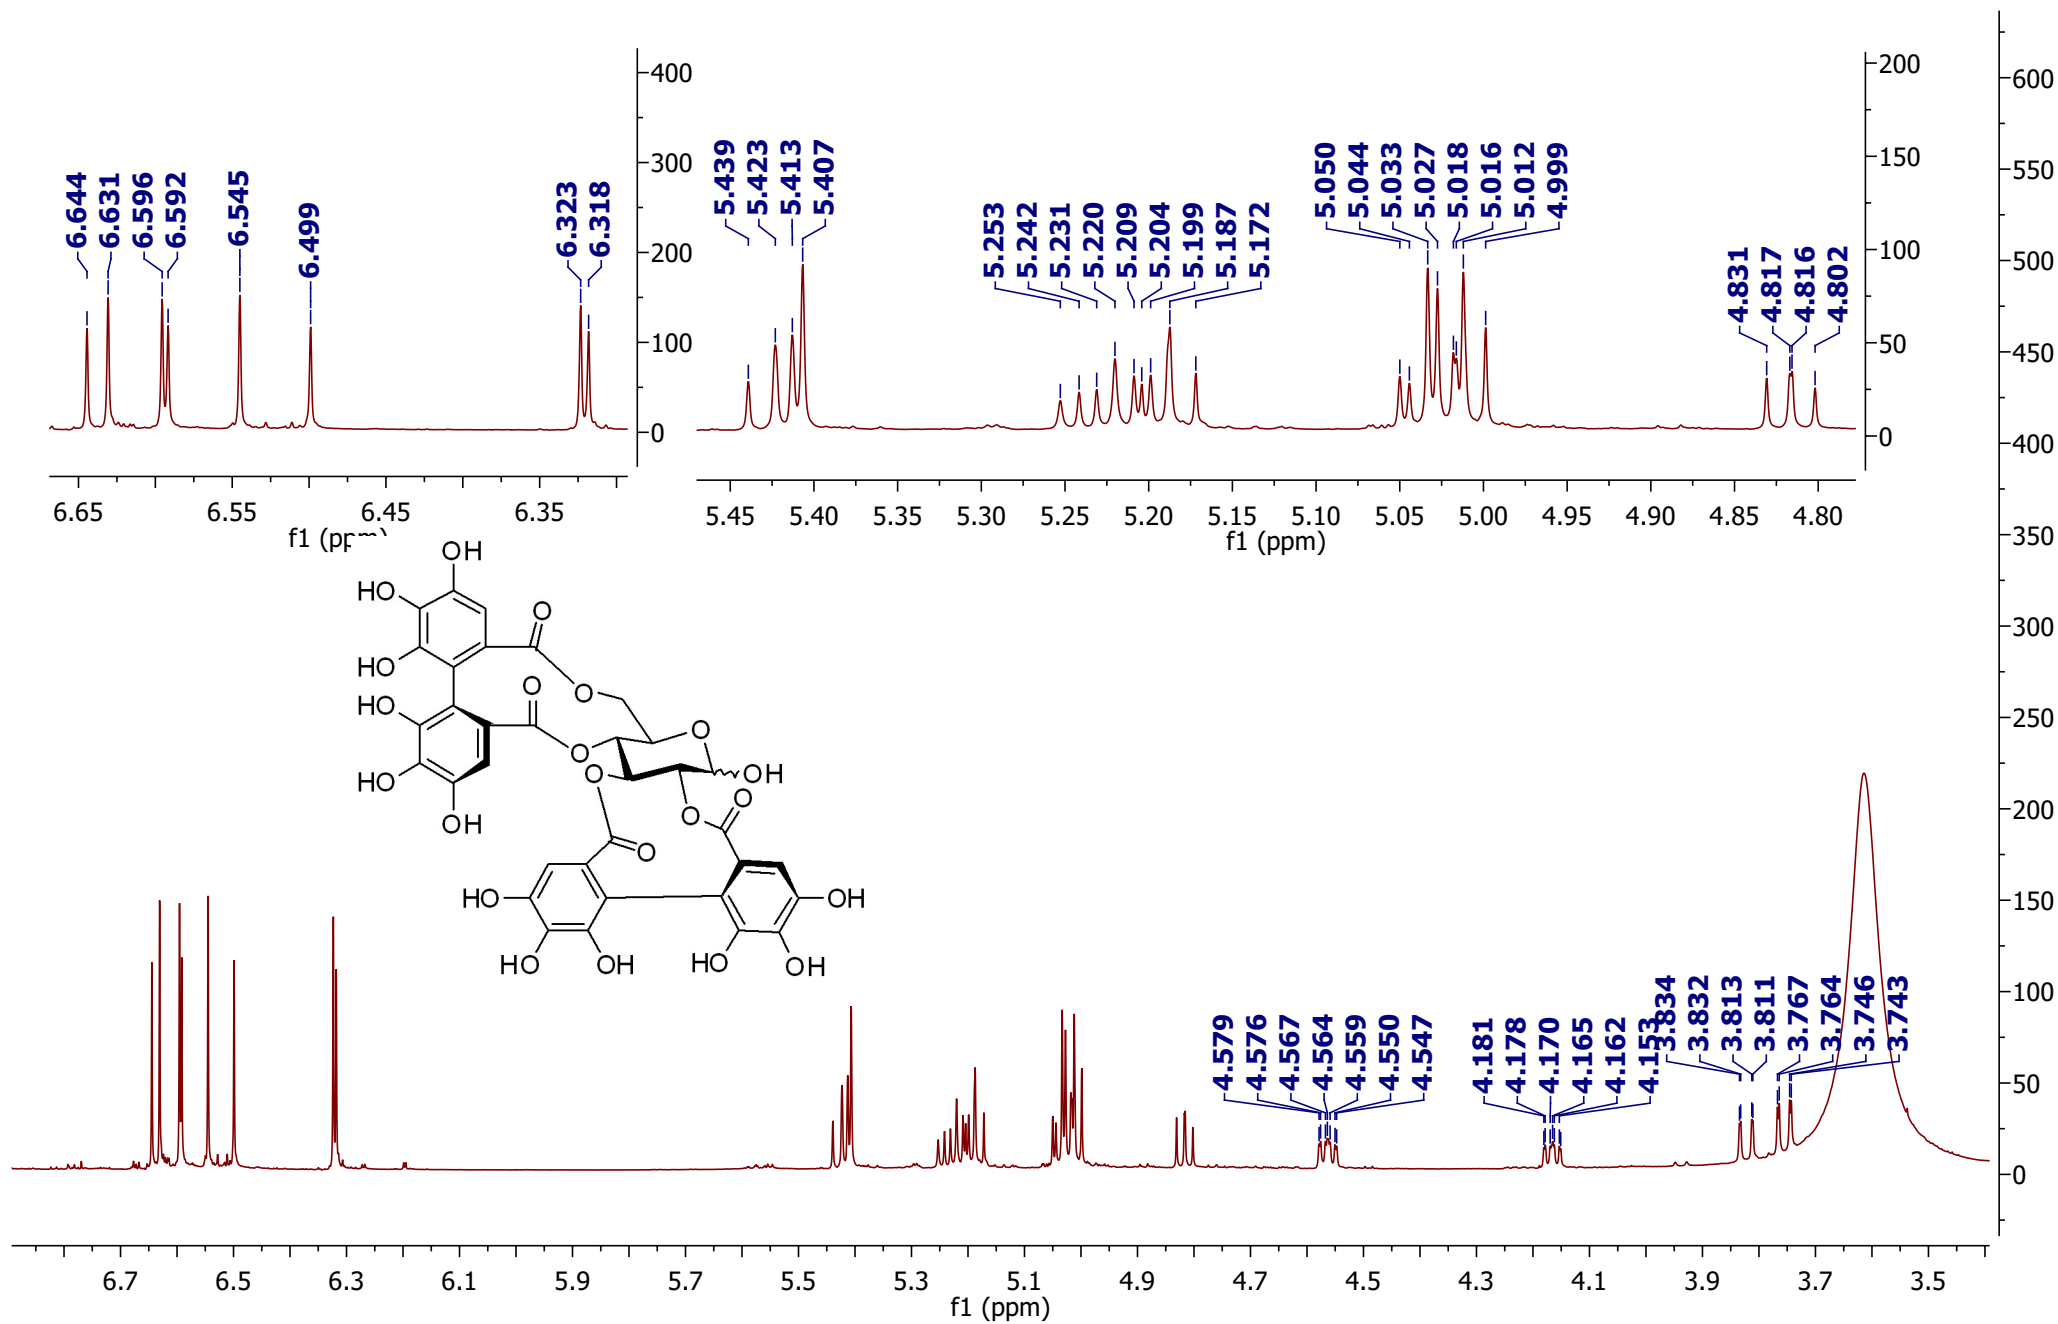

**Figure S35.**  $^1\text{H}$  NMR spectrum of compound **8** [600 MHz, acetone- $d_6$  +  $\text{D}_2\text{O}$  (9+1)]

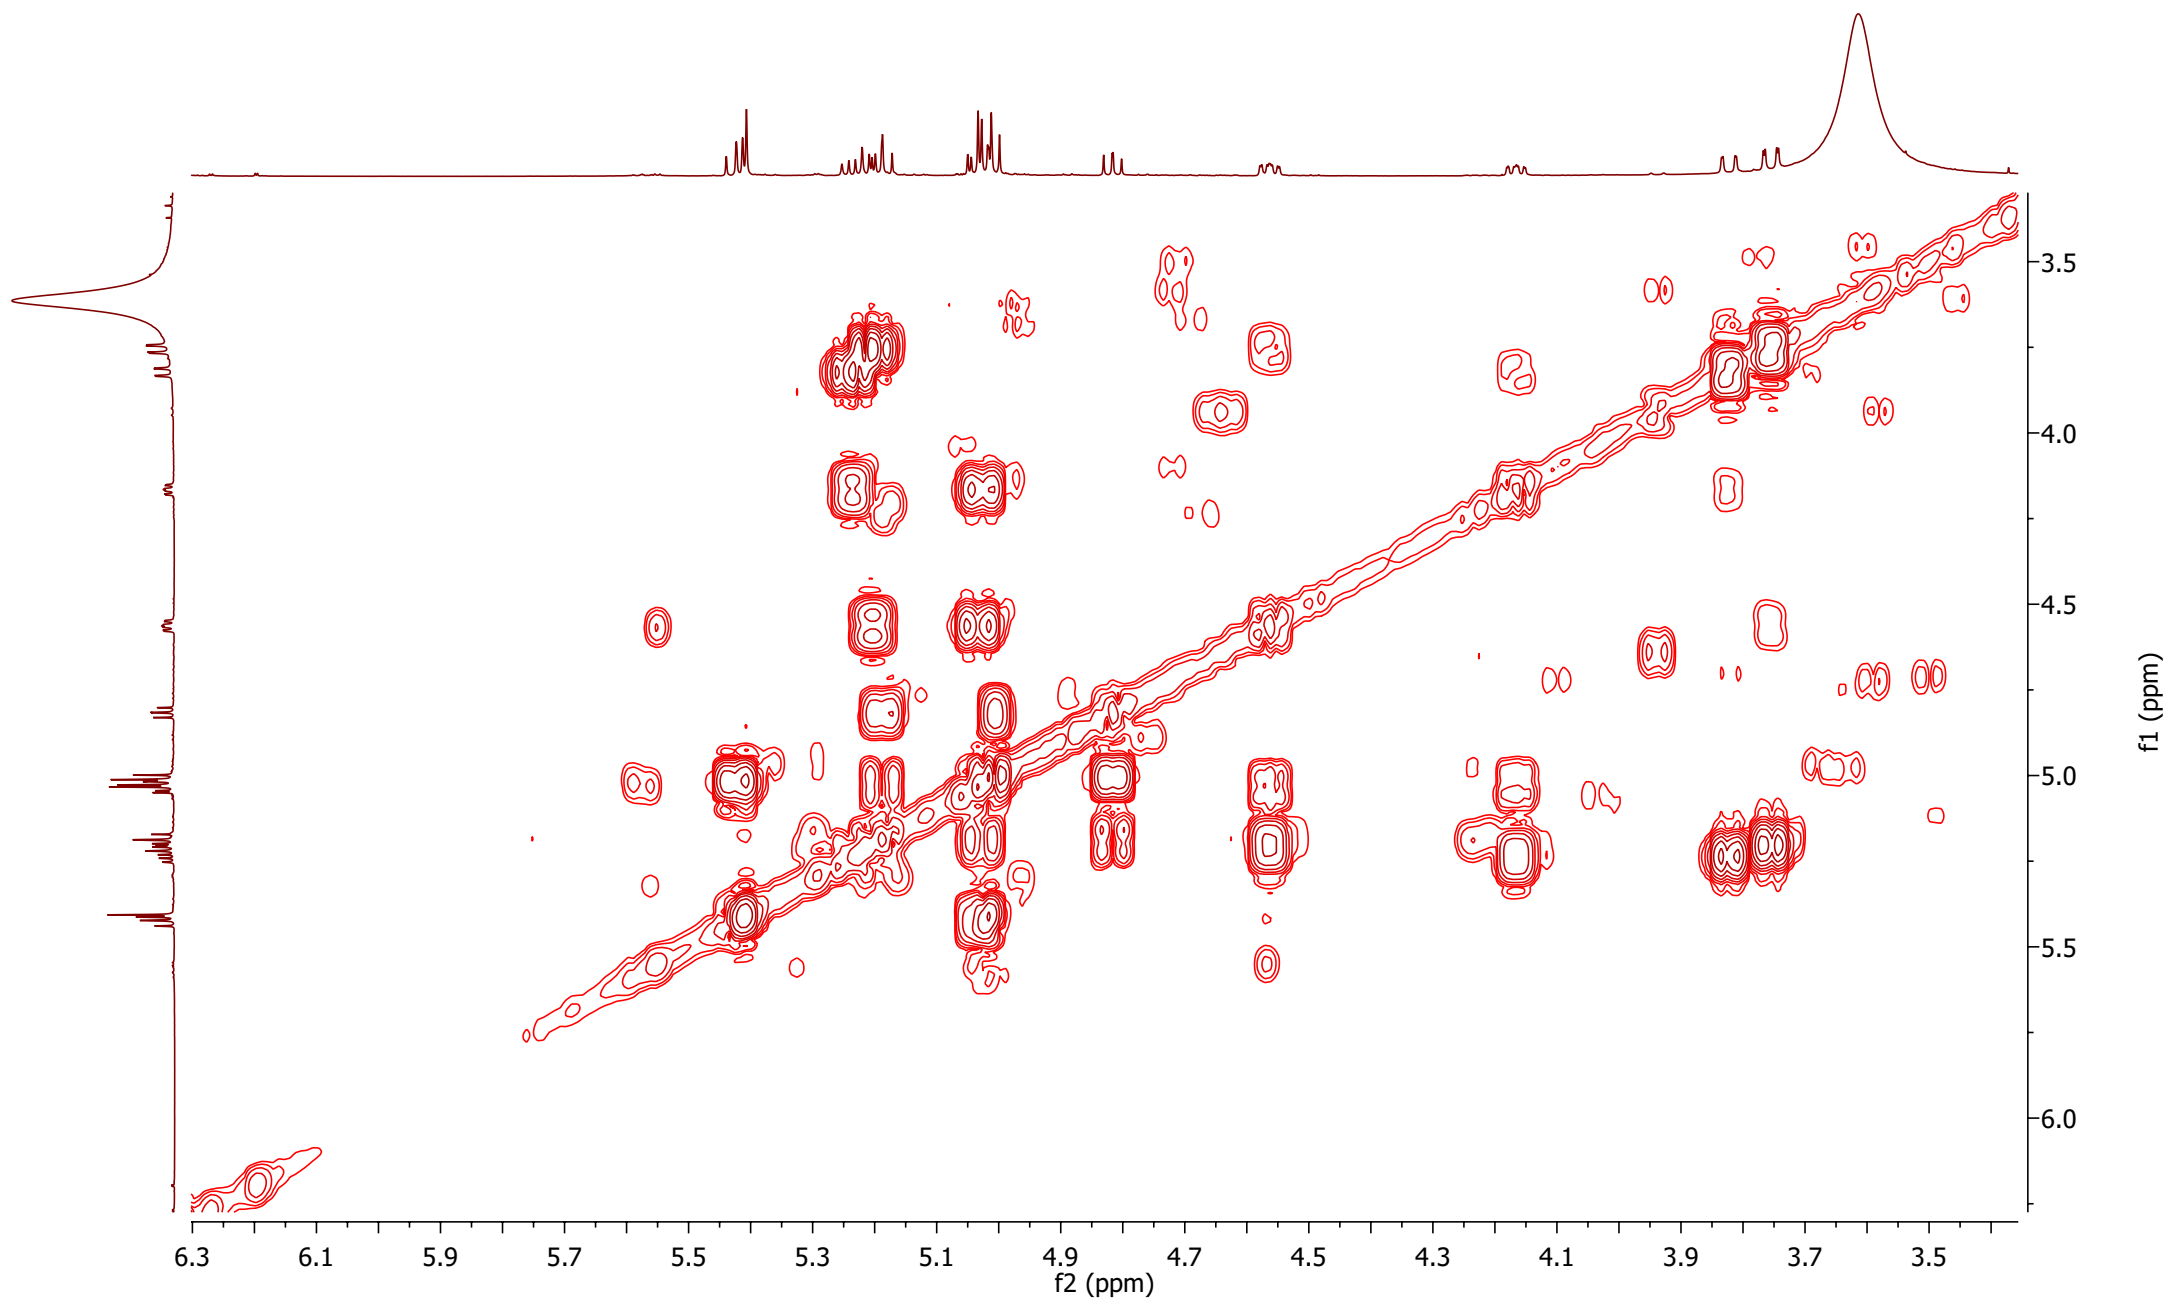

**Figure S36.**  $^1\text{H}$ - $^1\text{H}$  COSY spectrum of compound **8** [600 MHz, acetone- $d_6$  +  $\text{D}_2\text{O}$  (9+1)]

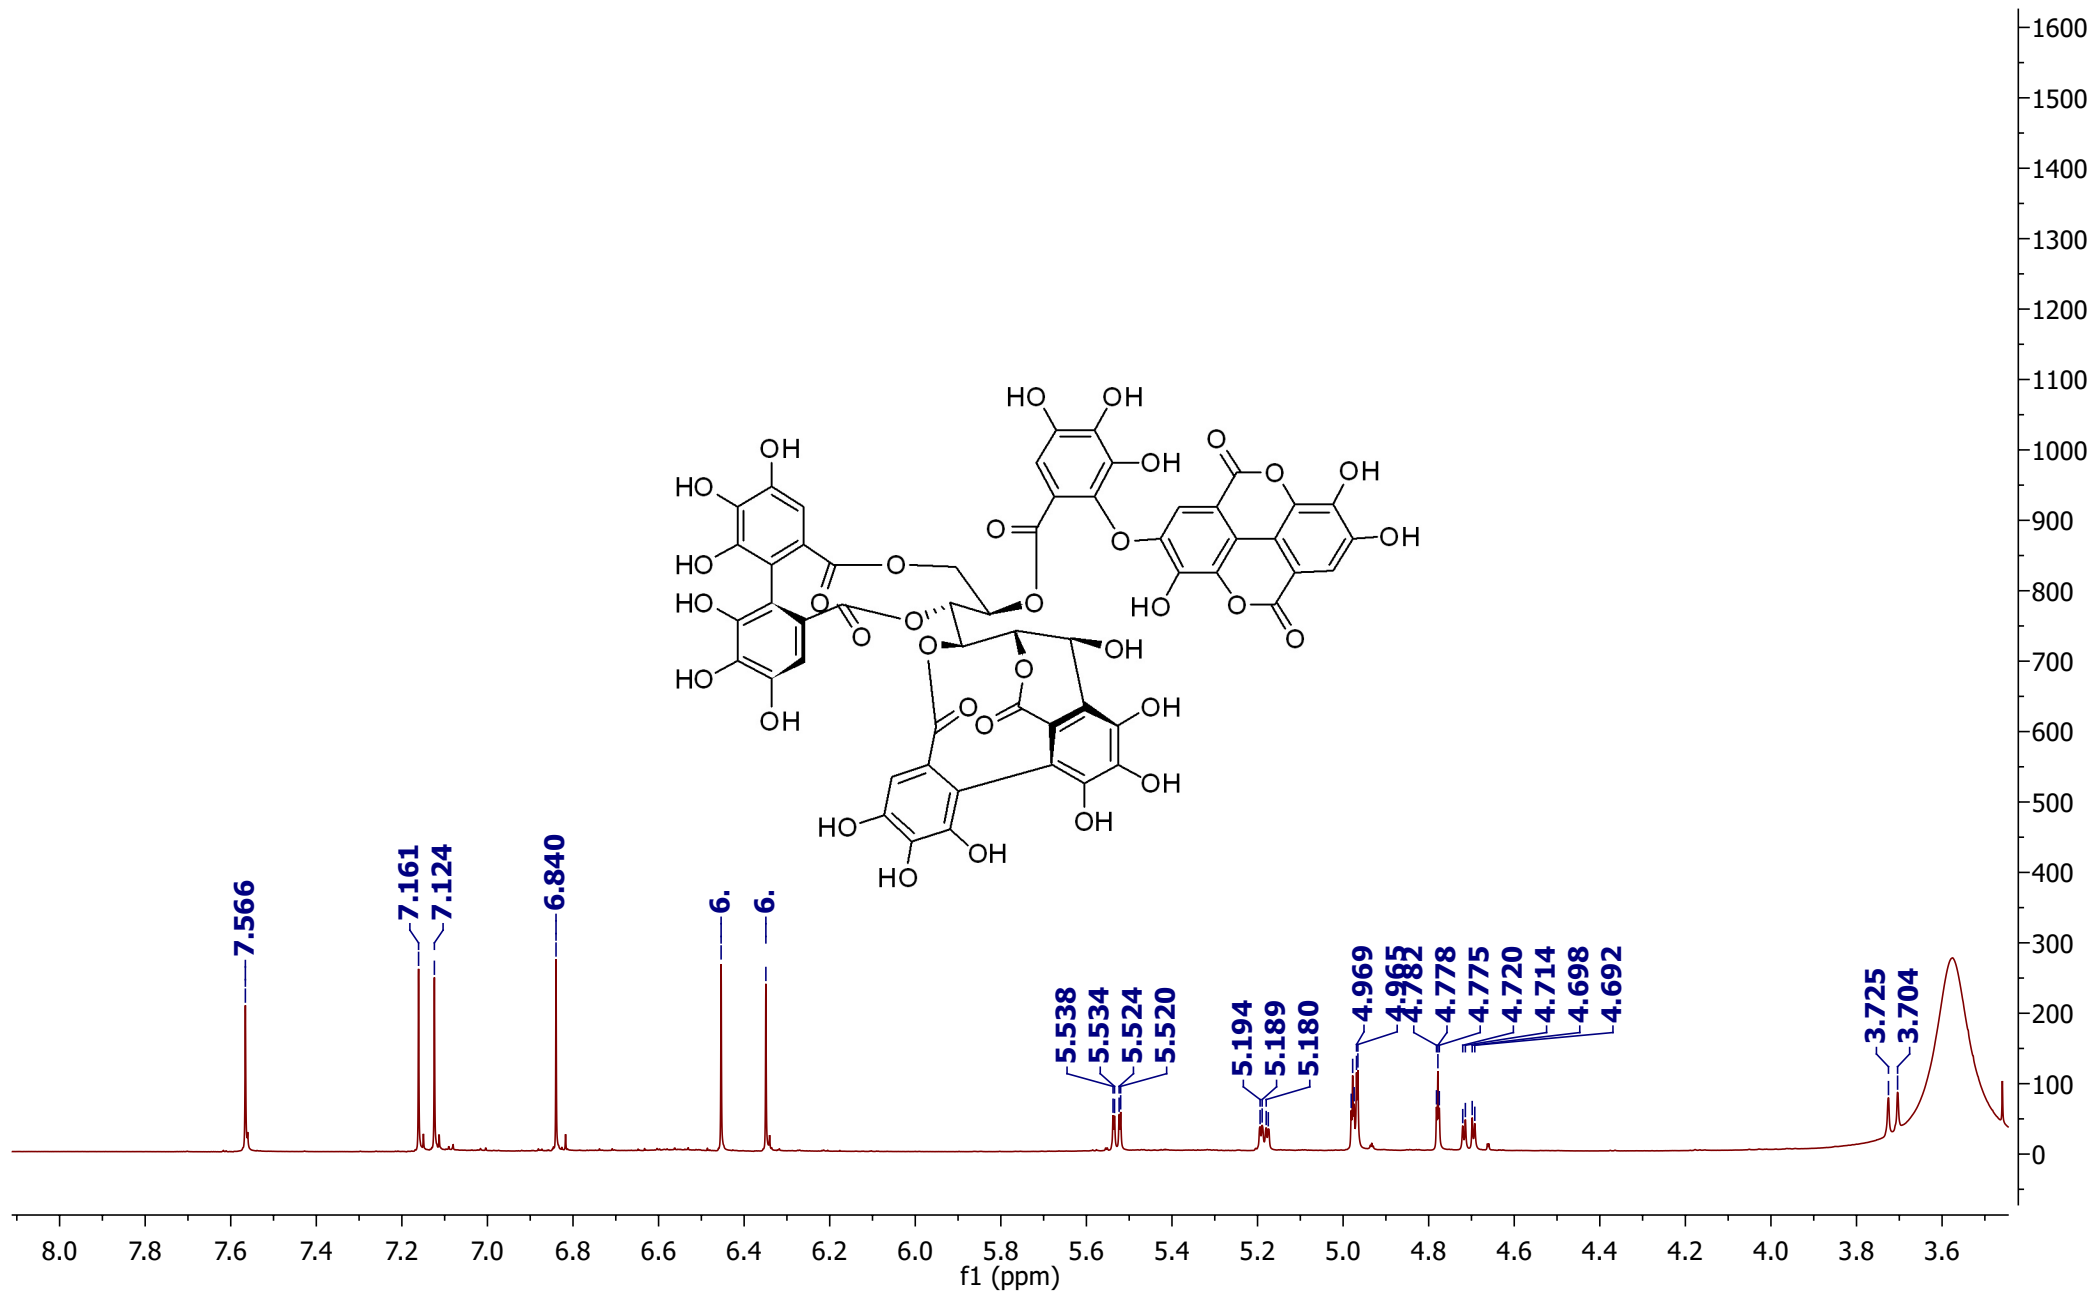

**Figure S37.**  $^1\text{H}$  NMR spectrum of compound **9** [600 MHz, acetone- $d_6$  +  $\text{D}_2\text{O}$  (9+1)]

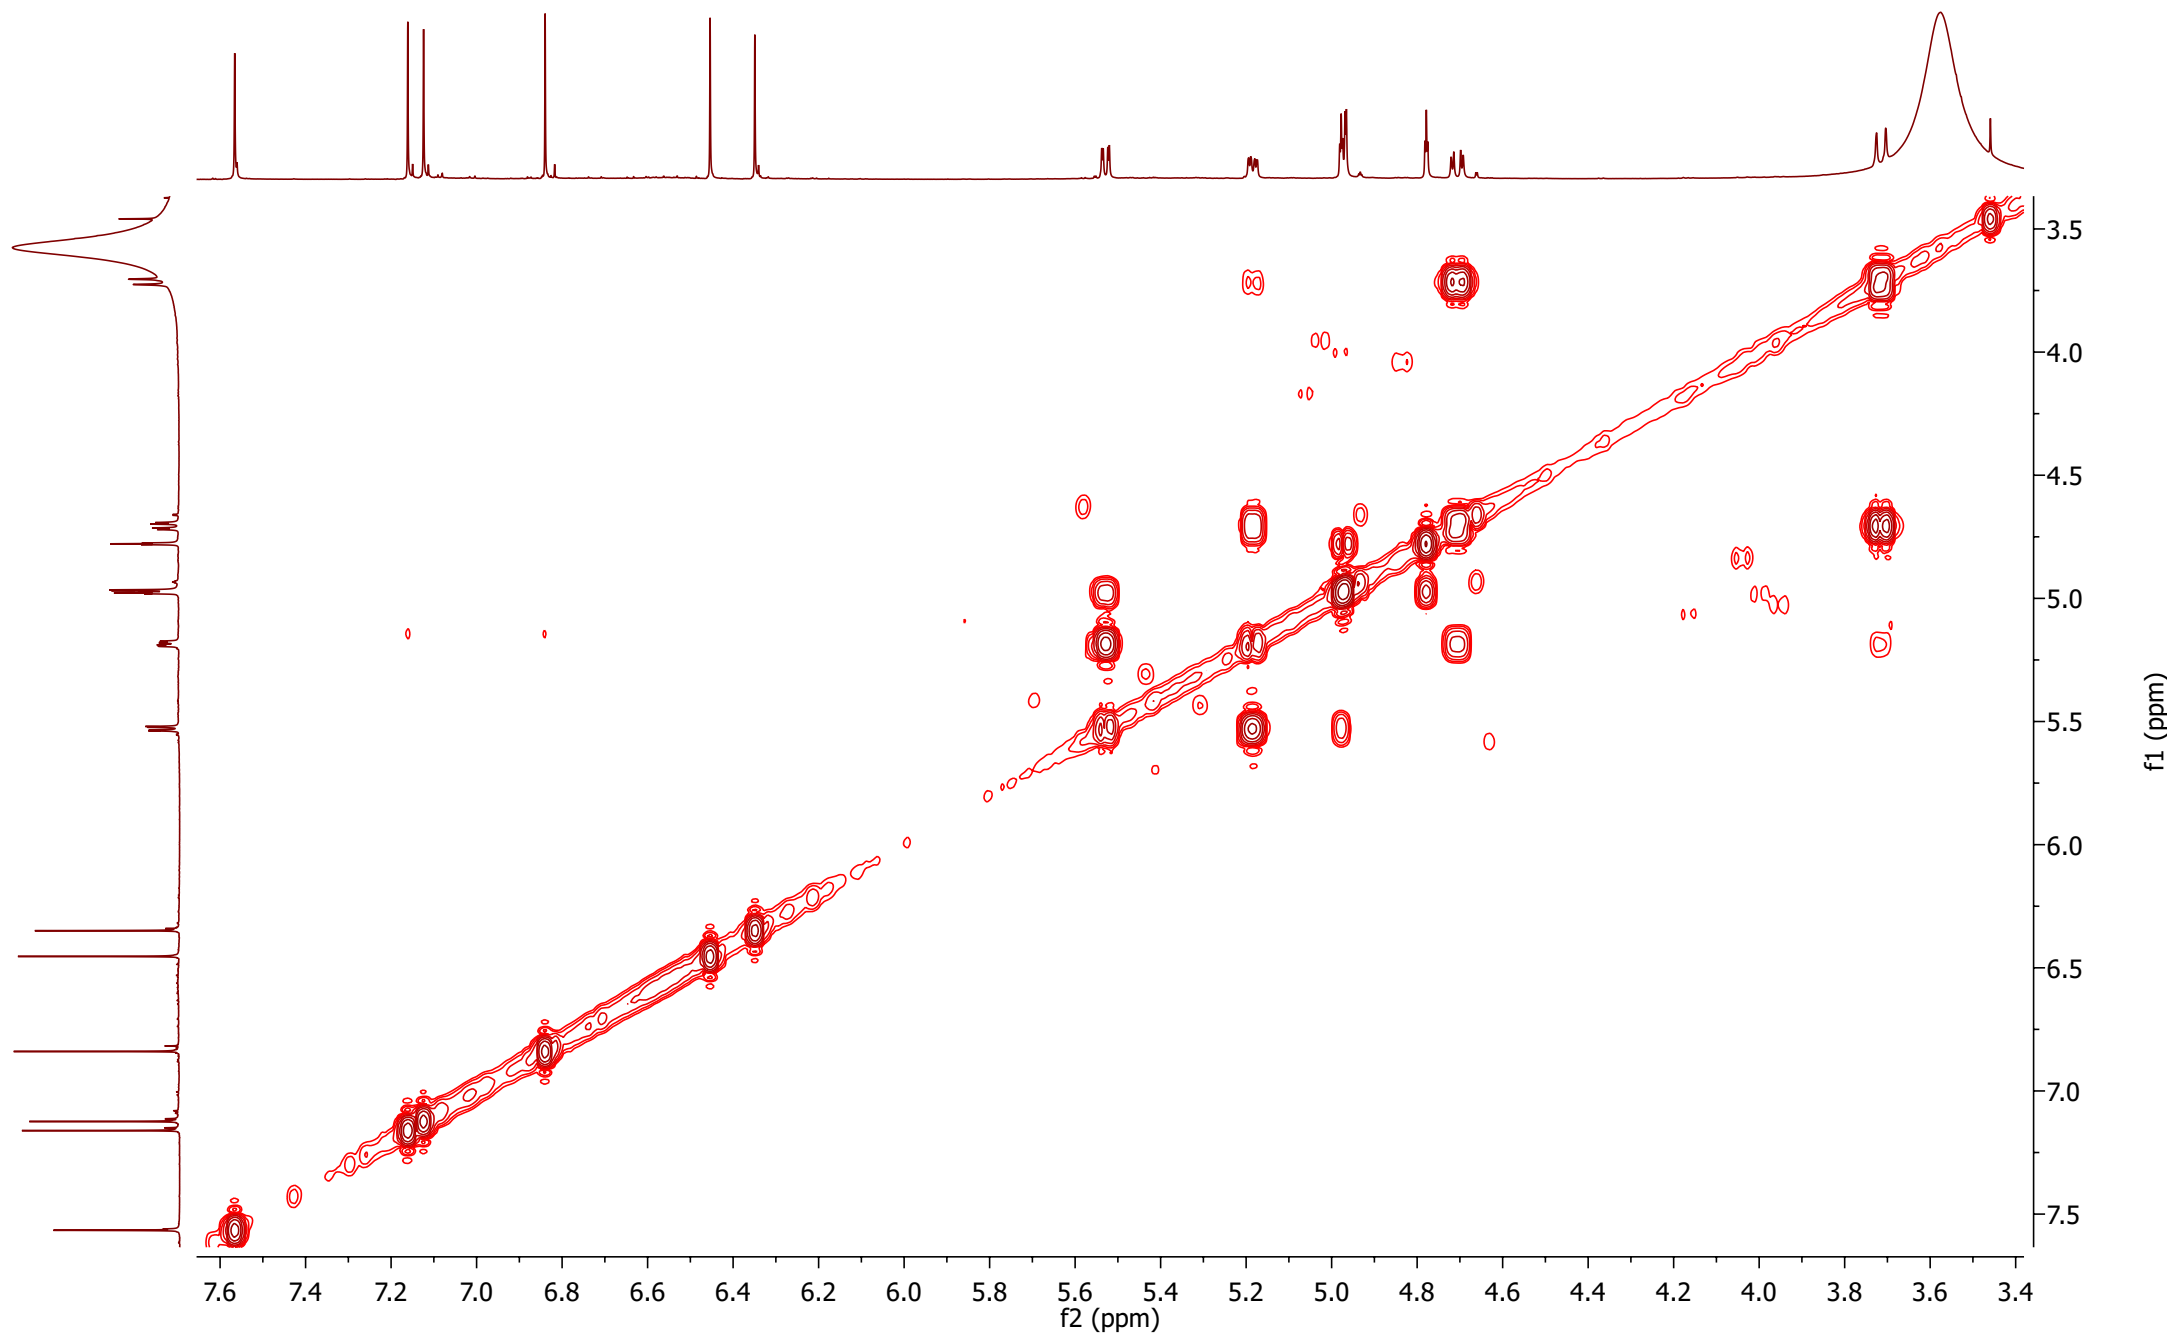

**Figure S38.**  $^1\text{H}$ - $^1\text{H}$  COSY spectrum of compound **9** [600 MHz, acetone- $d_6$  +  $\text{D}_2\text{O}$  (9+1)]

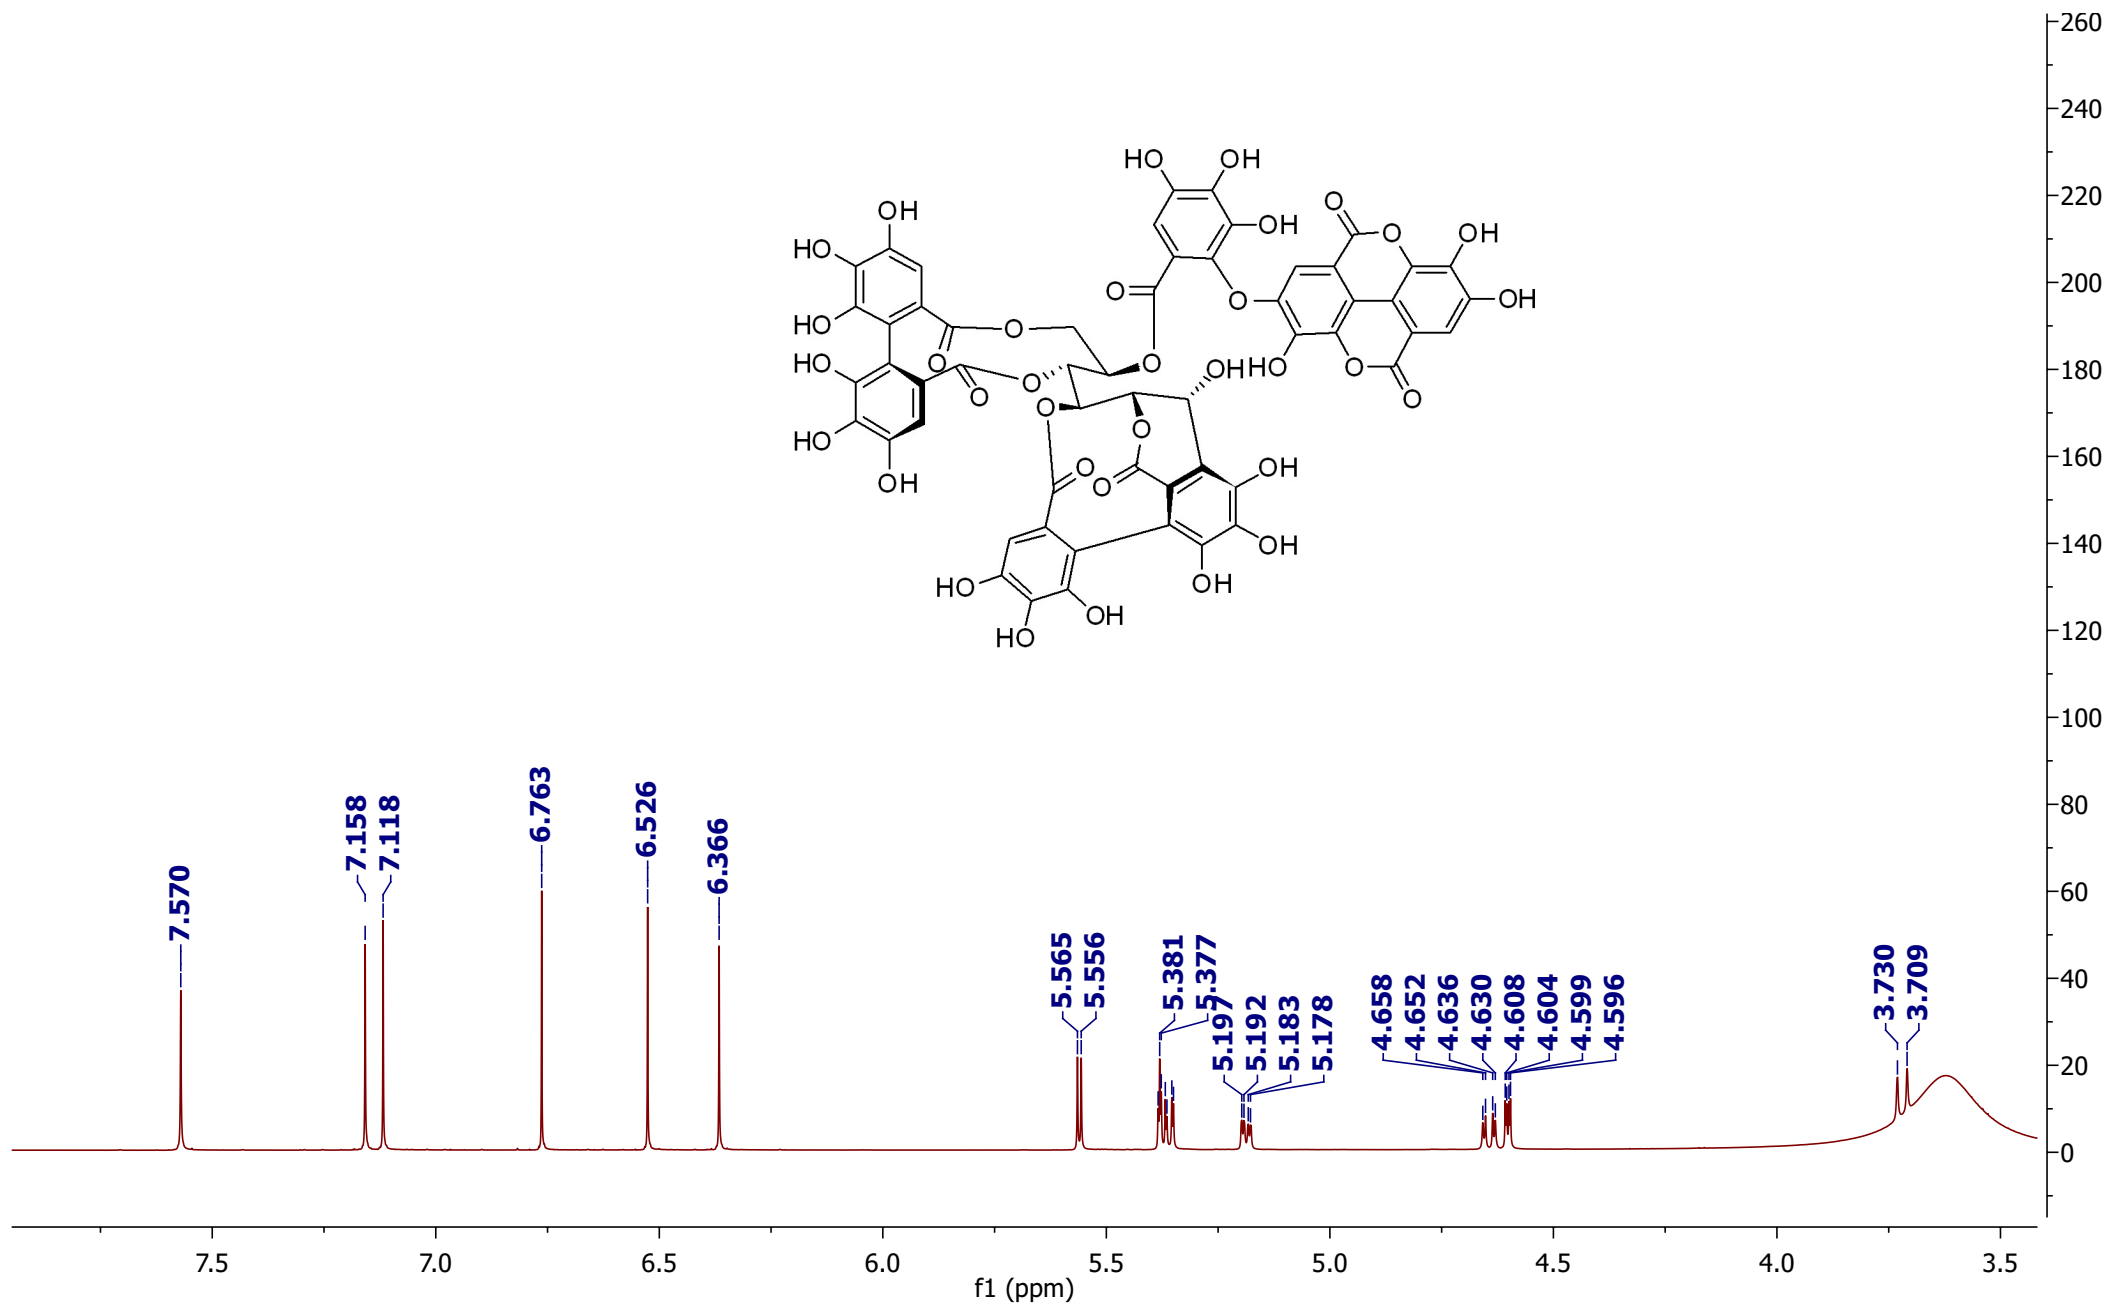

**Figure S39.** <sup>1</sup>H NMR spectrum of compound **10** [600 MHz, acetone-d<sub>6</sub> + D<sub>2</sub>O (9+1)]

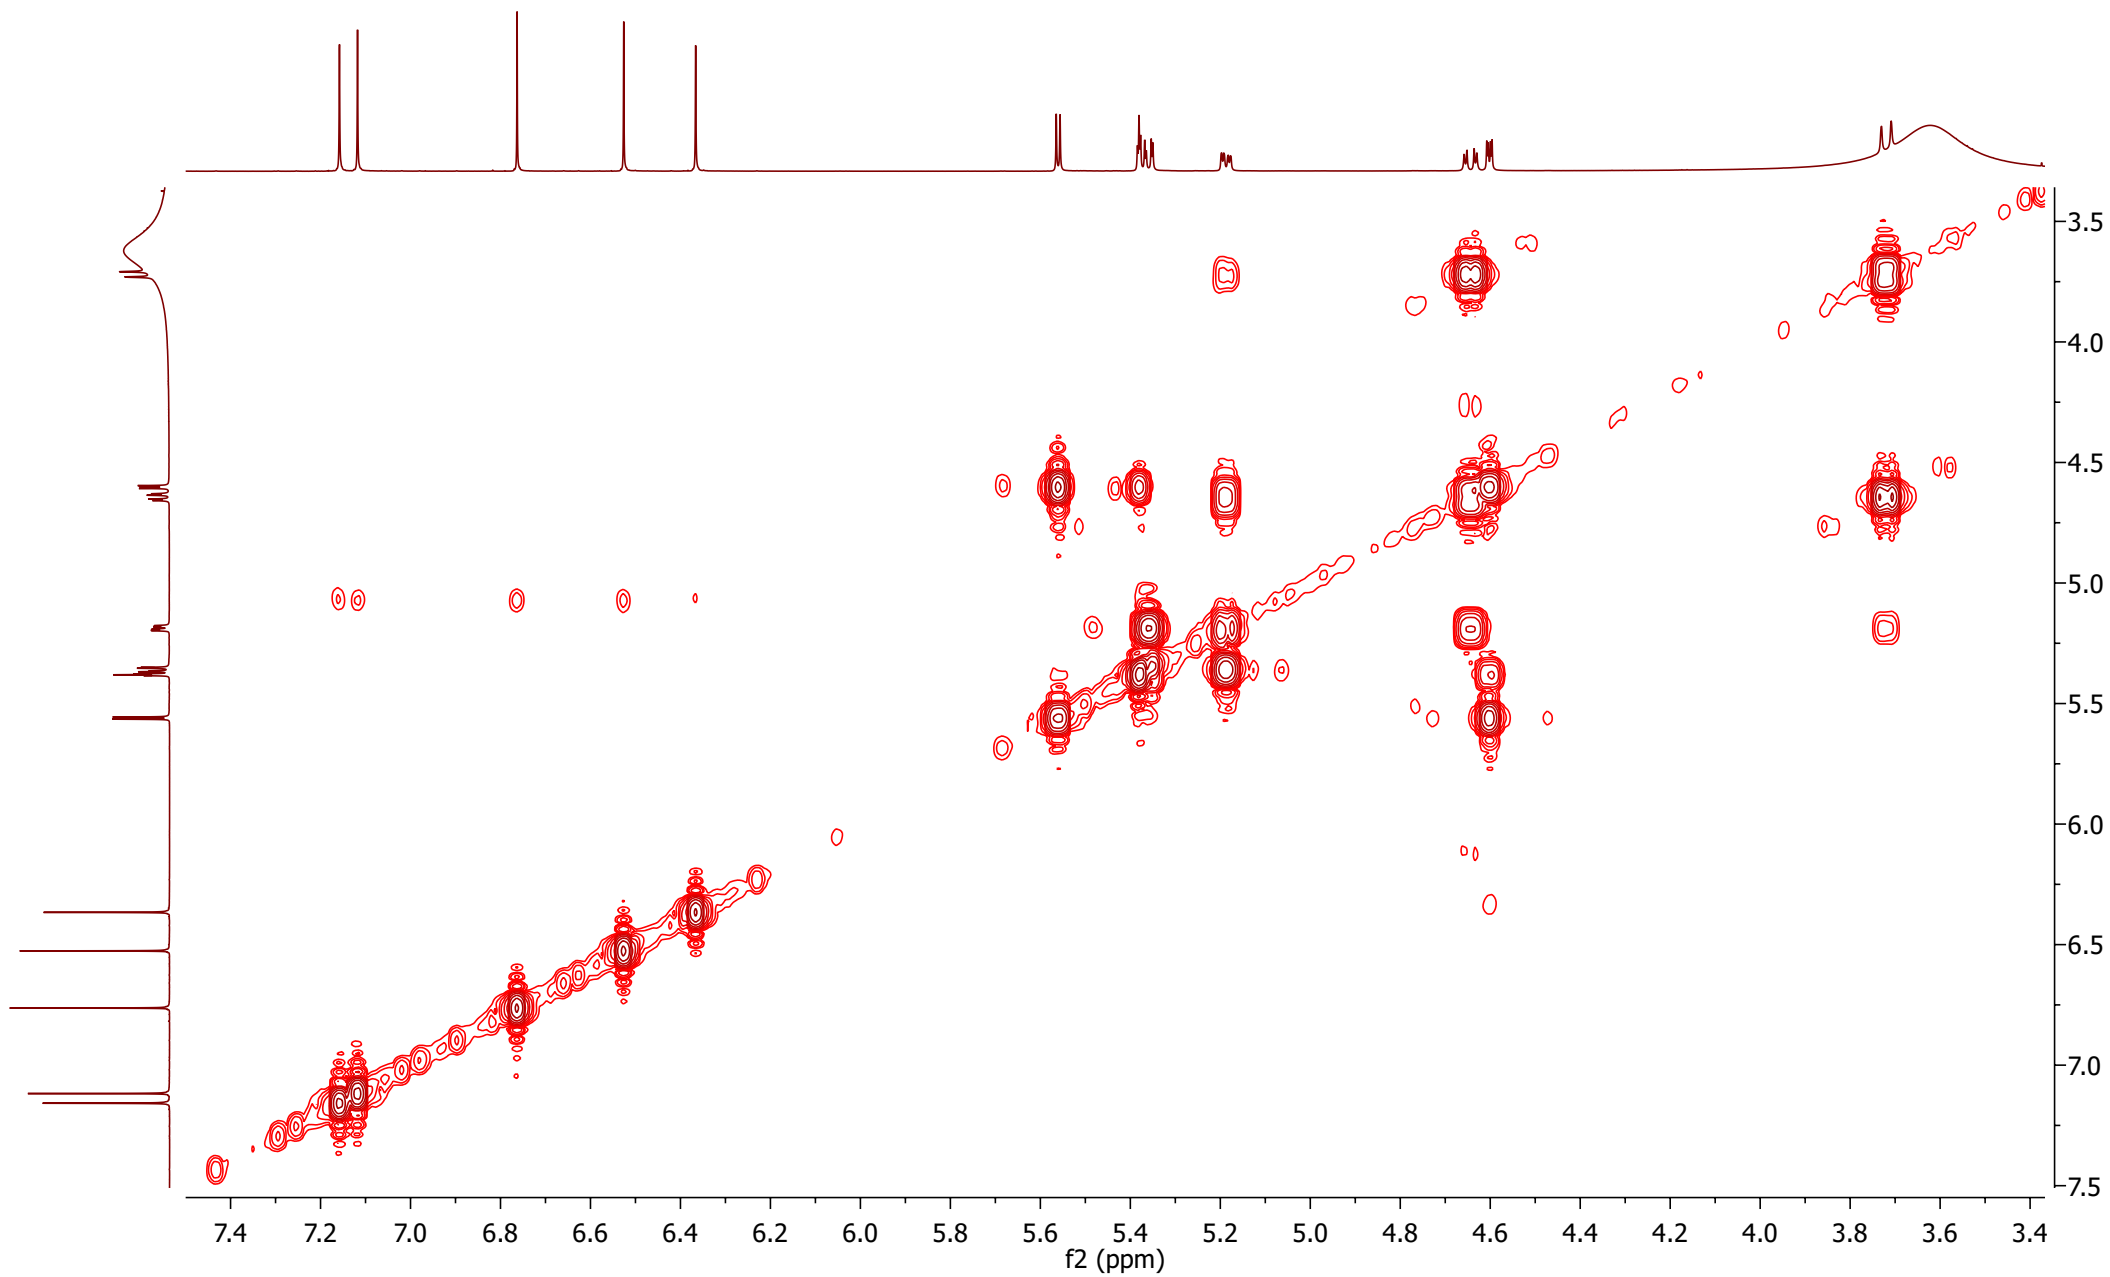

**Figure S40.**  $^1\text{H}$ - $^1\text{H}$  COSY spectrum of compound **10** [600 MHz, acetone- $d_6$  +  $\text{D}_2\text{O}$  (9+1)]

## Experimental procedures of TD-DFT calculation of the ECD spectrum of **1**

Quantum chemical calculations were performed with Gaussian16 [1]. The geometry of the various stereoisomers of compound **1** (1r3r, 1r3s, 1s3r, and 1s3s) were optimized in the gas phase with B3LYP/6-31+G and the resulting were confirmed to be stable structures (no imaginary frequencies). The resulting structures were then optimized with CAM-B3LYP/6-31G(d,p) in methanol using the polarizable continuum model (PCM) [2] and the optimized structures were used to calculate the ECD spectra with TD-DFT [3] at the same level. The CAM-B3LYP functional is chosen as it yields spectral properties in good agreement with experiment [4].

## References

- [1] Frisch, M. J.; Trucks, G. W.; Schlegel, H. B.; Scuseria, G. E.; Robb, M. A.; Cheeseman, J. R.; Scalmani, G.; Barone, V.; Petersson, G. A.; Nakatsuji, H.; Li, X.; Caricato, M.; Marenich, A. V.; Bloino, J.; Janesko, B. G.; Gomperts, R.; Mennucci, B.; Hratchian, H. P.; Ortiz, J. V.; Izmaylov, A. F.; Sonnenberg, J. L.; Williams-Young, D.; Ding, F.; Lipparini, F.; Egidi, F.; Goings, J.; Peng, B.; Petrone, A.; Henderson, T.; Ranasinghe, D.; Zakrzewski, V. G.; Gao, J.; Rega, N.; Zheng, G.; Liang, W.; Hada, M.; Ehara, M.; Toyota, K.; Fukuda, R.; Hasegawa, J.; Ishida, M.; Nakajima, T.; Honda, Y.; Kitao, O.; Nakai, H.; Vreven, T.; Throssell, K.; Montgomery, J. A., Jr.; Peralta, J. E.; Ogliaro, F.; Bearpark, M. J.; Heyd, J. J.; Brothers, E. N.; Kudin, K. N.; Staroverov, V. N.; Keith, T. A.; Kobayashi, R.; Normand, J.; Raghavachari, K.; Rendell, A. P.; Burant, J. C.; Iyengar, S. S.; Tomasi, J.; Cossi, M.; Millam, J. M.; Klene, M.; Adamo, C.; Cammi, R.; Ochterski, J. W.; Martin, R. L.; Morokuma, K.; Farkas, O.; Foresman, J. B.; Fox, D. J. Gaussian 16, revision A.03; Gaussian Inc.: Wallingford, CT, 2016.
- [2] Tomasi, J., Mennucci, B. and Cammi, R., 2005. Quantum mechanical continuum solvation models. *Chemical reviews*, 105(8), pp.2999-3094.
- [3] Runge, E. and Gross, E.K., 1984. Density-functional theory for time-dependent systems. *Physical Review Letters*, 52(12), p.997.
- [4] El-Zohry, A.M., Orabi, E.A., Karlsson, M. and Zietz, B., 2021. Twisted Intramolecular Charge Transfer (TICT) Controlled by Dimerization: An Overlooked Piece of the TICT Puzzle. *The Journal of Physical Chemistry A*, 125(14), pp.2885-2894.



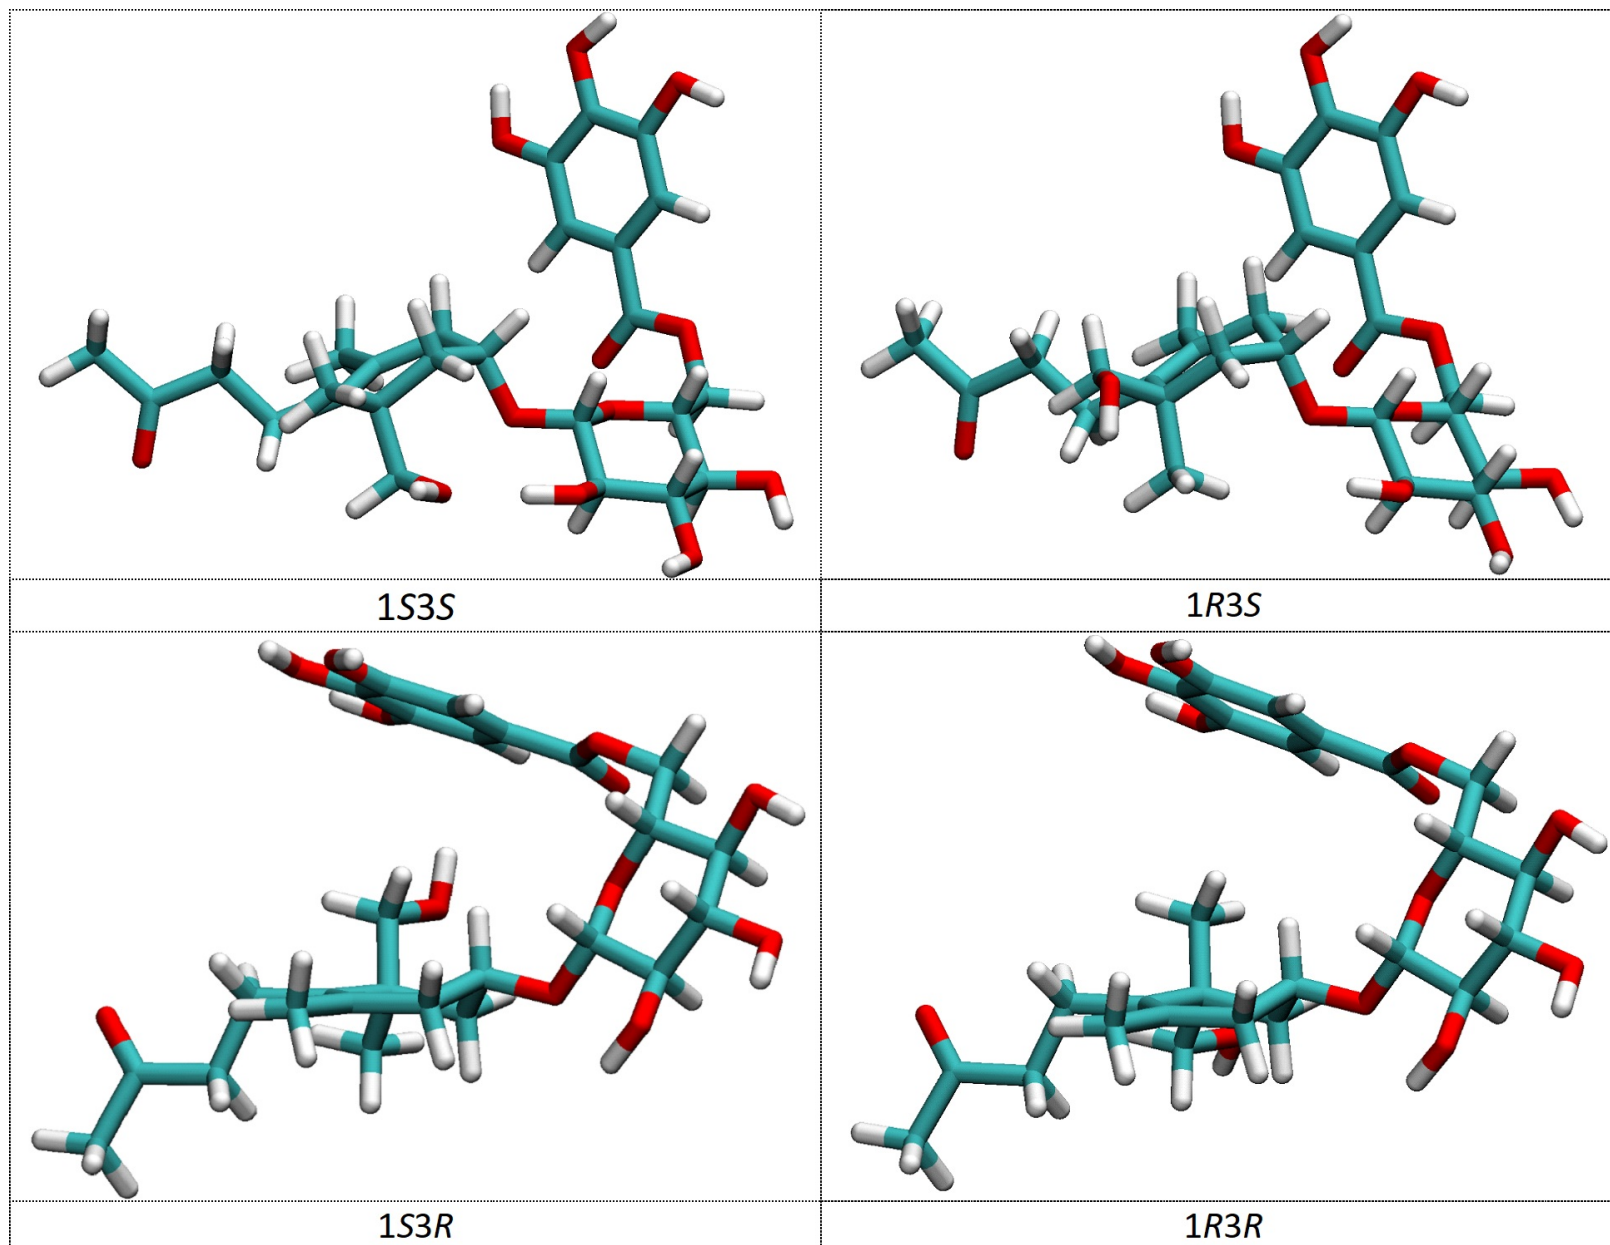

**Figure S41.** 3D structures of possible stereoisomers of compound **1**

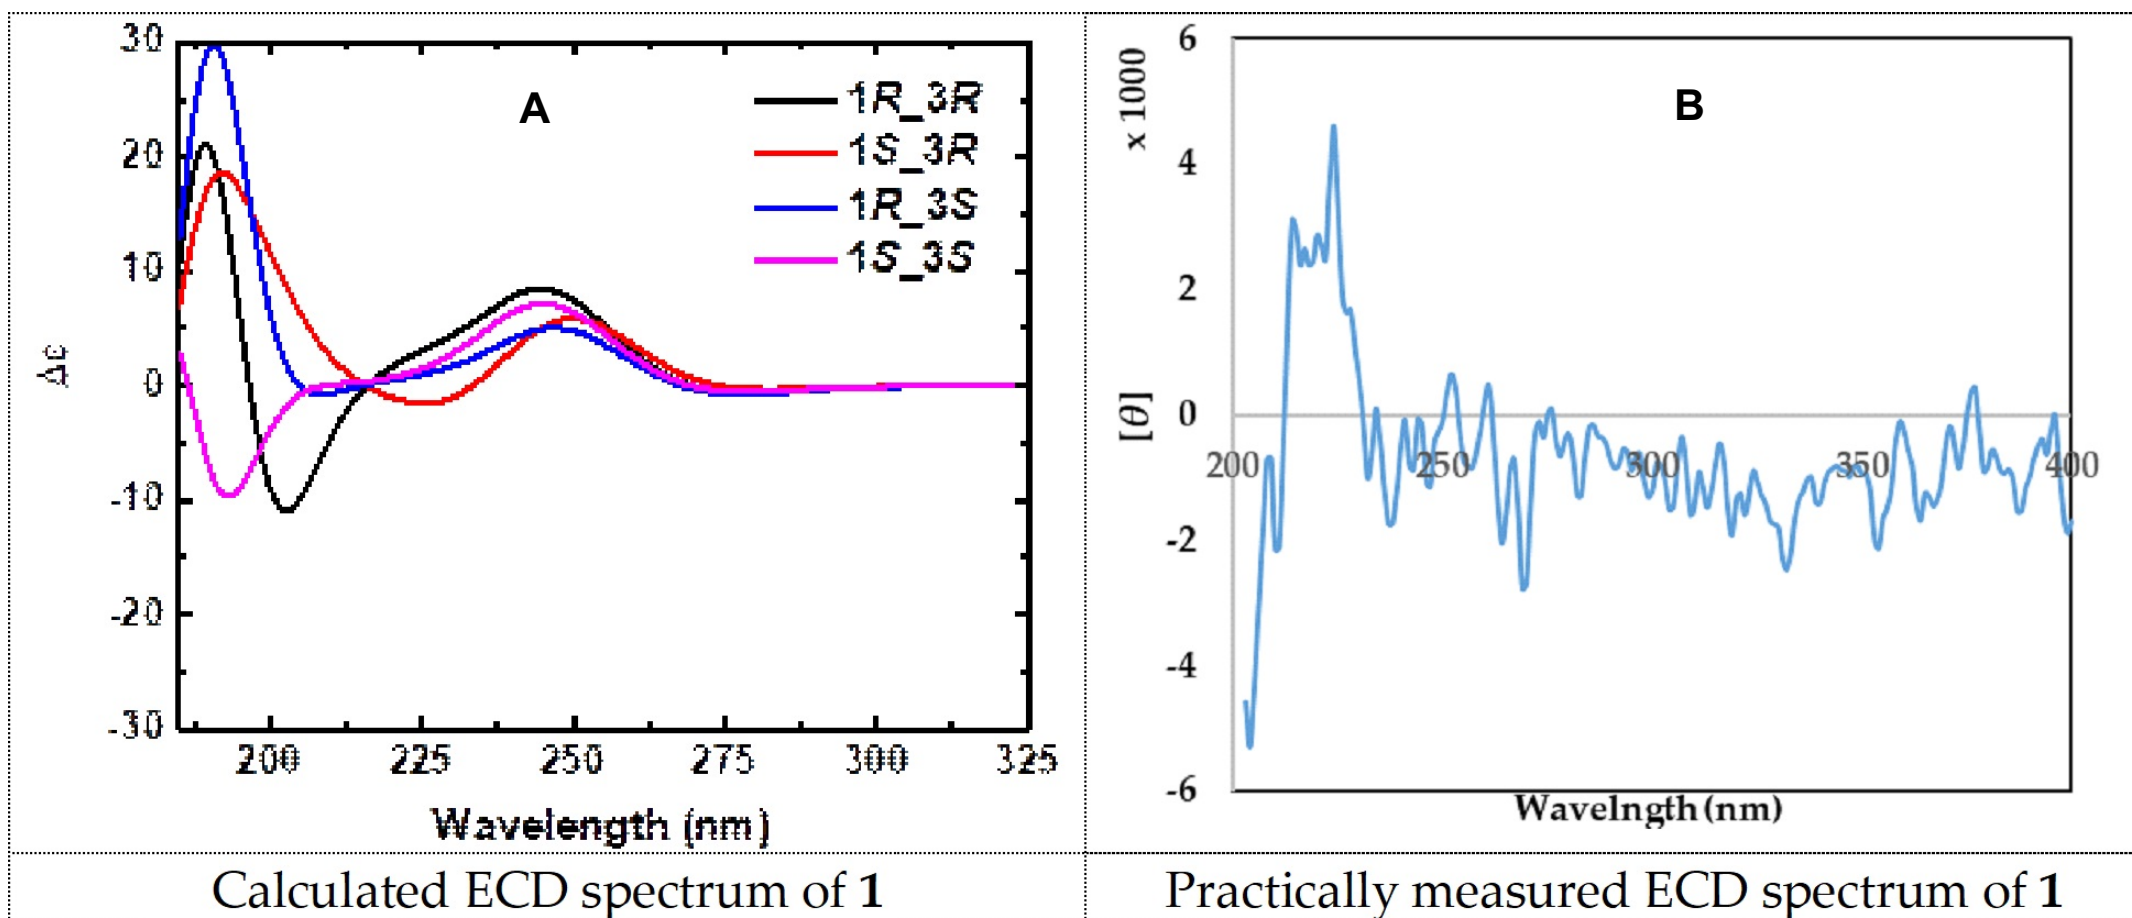

**Figure S42.** Calculated (**A**) and practically measured (**B**) ECD spectra of compound **1**
